# Supplementary material for: Efficient Synthesis of 4,8-Dibromo Derivative of Strong Electron-Deficient Benzo[1,2-d:4,5-d’]bis([1,2,3]thiadiazole) and Its SNAr and Cross-Coupling Reactions
Source: MDPI journal article supplement (doi:10.3390/molecules27217372), 2022-10-30

## Supplementary Materials

### Efficient synthesis of 4,8-dibromo derivative of strong electron-deficient benzo[1,2-d:4,5-d']bis([1,2,3]thiadiazole) and its S<sub>N</sub>Ar and cross-coupling reactions

Timofey N. Chmovzh <sup>1,2</sup>, Daria A. Alekhina<sup>1</sup>, Timofey A. Kudryashev <sup>1,3</sup>, and Oleg A. Rakitin <sup>1,\*</sup>

<sup>1</sup> N. D. Zelinsky Institute of Organic Chemistry, Russian Academy of Sciences, 119991 Moscow, Russian Federation

<sup>2</sup> Nanotechnology Education and Research Center, South Ural State University, 454080 Chelyabinsk, Russia

<sup>3</sup> Department of Chemistry, Moscow State University, 119899 Moscow, Russia

\* Correspondence: orakitin@ioc.ac.ru; Tel.: +7 499 135 5327

#### Table of contents:

|                                                           |     |
|-----------------------------------------------------------|-----|
| <sup>1</sup> H, <sup>13</sup> C NMR and HRMS spectra..... | S2  |
| Quantum-chemical calculations.....                        | S56 |

# $^1\text{H}$ , $^{13}\text{C}$ NMR and HRMS spectra

## 4,8-Dibromobenzo[1,2-d:4,5-d']bis([1,2,3]thiadiazole) (1)

### $^{13}\text{C}$ NMR(75 MHz)

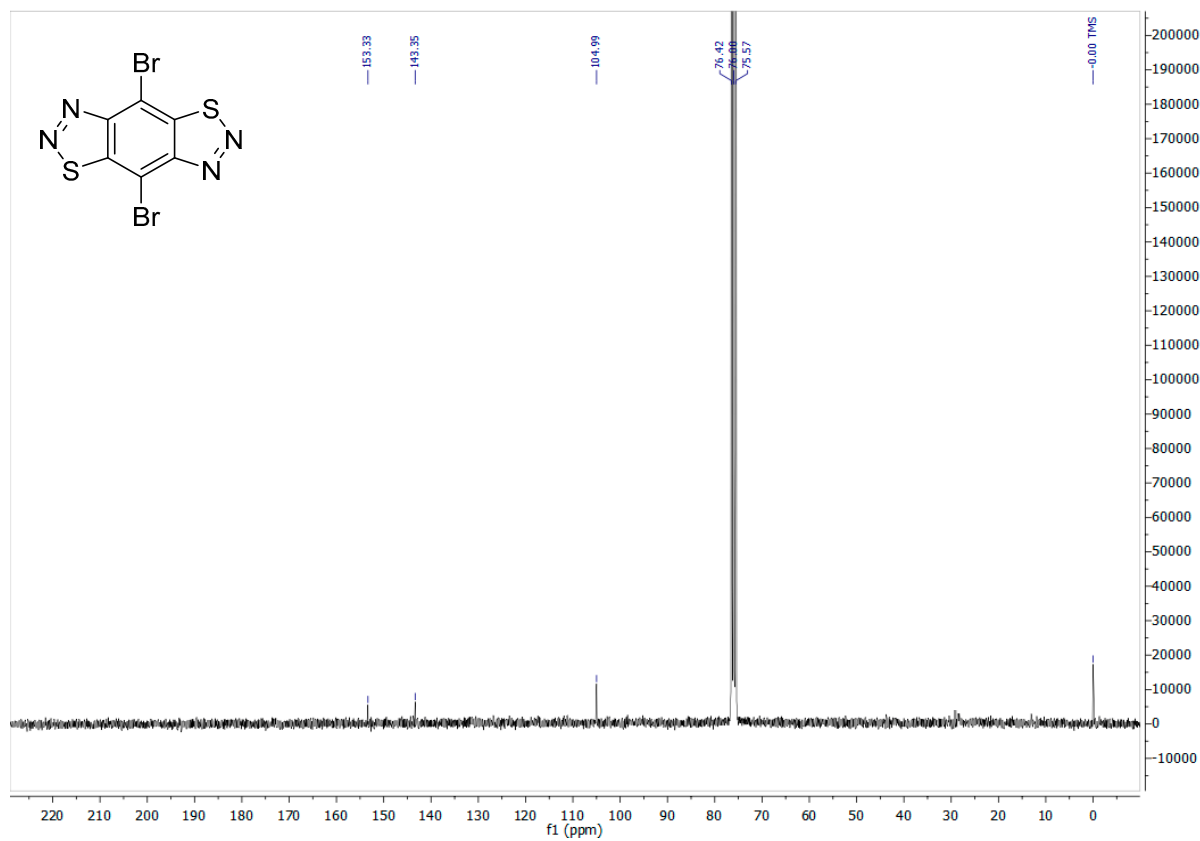

## Display Report

### Analysis Info

Analysis Name D:\Data\Kolotyrkina\2021\Chmovsh\0831016.d  
Method tune\_50-1600.m  
Sample Name /SUSU Tim-491  
Comment C6Br2N4S2 mH 350.800 clb added, CH3OH

Acquisition Date 31.08.2021 12:58:20

Operator BDAL@DE  
Instrument / Ser# micrOTOF 10248

### Acquisition Parameter

|             |            |                      |          |                  |           |
|-------------|------------|----------------------|----------|------------------|-----------|
| Source Type | ESI        | Ion Polarity         | Positive | Set Nebulizer    | 1.0 Bar   |
| Focus       | Not active |                      |          | Set Dry Heater   | 200 °C    |
| Scan Begin  | 50 m/z     | Set Capillary        | 4500 V   | Set Dry Gas      | 4.0 l/min |
| Scan End    | 1600 m/z   | Set End Plate Offset | -500 V   | Set Divert Valve | Waste     |

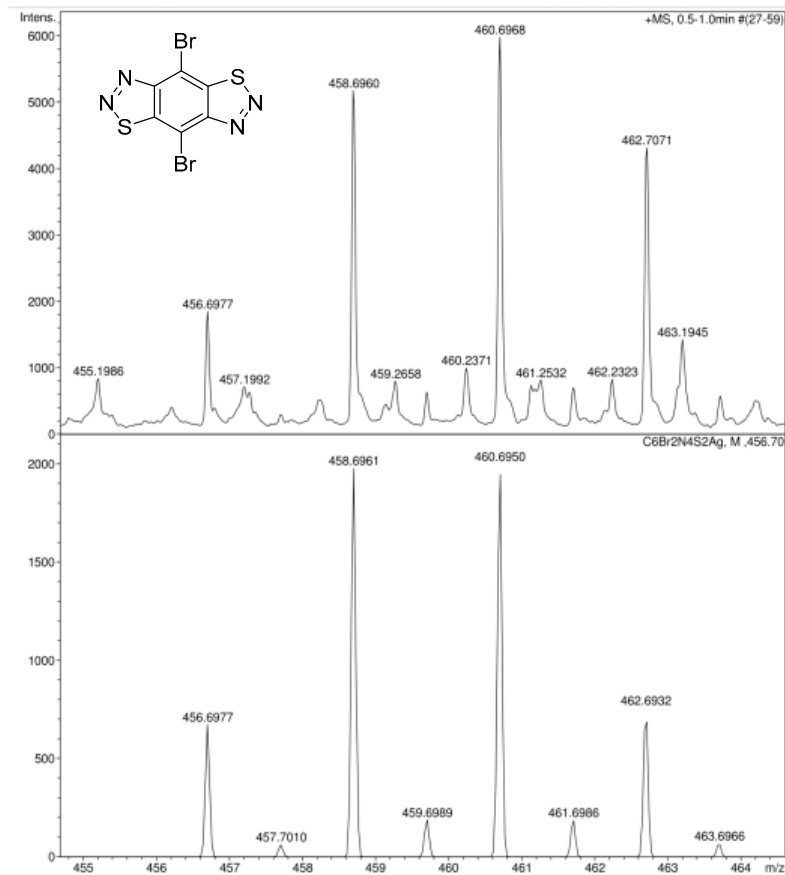

**4-(8-Bromobenzo[1,2-d:4,5-d']bis([1,2,3]thiadiazole)-4-yl)morpholine (12a)**

**<sup>1</sup>H NMR (300 MHz)**

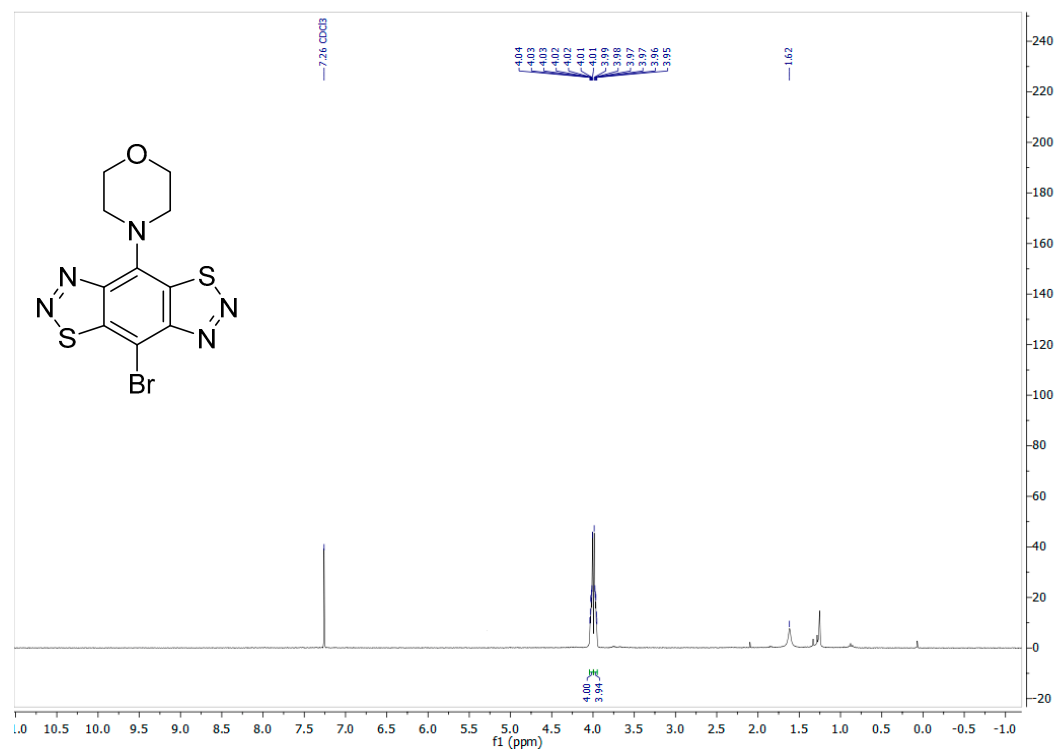

**<sup>13</sup>C NMR (75 MHz)**

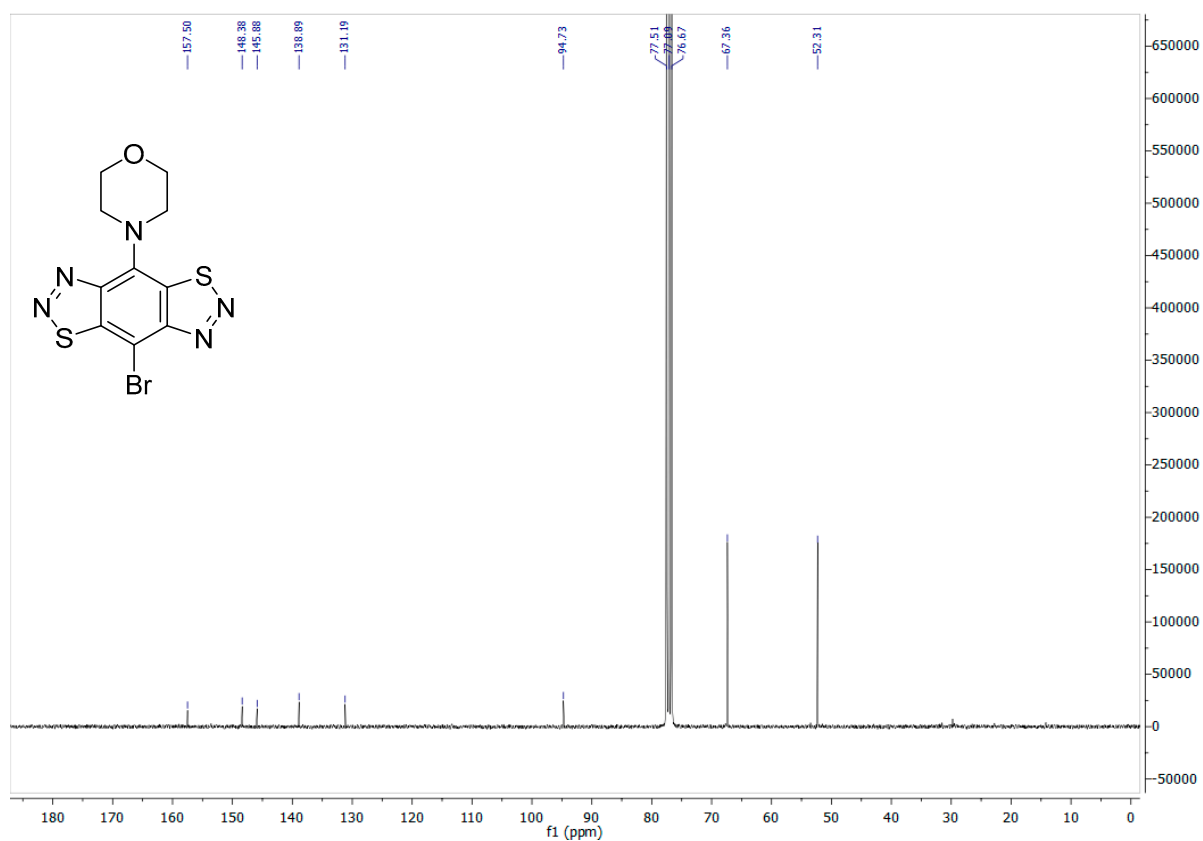

## Display Report

### Analysis Info

Analysis Name D:\Data\Kolotyrykina\2021\Chmovsh\0928014.d  
 Method tune\_50-1600.m  
 Sample Name /SUSU Tim-493  
 Comment C10H8BrN5OS2 mH 357.9426 calibrant added CH3CN

Acquisition Date 28.09.2021 11:53:23

Operator BDAL@DE  
 Instrument / Ser# microTOF 10248

### Acquisition Parameter

|             |            |                      |          |                  |           |
|-------------|------------|----------------------|----------|------------------|-----------|
| Source Type | ESI        | Ion Polarity         | Positive | Set Nebulizer    | 1.0 Bar   |
| Focus       | Not active |                      |          | Set Dry Heater   | 200 °C    |
| Scan Begin  | 50 m/z     | Set Capillary        | 4500 V   | Set Dry Gas      | 4.0 l/min |
| Scan End    | 1600 m/z   | Set End Plate Offset | -500 V   | Set Divert Valve | Waste     |

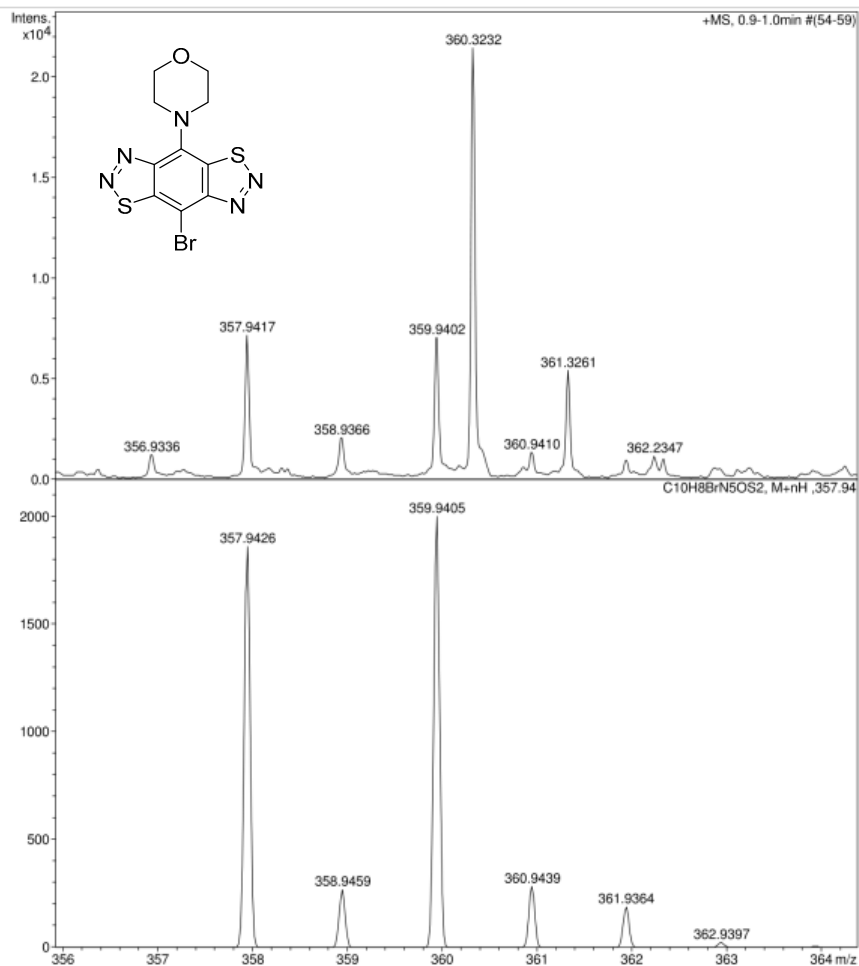

# 4-Bromo-8-(piperidin-1-yl)benzo[1,2-d:4,5-d']bis([1,2,3]thiadiazole) (12b)

$^1\text{H}$  NMR (300 MHz)

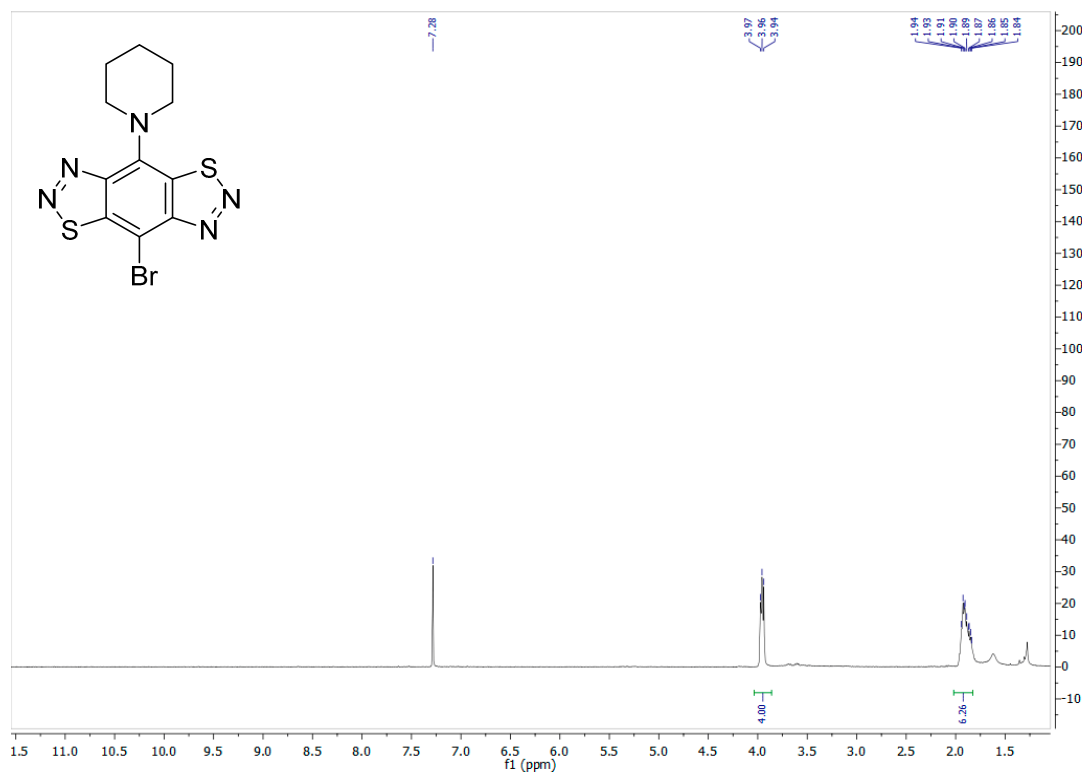

$^{13}\text{C}$  NMR (75 MHz)

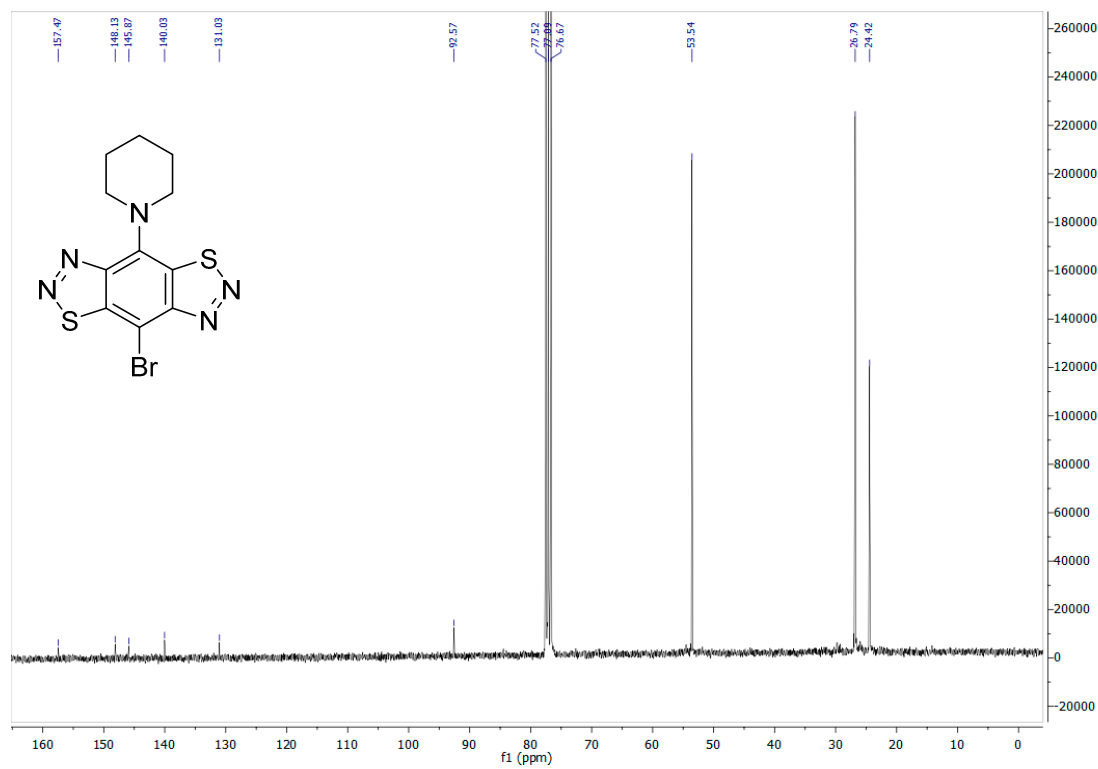

# Display Report

## Analysis Info

Analysis Name D:\Data\Kolotyrkina\2022\Chmovsh\0601011.d  
 Method tune\_50-1600\_pos\_15\_12.m  
 Sample Name /SUSU Tim-531  
 Comment C11H10BrN5S2 mH 355.9644 calibrant added CH3CN

Acquisition Date 01.06.2022 12:44:42

Operator BDAL@DE  
 Instrument / Ser# micrOTOF 10248

## Acquisition Parameter

|             |            |                      |          |                  |           |
|-------------|------------|----------------------|----------|------------------|-----------|
| Source Type | ESI        | Ion Polarity         | Positive | Set Nebulizer    | 0.4 Bar   |
| Focus       | Not active |                      |          | Set Dry Heater   | 180 °C    |
| Scan Begin  | 50 m/z     | Set Capillary        | 4500 V   | Set Dry Gas      | 4.0 l/min |
| Scan End    | 1600 m/z   | Set End Plate Offset | -500 V   | Set Divert Valve | Waste     |

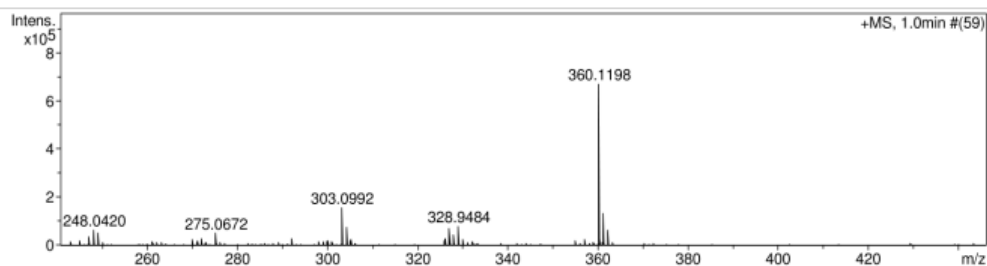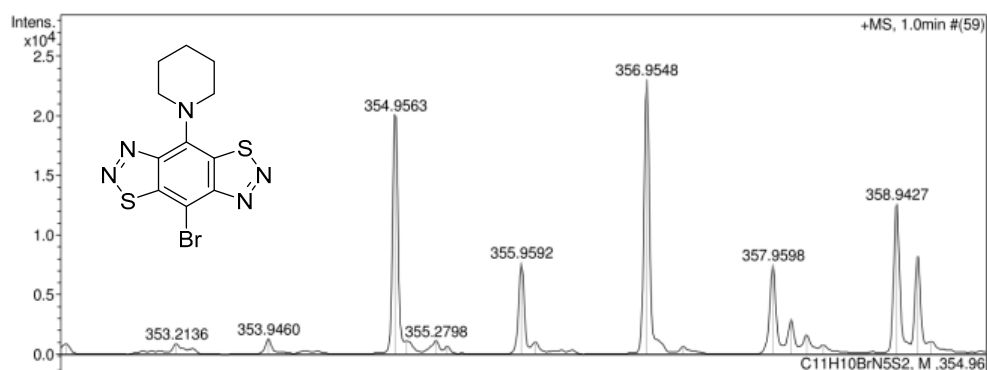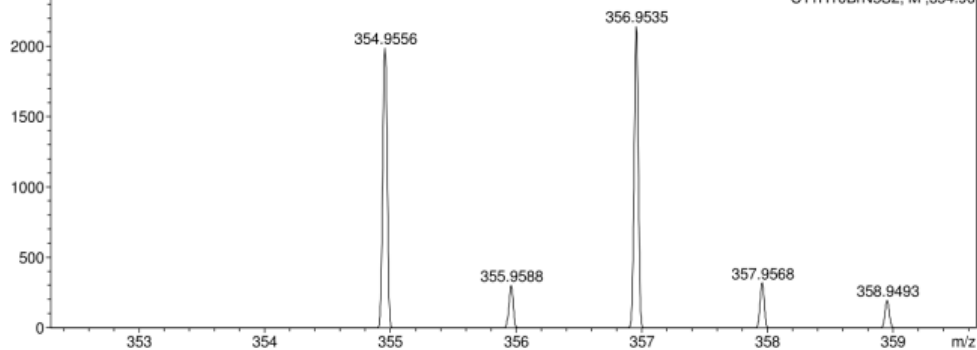



# 4-Bromo-8-(pyrrolidin-1-yl)benzo[1,2-d:4,5-d']bis([1,2,3]thiadiazole) (12c)

<sup>1</sup>H NMR (300 MHz)

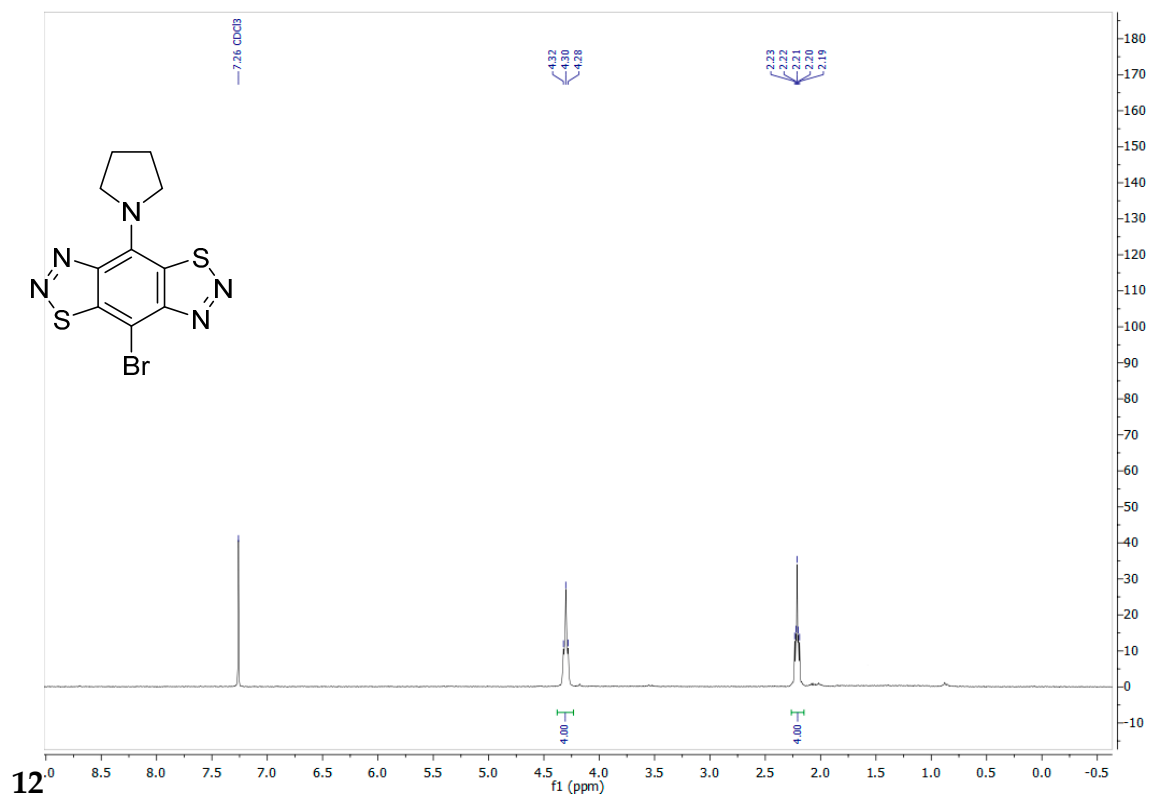

<sup>13</sup>C NMR (75 MHz)

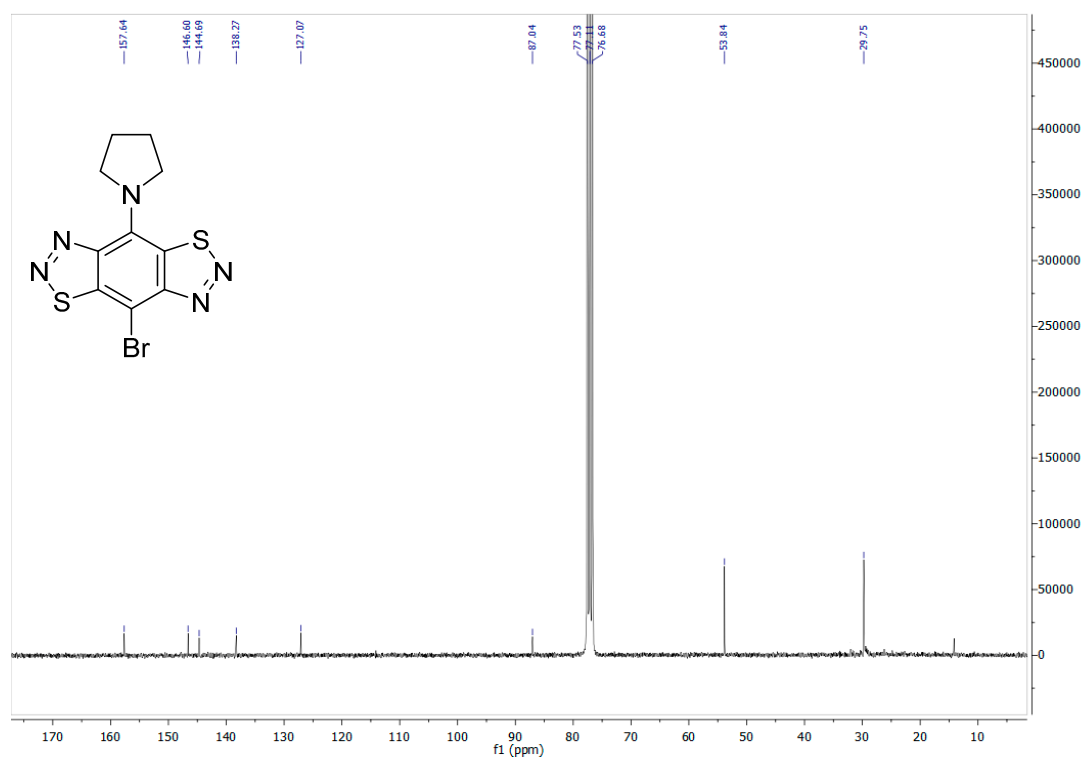

# Display Report

## Analysis Info

Analysis Name D:\Data\Kolotyrkina\2021\Chmovshi\0928045.d  
 Method tune\_50-1600.m  
 Sample Name /SUSU Tim-496  
 Comment C10H8BrN5S2 mH 341.9477 calibrant added CH3OH

Acquisition Date 28.09.2021 17:11:46  
 Operator BDAL@DE  
 Instrument / Ser# micrOTOF 10248

## Acquisition Parameter

|             |            |                      |          |                  |           |
|-------------|------------|----------------------|----------|------------------|-----------|
| Source Type | ESI        | Ion Polarity         | Positive | Set Nebulizer    | 1.0 Bar   |
| Focus       | Not active |                      |          | Set Dry Heater   | 200 °C    |
| Scan Begin  | 50 m/z     | Set Capillary        | 4500 V   | Set Dry Gas      | 4.0 l/min |
| Scan End    | 1600 m/z   | Set End Plate Offset | -500 V   | Set Divert Valve | Waste     |

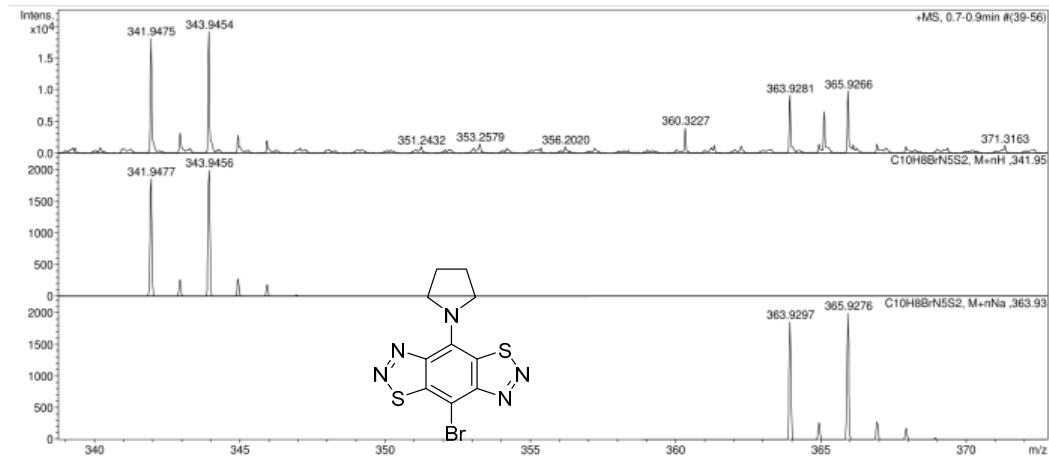

**4-Bromo-8-(2,3,3a,8b-tetrahydrocyclopenta[b]indol-4(1H)-yl)benzo[1,2-d:4,5-d']bis([1,2,3]thiadiazole) (12d)**

**$^1\text{H}$  NMR (300 MHz)**

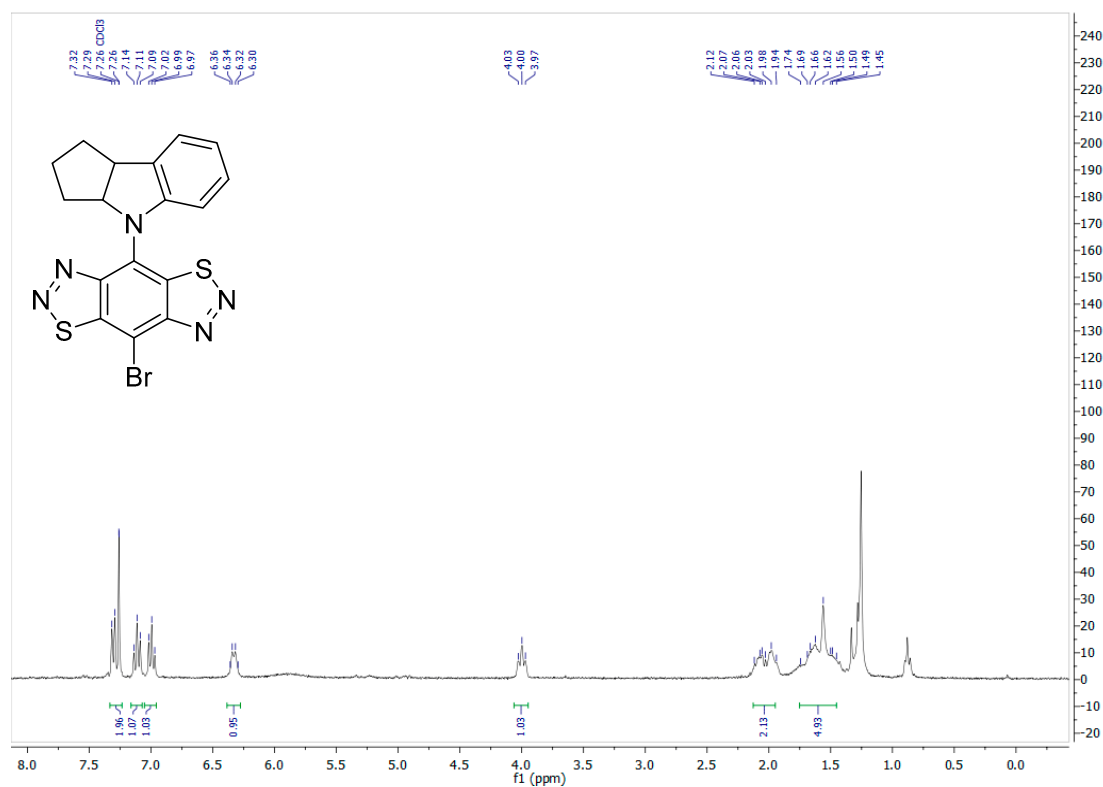

**$^{13}\text{C}$  NMR(75 MHz)**

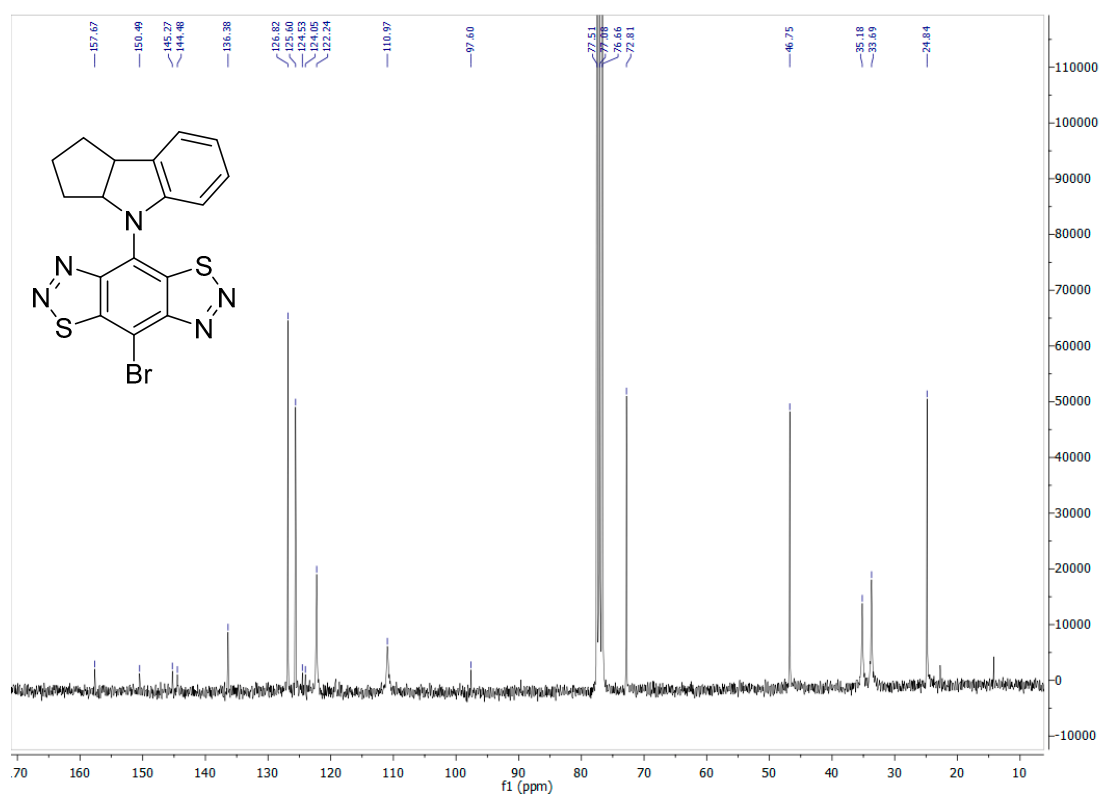

# Display Report

## Analysis Info

Analysis Name D:\Data\Chizhov\Rakitin\Chmovzh\tim-550\_&clblow.d  
 Method tune\_low.m  
 Sample Name /SUSU Tim-550  
 Comment CH3CN 100 %, dil. 200, calibrant added

Acquisition Date 02.09.2022 16:28:34

Operator BDAL@DE  
 Instrument / Ser# micrOTOF 10248

## Acquisition Parameter

|             |            |                      |          |                  |           |
|-------------|------------|----------------------|----------|------------------|-----------|
| Source Type | ESI        | Ion Polarity         | Positive | Set Nebulizer    | 0.4 Bar   |
| Focus       | Not active |                      |          | Set Dry Heater   | 180 °C    |
| Scan Begin  | 50 m/z     | Set Capillary        | 4500 V   | Set Dry Gas      | 4.0 l/min |
| Scan End    | 3000 m/z   | Set End Plate Offset | -500 V   | Set Divert Valve | Waste     |

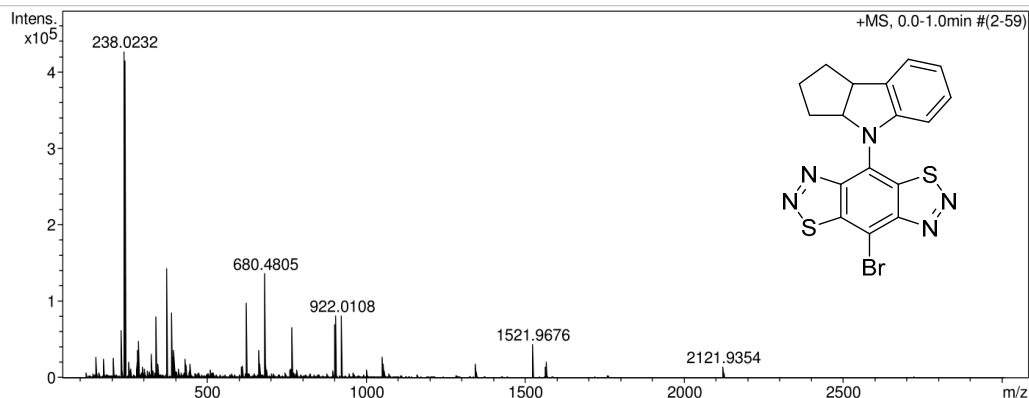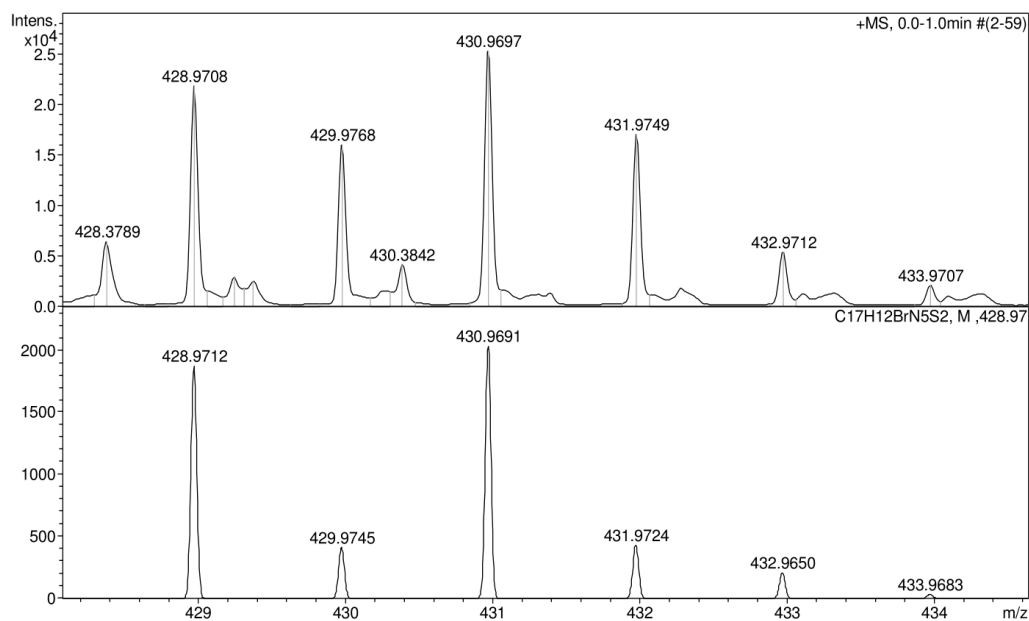

**8-Bromo-N-phenylbenzo[1,2-d:4,5-d']bis([1,2,3]thiadiazole)-4-amine (12e)**

**<sup>1</sup>H NMR (300 MHz)**

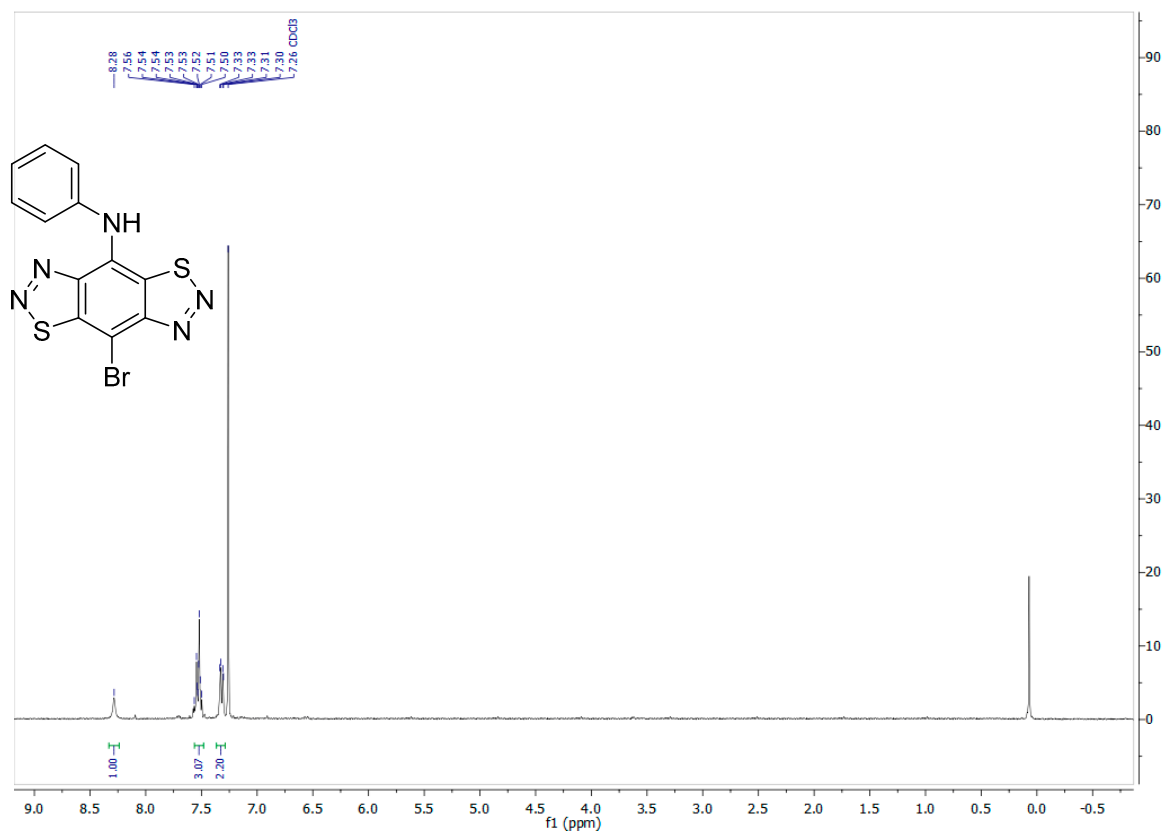

**<sup>13</sup>C NMR (75 MHz)**

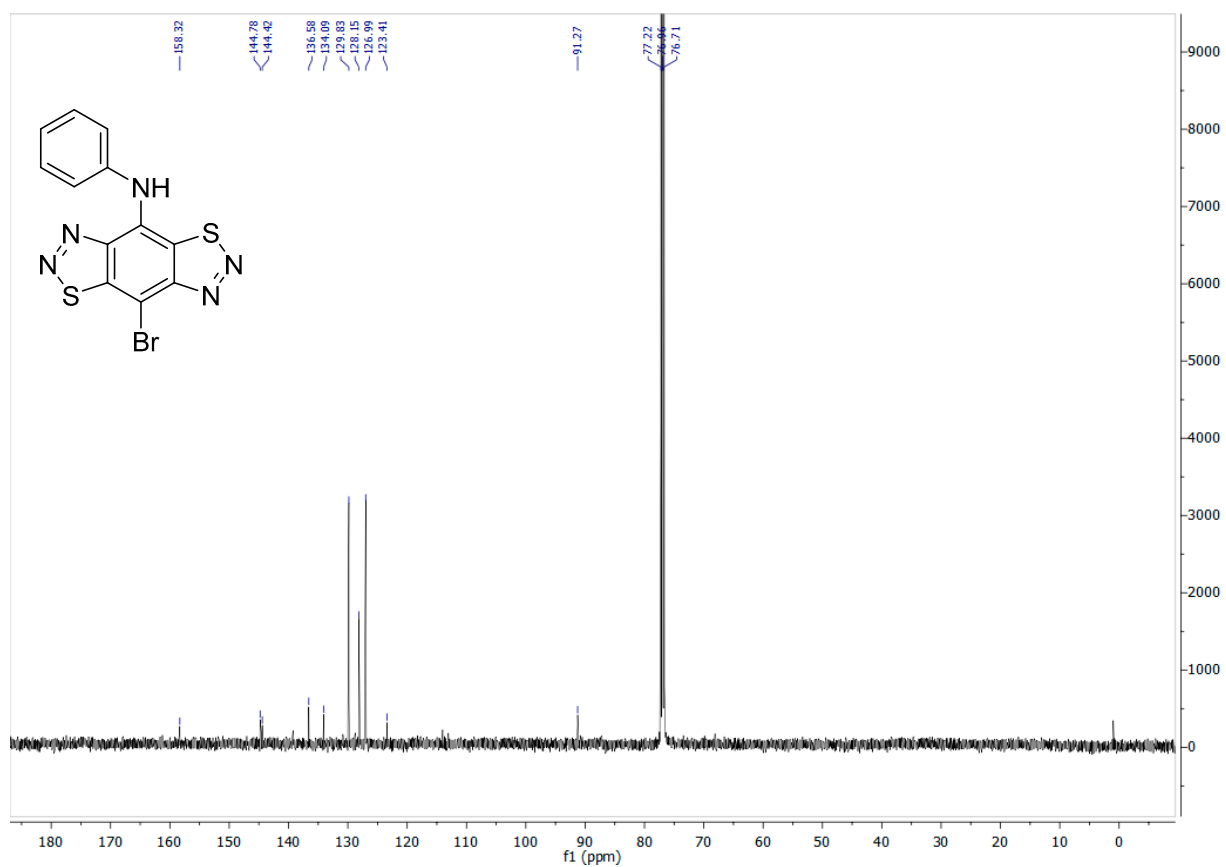

## Display Report

### Analysis Info

Analysis Name D:\Data\Kolotyrkina\2022\Chmovsh\0608027.d  
Method tune\_50-1600\_pos\_15\_12.m  
Sample Name /SUSU Tim-532  
Comment C12H6BrN5S2 mH 363.9320 clb added CH3CN

Acquisition Date 08.06.2022 16:38:37  
Operator BDAL@DE  
Instrument / Ser# micrOTOF 10248

### Acquisition Parameter

|             |            |                      |          |                  |           |
|-------------|------------|----------------------|----------|------------------|-----------|
| Source Type | ESI        | Ion Polarity         | Positive | Set Nebulizer    | 0.4 Bar   |
| Focus       | Not active |                      |          | Set Dry Heater   | 180 °C    |
| Scan Begin  | 50 m/z     | Set Capillary        | 4500 V   | Set Dry Gas      | 4.0 l/min |
| Scan End    | 1600 m/z   | Set End Plate Offset | -500 V   | Set Divert Valve | Waste     |

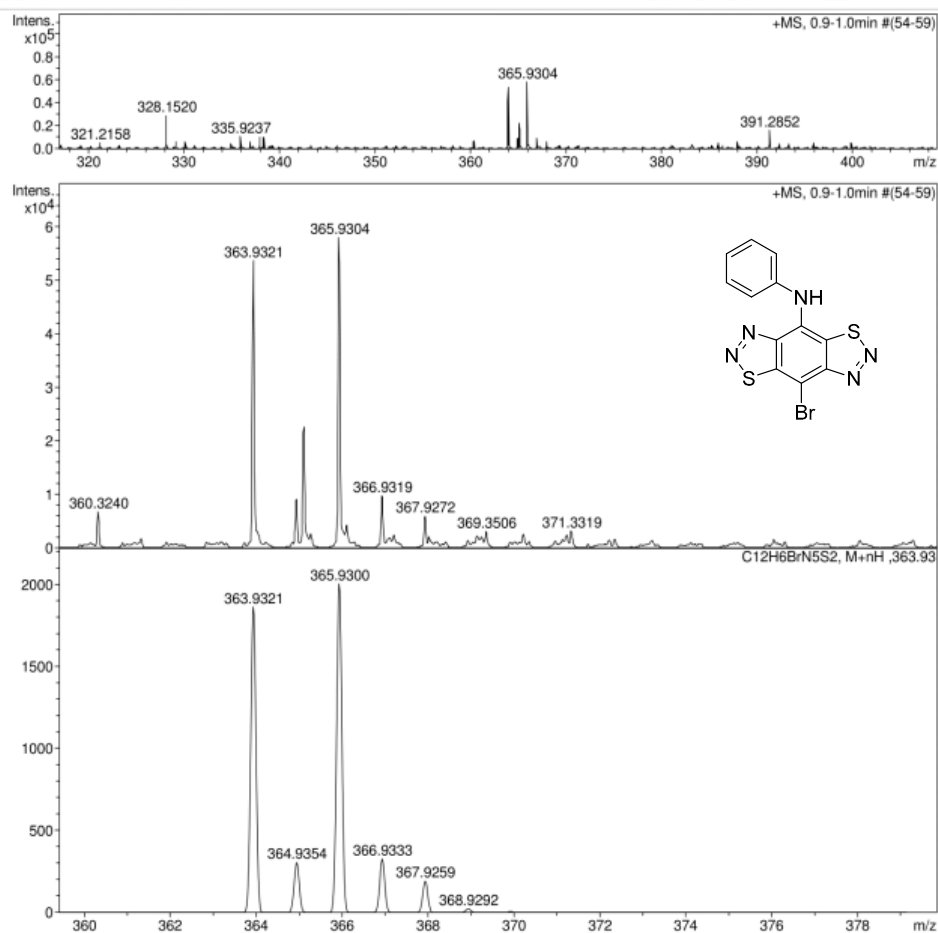



# 4,8-Dimorpholinobenzo[1,2-d:4,5-d']bis([1,2,3]thiadiazole) (13a)

$^1\text{H}$  NMR (300 MHz)

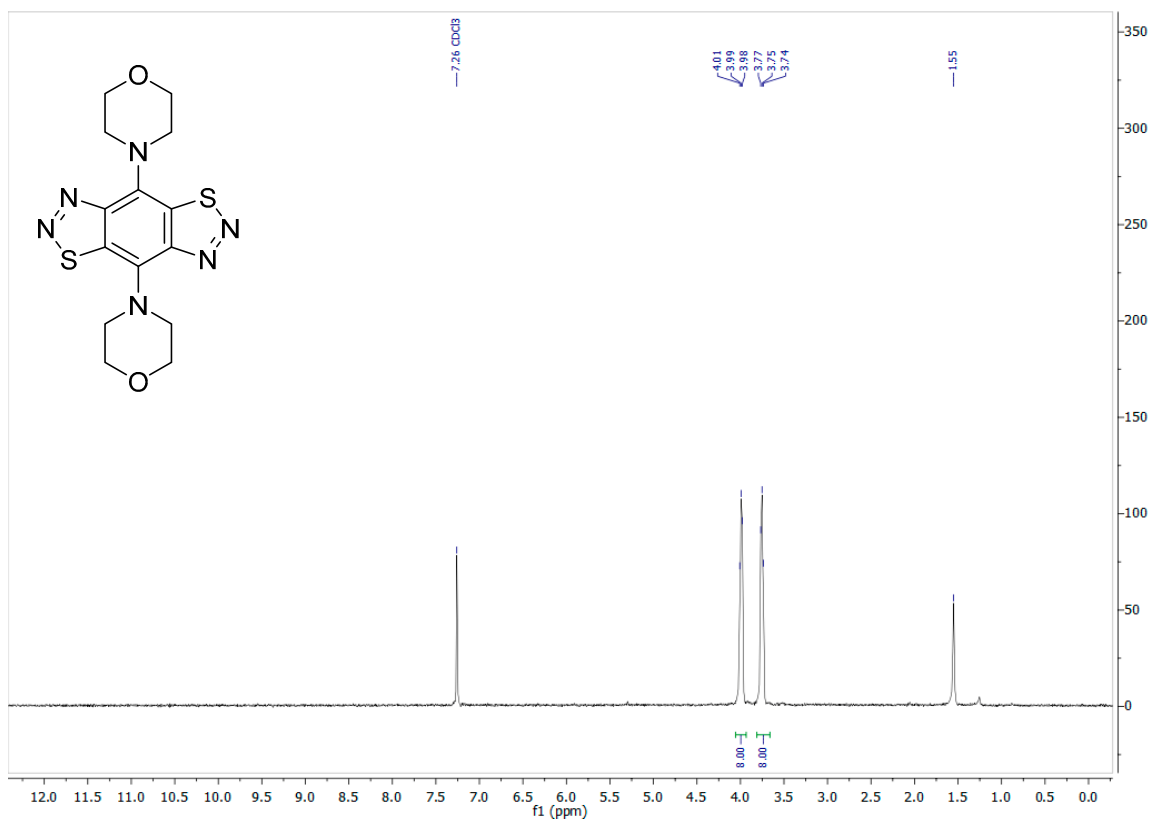

$^{13}\text{C}$  NMR (75 MHz)

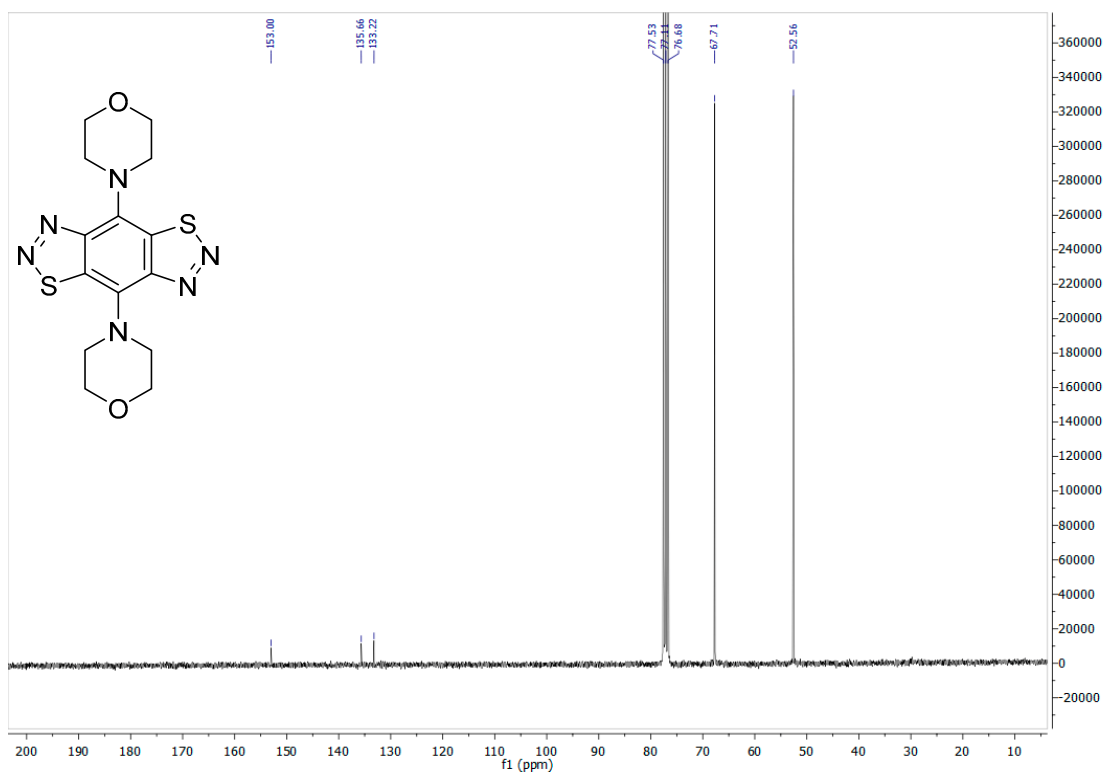

# Display Report

## Analysis Info

Analysis Name D:\Data\Kolotyrykina\2022\Chmovsh\0727007.d  
 Method tune\_100-1200.m  
 Sample Name /SUSU Tim-543  
 Comment C14H16N6O2S2 mH 365.0848 clb added CH3CN

Acquisition Date 27.07.2022 16:08:20

Operator BDAL@DE  
 Instrument / Ser# maXis 43

## Acquisition Parameter

|             |          |                      |          |                  |           |
|-------------|----------|----------------------|----------|------------------|-----------|
| Source Type | ESI      | Ion Polarity         | Positive | Set Nebulizer    | 1.0 Bar   |
| Focus       | Active   |                      |          | Set Dry Heater   | 200 °C    |
| Scan Begin  | 50 m/z   | Set Capillary        | 4500 V   | Set Dry Gas      | 4.0 l/min |
| Scan End    | 1800 m/z | Set End Plate Offset | -500 V   | Set Divert Valve | Waste     |

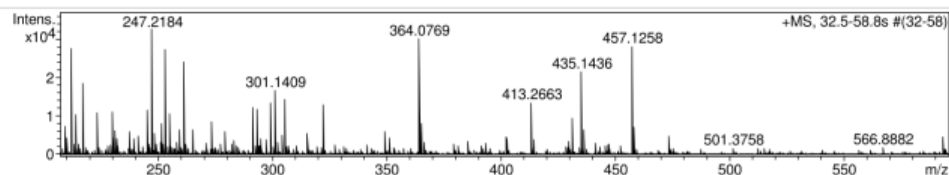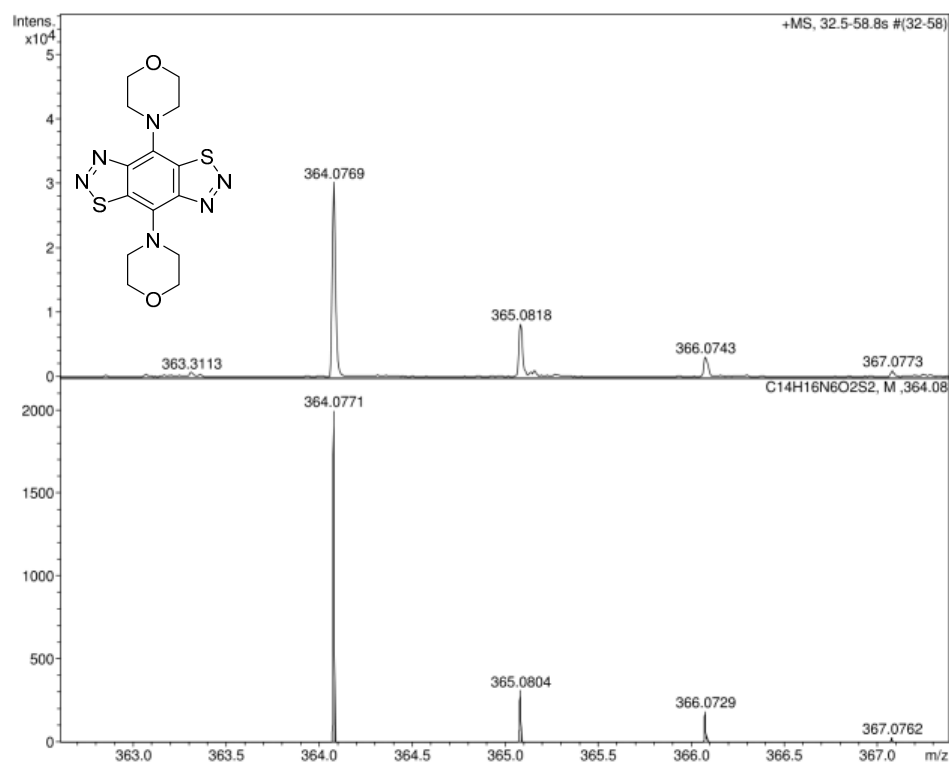

# 4,8-Di(piperidin-1-yl)benzo[1,2-d:4,5-d']bis([1,2,3]thiadiazole) (13b)

$^1\text{H}$  NMR (300 MHz)

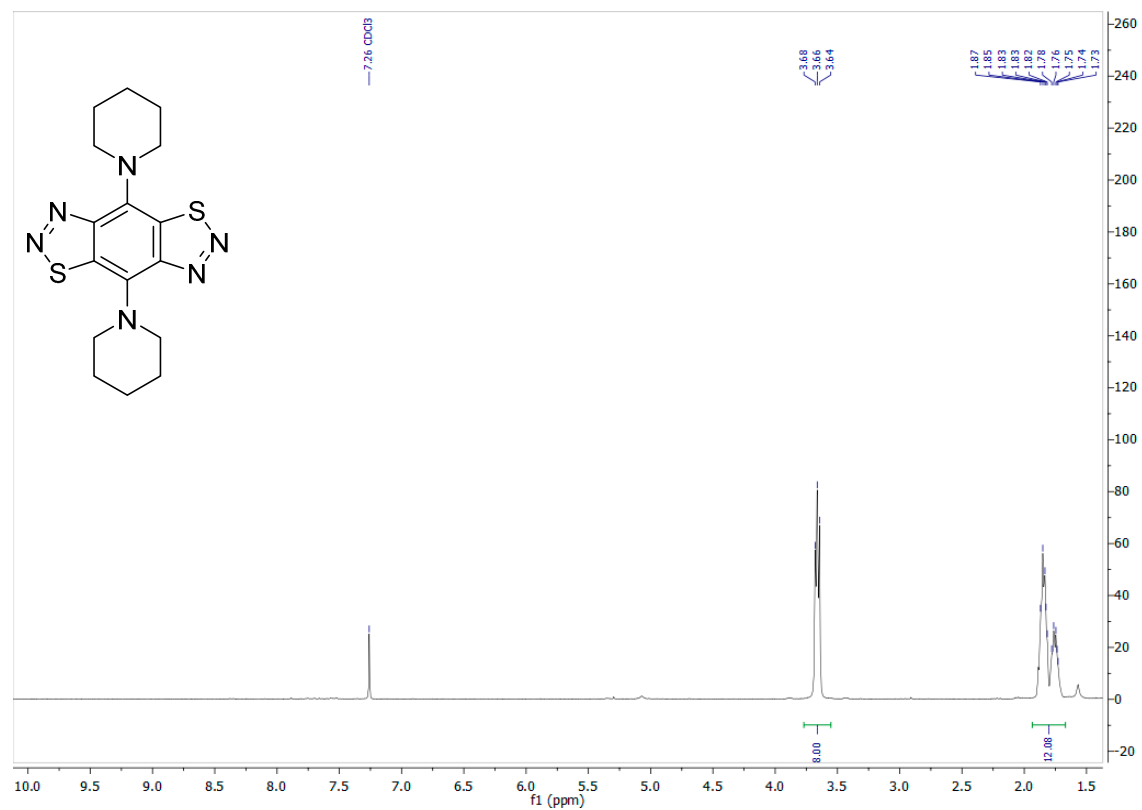

$^{13}\text{C}$  NMR (75 MHz)

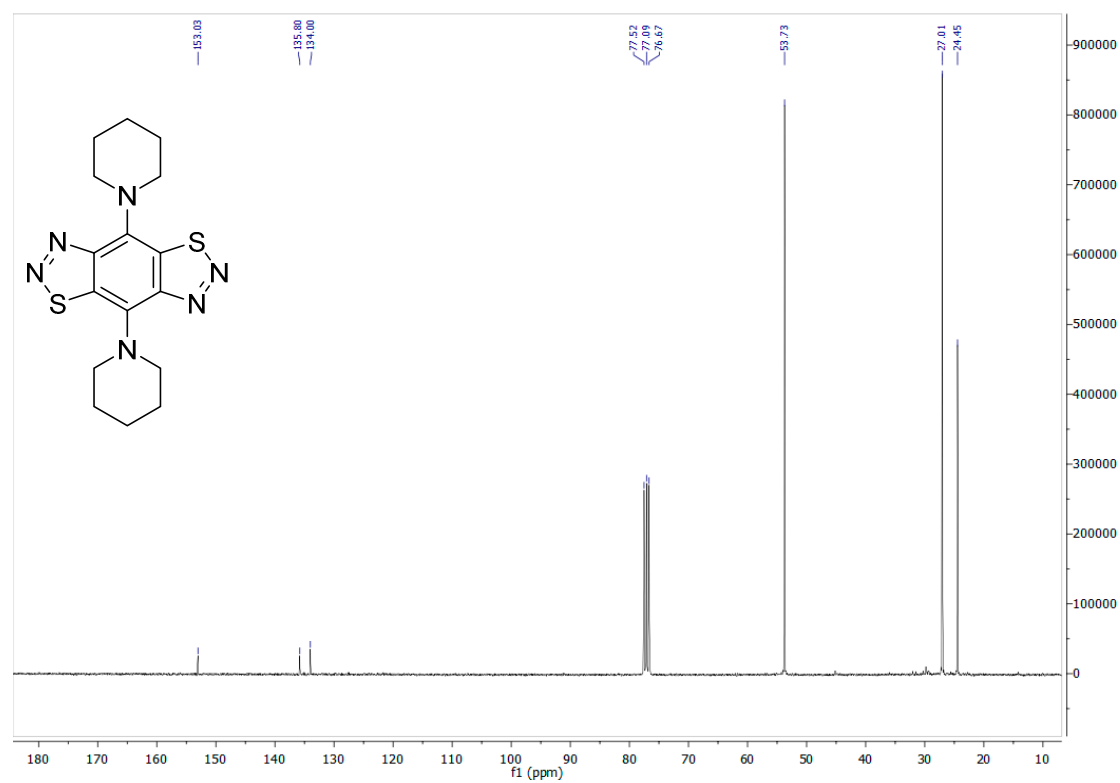

# Display Report

## Analysis Info

Analysis Name D:\Data\Chizhov\Miscellaneous\Rakitin\Chmovzh\tim-547\_&clblow.d  
 Method tune\_low\_1550.m  
 Sample Name /SUSU Tim-547  
 Comment CH3CN 100 %, dil. 200, calibrant added

Acquisition Date 25.08.2022 15:20:18  
 Operator BDAL@DE  
 Instrument / Ser# maxis 43

## Acquisition Parameter

|             |            |                      |          |                  |           |
|-------------|------------|----------------------|----------|------------------|-----------|
| Source Type | ESI        | Ion Polarity         | Positive | Set Nebulizer    | 0.4 Bar   |
| Focus       | Not active |                      |          | Set Dry Heater   | 180 °C    |
| Scan Begin  | 50 m/z     | Set Capillary        | 4500 V   | Set Dry Gas      | 4.0 l/min |
| Scan End    | 1550 m/z   | Set End Plate Offset | -500 V   | Set Divert Valve | Source    |

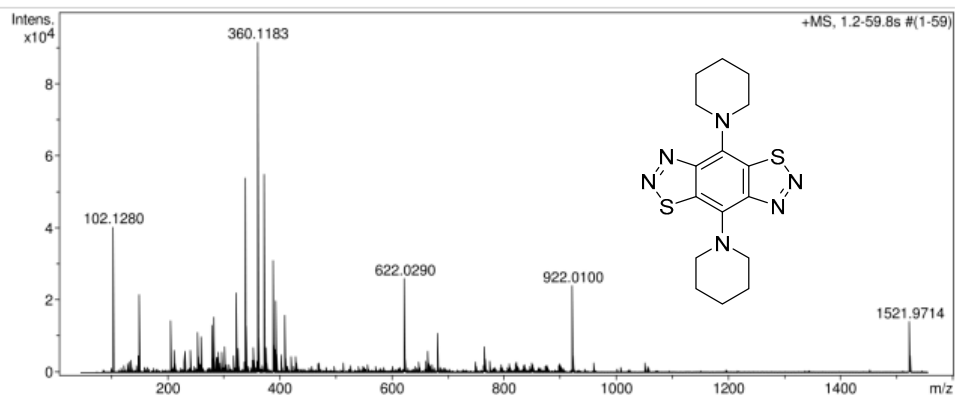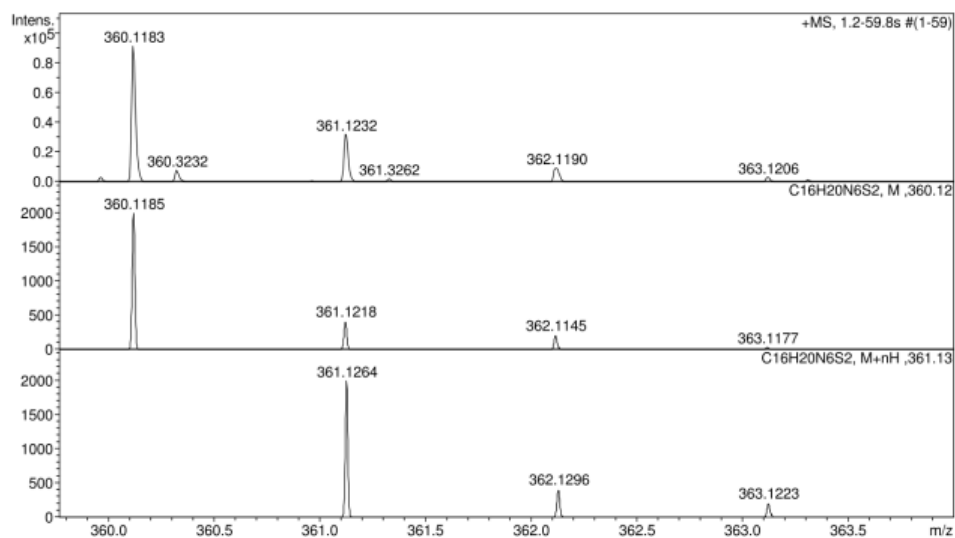

# 4,8-Bis(phenylthio)benzo[1,2-d:4,5-d']bis([1,2,3]thiadiazole) (15a)

$^1\text{H}$  NMR (300 MHz)

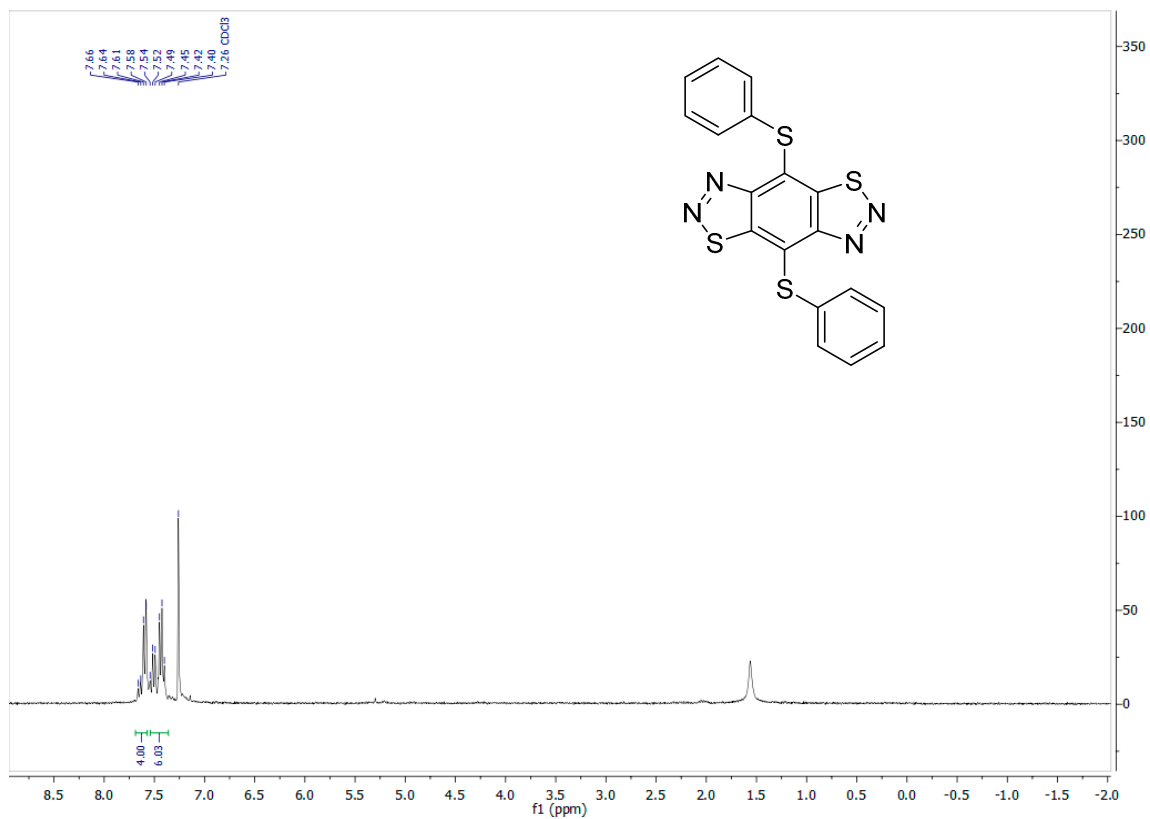

$^{13}\text{C}$  NMR(75 MHz)

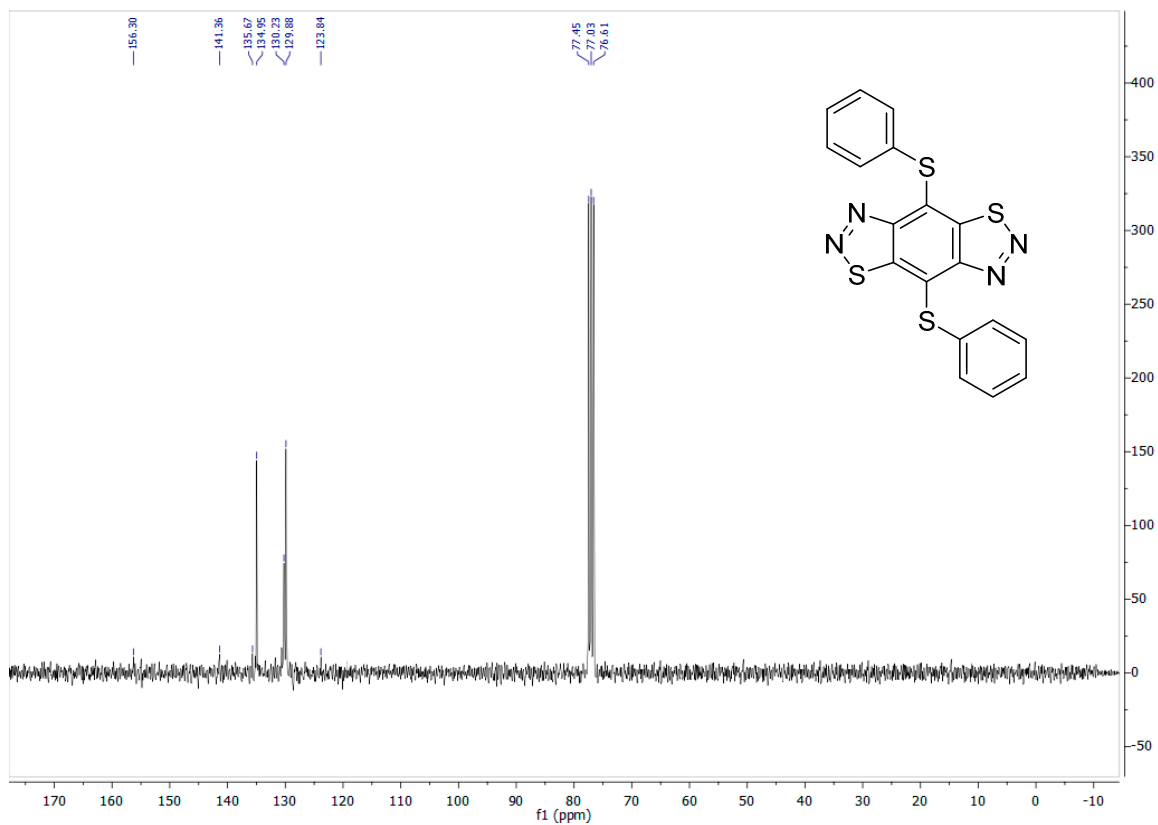

## Display Report

### Analysis Info

Analysis Name D:\Data\Kolotyrkina\2022\Chmovsh\0608028.d  
Method tune\_50-1600\_pos\_15\_12.m  
Sample Name /SUSU Tim-533  
Comment C18H10N4S2 mH 347.0419 clb added CH3CN

Acquisition Date 08.06.2022 16:45:25

Operator BDAL@DE  
Instrument / Ser# micrOTOF 10248

### Acquisition Parameter

|             |            |                      |          |                  |           |
|-------------|------------|----------------------|----------|------------------|-----------|
| Source Type | ESI        | Ion Polarity         | Positive | Set Nebulizer    | 0.4 Bar   |
| Focus       | Not active |                      |          | Set Dry Heater   | 180 °C    |
| Scan Begin  | 50 m/z     | Set Capillary        | 4500 V   | Set Dry Gas      | 4.0 l/min |
| Scan End    | 1600 m/z   | Set End Plate Offset | -500 V   | Set Divert Valve | Waste     |

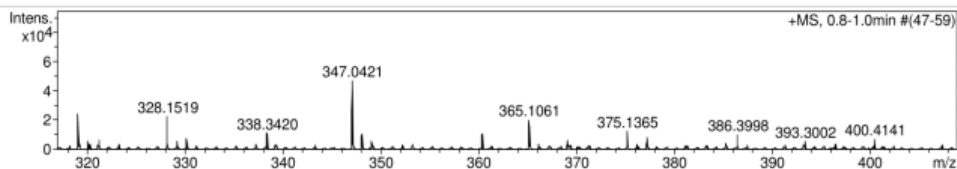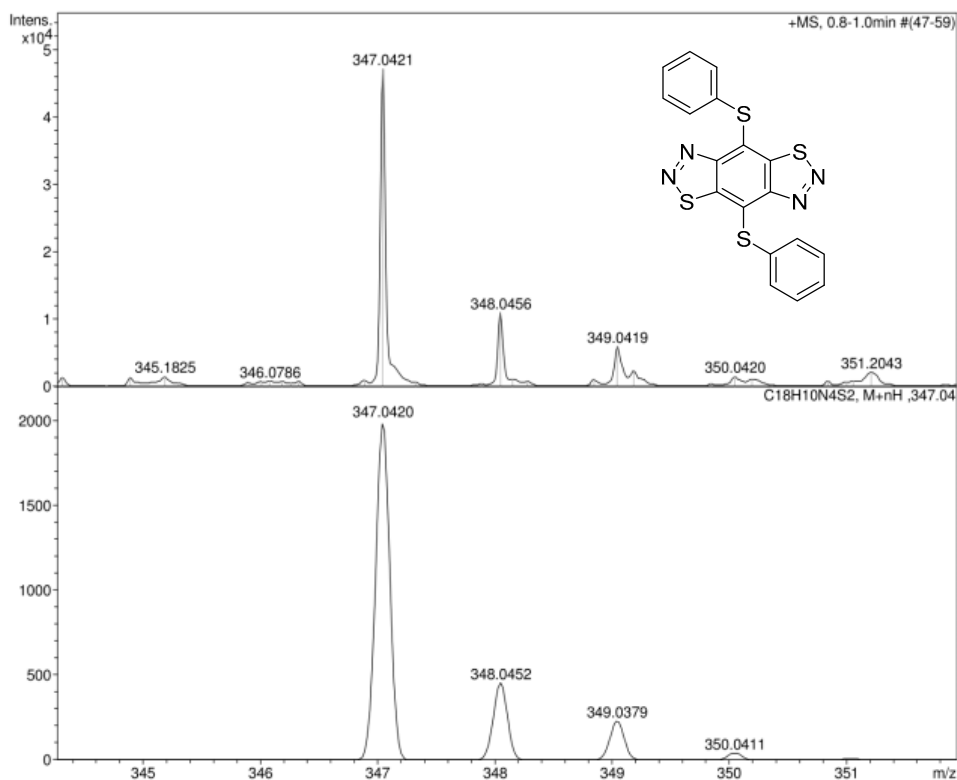

**4,8-Bis(hexylthio)benzo[1,2-d:4,5-d']bis([1,2,3]thiadiazole) (15b)**

**$^1\text{H}$  NMR (300 MHz)**

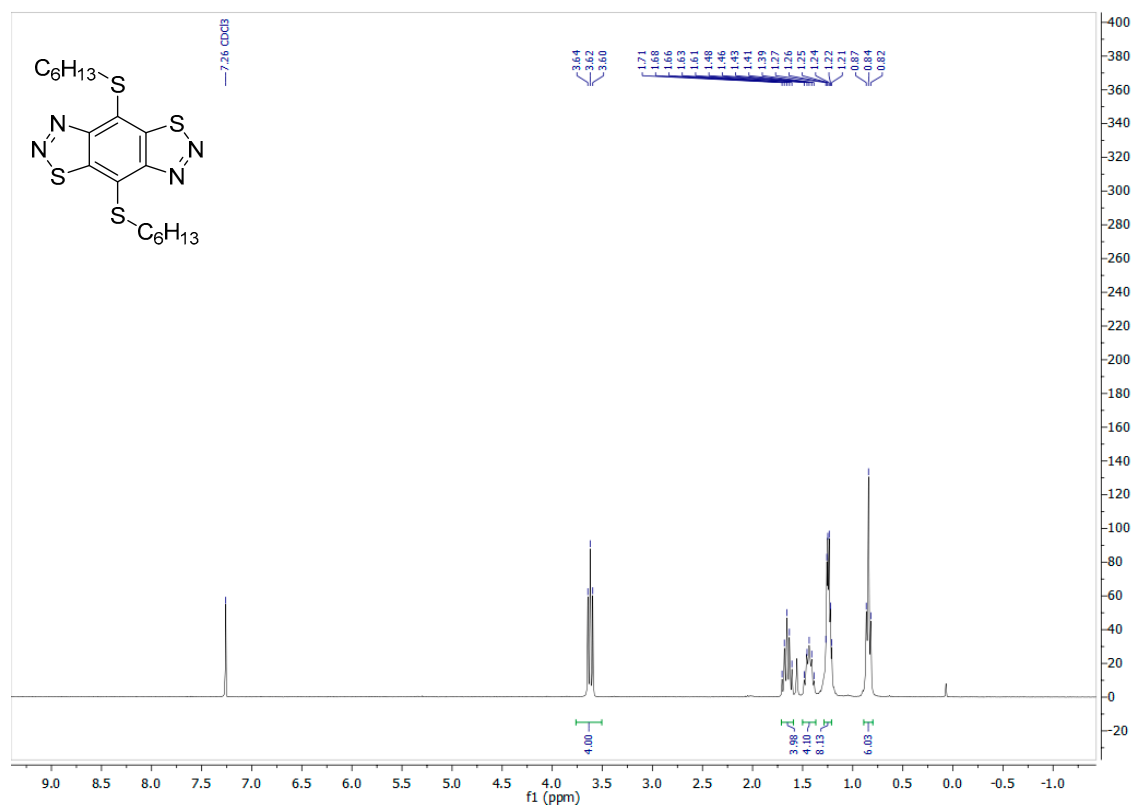

**$^{13}\text{C}$  NMR(75 MHz)**

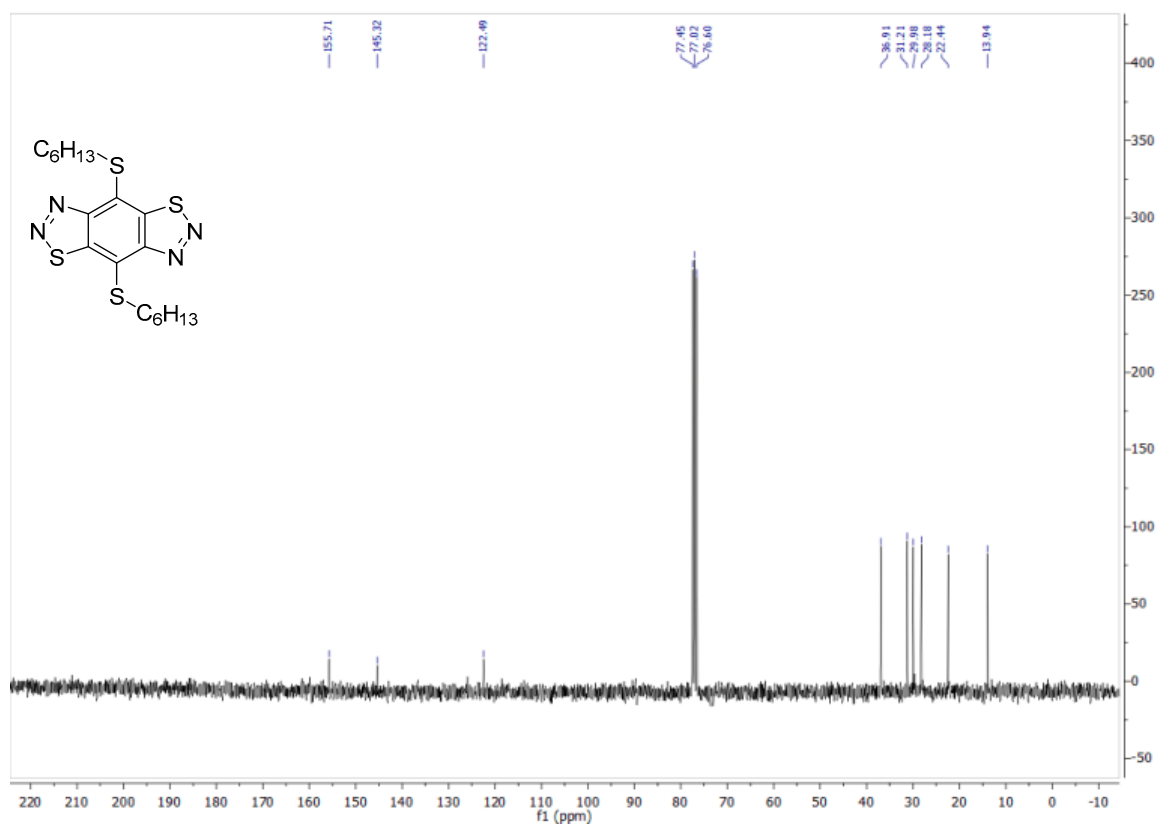



# Display Report

## Analysis Info

Analysis Name D:\Data\Kolotyrkina\2022\Chmovsh\0526020.d  
 Method tune\_50-1600\_pos\_15\_12.m  
 Sample Name /SUSU Tim-526  
 Comment C18H26N4S4 mH 427.1124 calibrant added CH3CN

Acquisition Date 26.05.2022 15:05:39  
 Operator BDAL@DE  
 Instrument / Ser# micrOTOF 10248

## Acquisition Parameter

|             |            |                      |          |                  |           |
|-------------|------------|----------------------|----------|------------------|-----------|
| Source Type | ESI        | Ion Polarity         | Positive | Set Nebulizer    | 0.4 Bar   |
| Focus       | Not active |                      |          | Set Dry Heater   | 180 °C    |
| Scan Begin  | 50 m/z     | Set Capillary        | 4500 V   | Set Dry Gas      | 4.0 l/min |
| Scan End    | 1600 m/z   | Set End Plate Offset | -500 V   | Set Divert Valve | Waste     |

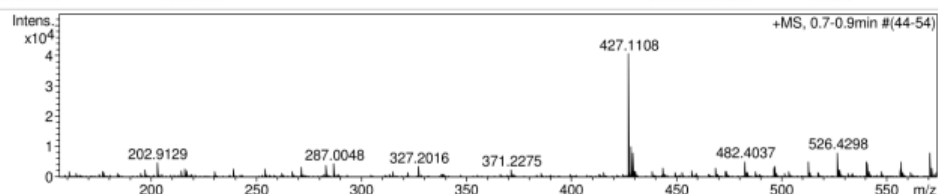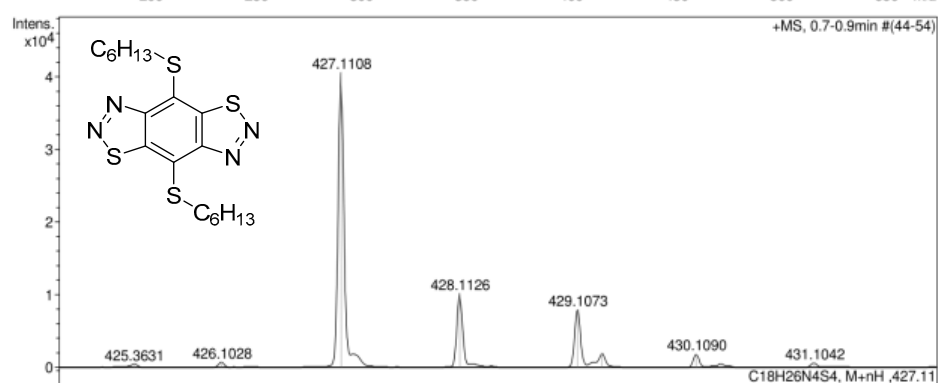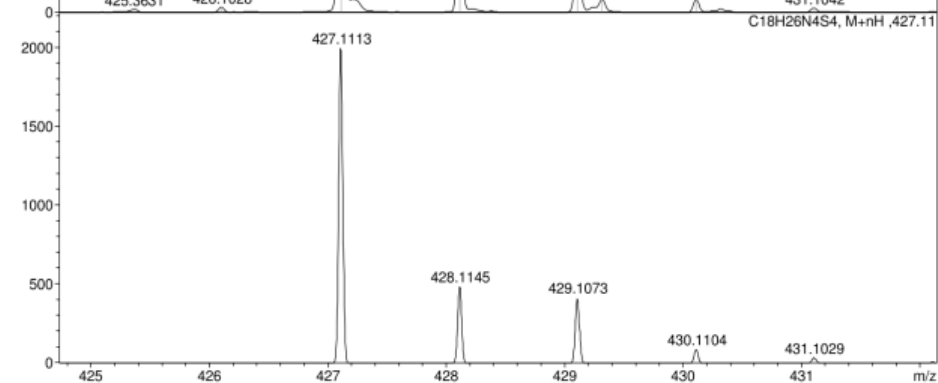

# 4,8-Bis(dodecylthio)benzo[1,2-d:4,5-d']bis([1,2,3]thiadiazole) (15c)

$^1\text{H}$  NMR (300 MHz)

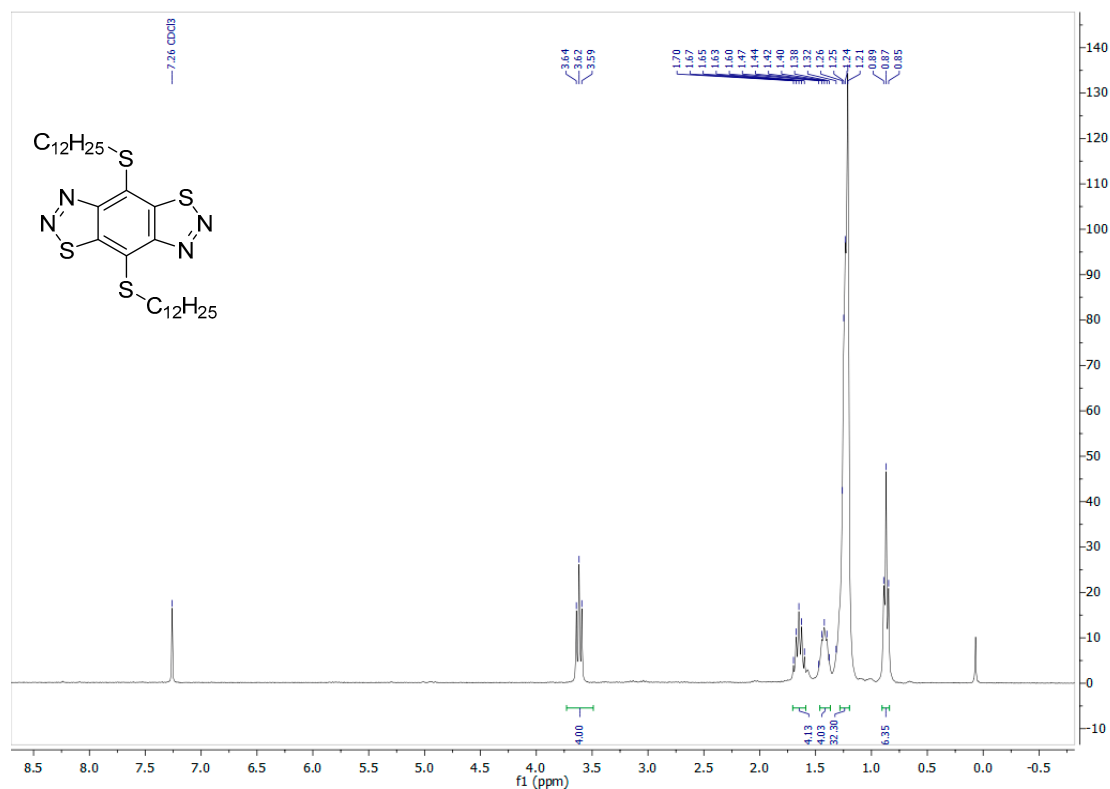

$^{13}\text{C}$  NMR (75 MHz)

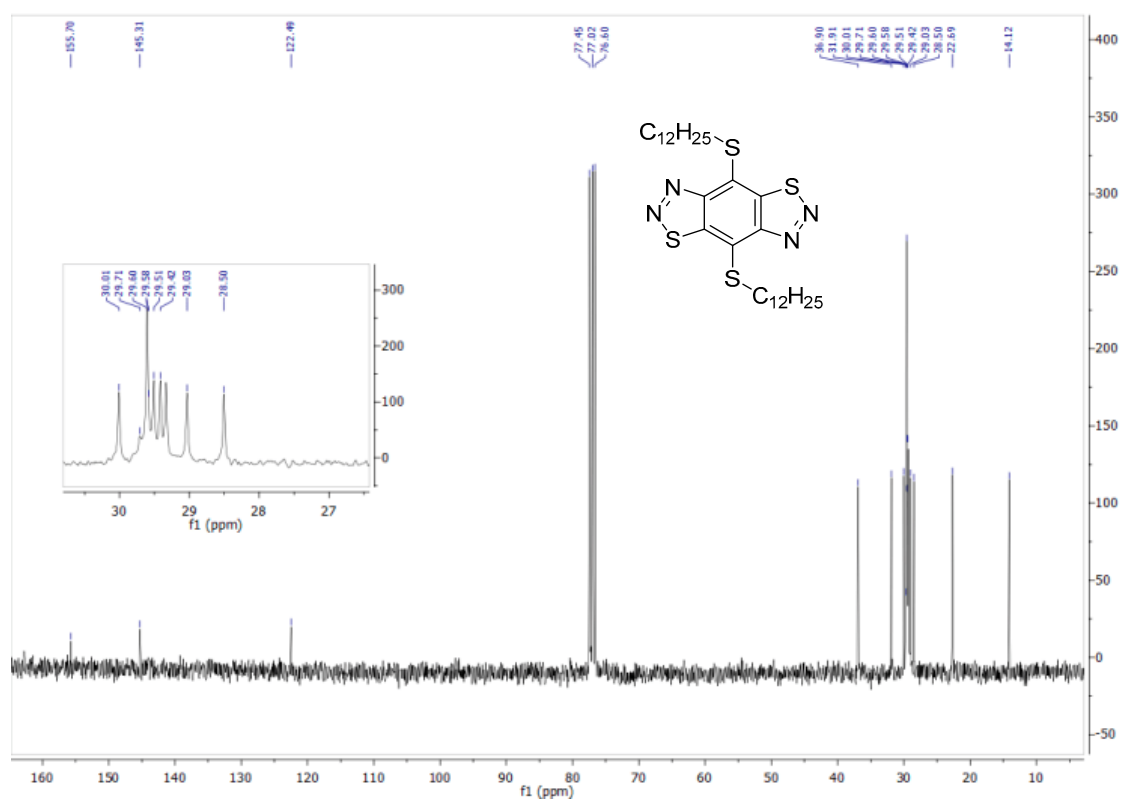

## Display Report

### Analysis Info

Analysis Name D:\Data\Kolotyrkina\2022\Chmovsh\0526023.d  
Method tune\_50-1600\_pos\_15\_12.m  
Sample Name /SUSU Tim-527  
Comment C30H50N4S4 mH 595.3002 calibrant added CH3CN

Acquisition Date 26.05.2022 15:27:22

Operator BDAL@DE  
Instrument / Ser# micrOTOF 10248

### Acquisition Parameter

|             |            |                      |          |                  |           |
|-------------|------------|----------------------|----------|------------------|-----------|
| Source Type | ESI        | Ion Polarity         | Positive | Set Nebulizer    | 0.4 Bar   |
| Focus       | Not active |                      |          | Set Dry Heater   | 180 °C    |
| Scan Begin  | 50 m/z     | Set Capillary        | 4500 V   | Set Dry Gas      | 4.0 l/min |
| Scan End    | 1600 m/z   | Set End Plate Offset | -500 V   | Set Divert Valve | Waste     |

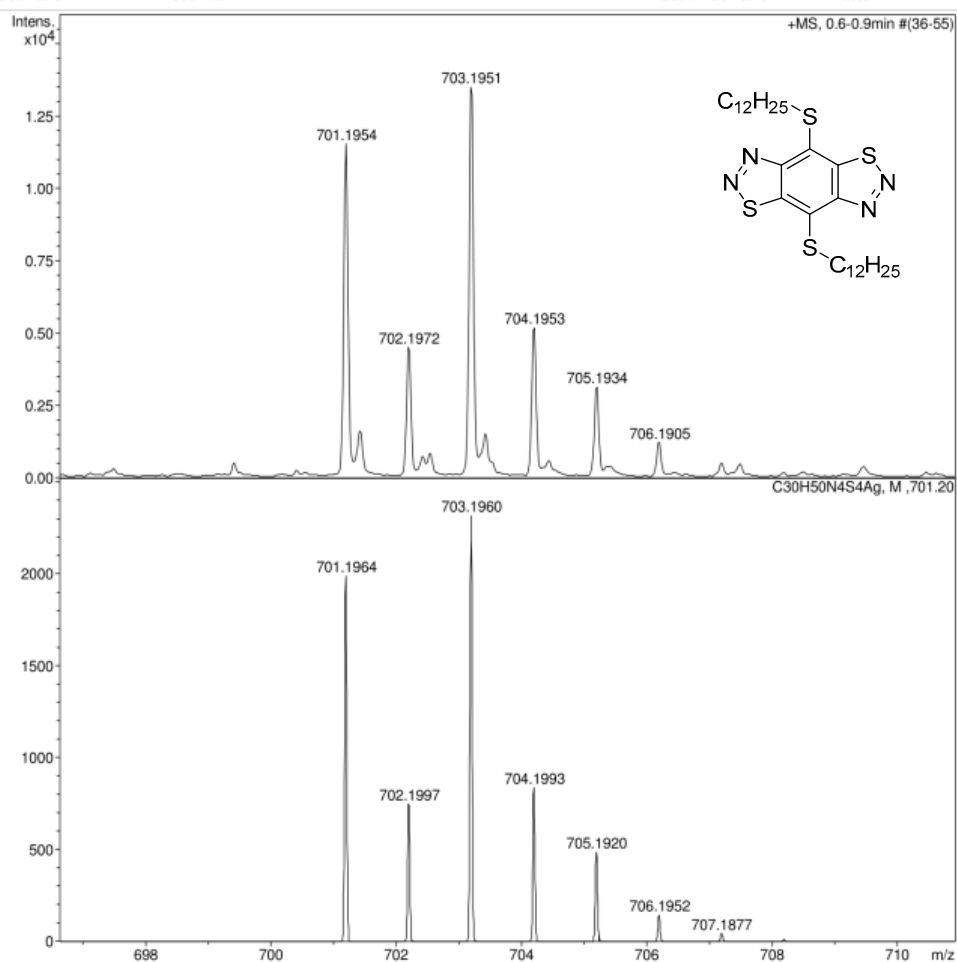

# 4-Bromo-8-(thiophen-2-yl)benzo[1,2-d:4,5-d']bis([1,2,3]thiadiazole) (18a)

$^1\text{H}$  NMR (300 MHz)

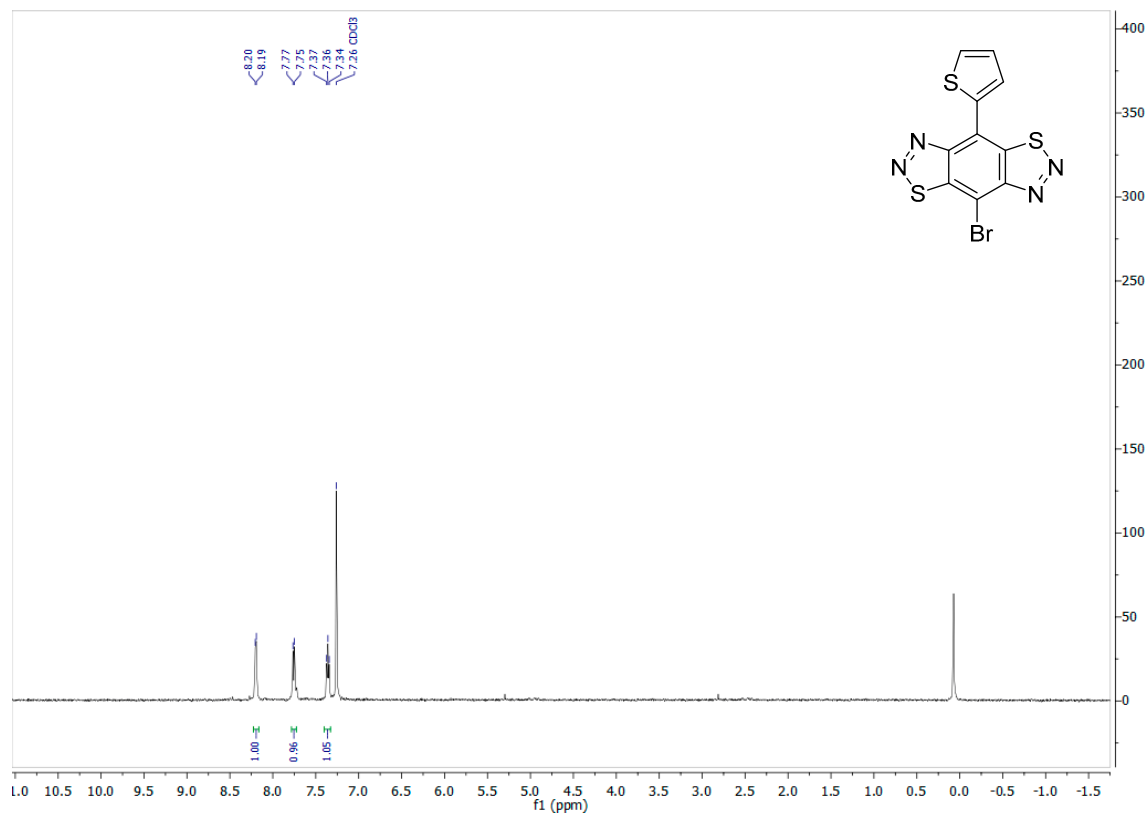

$^{13}\text{C}$  NMR (75 MHz)

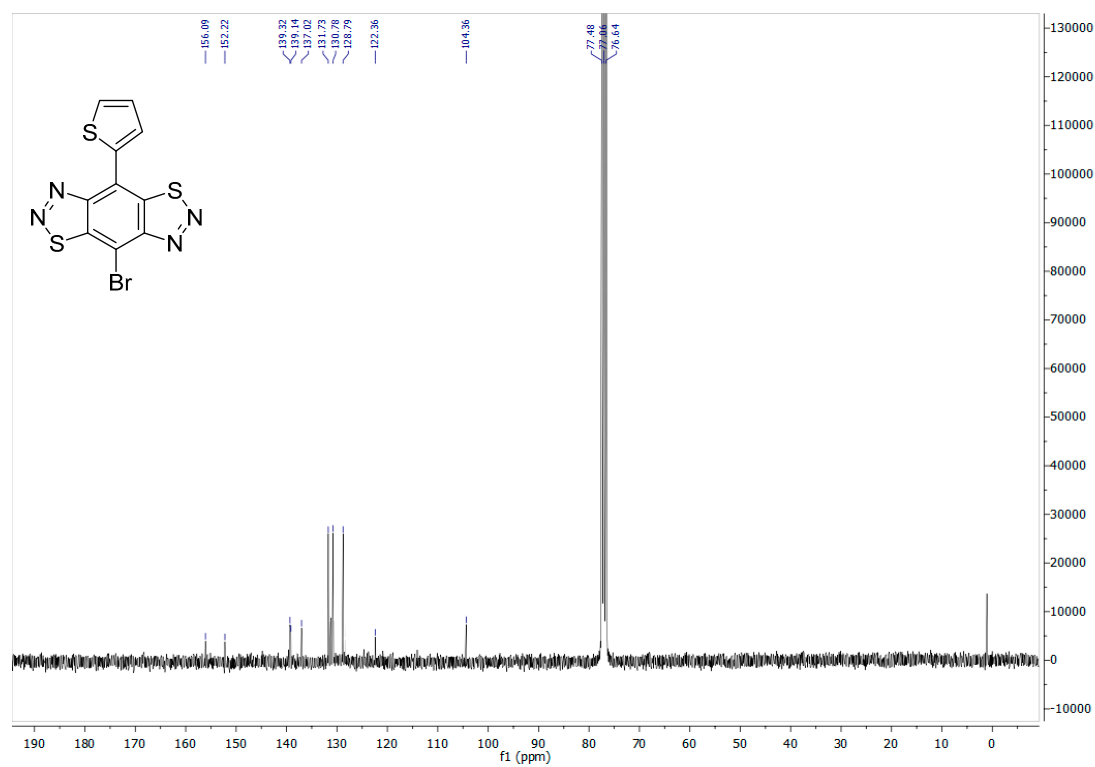

## Display Report

### Analysis Info

Analysis Name D:\Data\Kolotyrkina\2022\Kudryashov\0920002.d  
 Method tune\_50-1600\_pos\_15\_12.m  
 Sample Name /SUSU Tim-554  
 Comment C10H3BrN4S3 mH 354.8775 calibrant added CH3CN

Acquisition Date 20.09.2022 11:28:31

Operator BDAL@DE  
 Instrument / Ser# micrOTOF 10248

### Acquisition Parameter

|             |            |                      |          |                  |           |
|-------------|------------|----------------------|----------|------------------|-----------|
| Source Type | ESI        | Ion Polarity         | Positive | Set Nebulizer    | 0.4 Bar   |
| Focus       | Not active |                      |          | Set Dry Heater   | 180 °C    |
| Scan Begin  | 50 m/z     | Set Capillary        | 4500 V   | Set Dry Gas      | 4.0 l/min |
| Scan End    | 1600 m/z   | Set End Plate Offset | -500 V   | Set Divert Valve | Waste     |

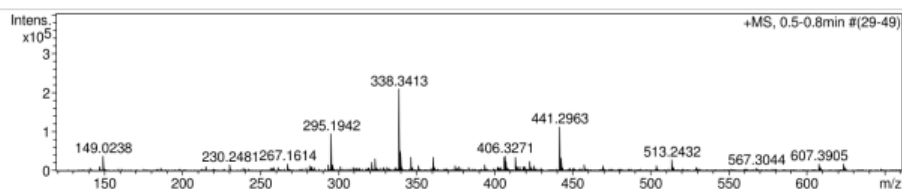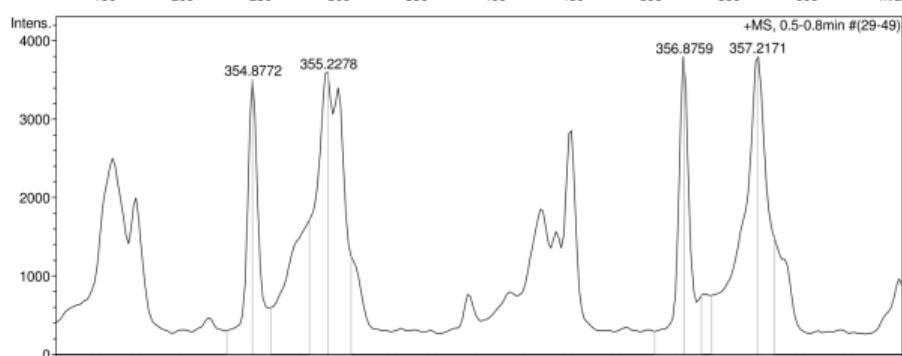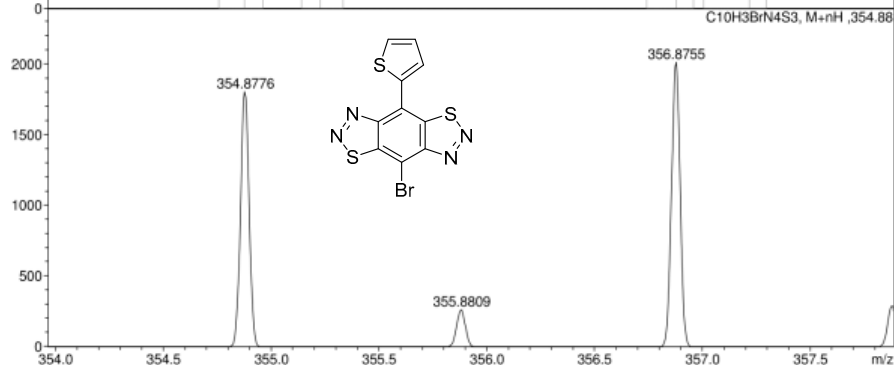

**4-Bromo-8-(4-hexylthiophen-2-yl)benzo[1,2-d:4,5-d']bis([1,2,3]thiadiazole) (18b)**

**<sup>1</sup>H NMR (300 MHz)**

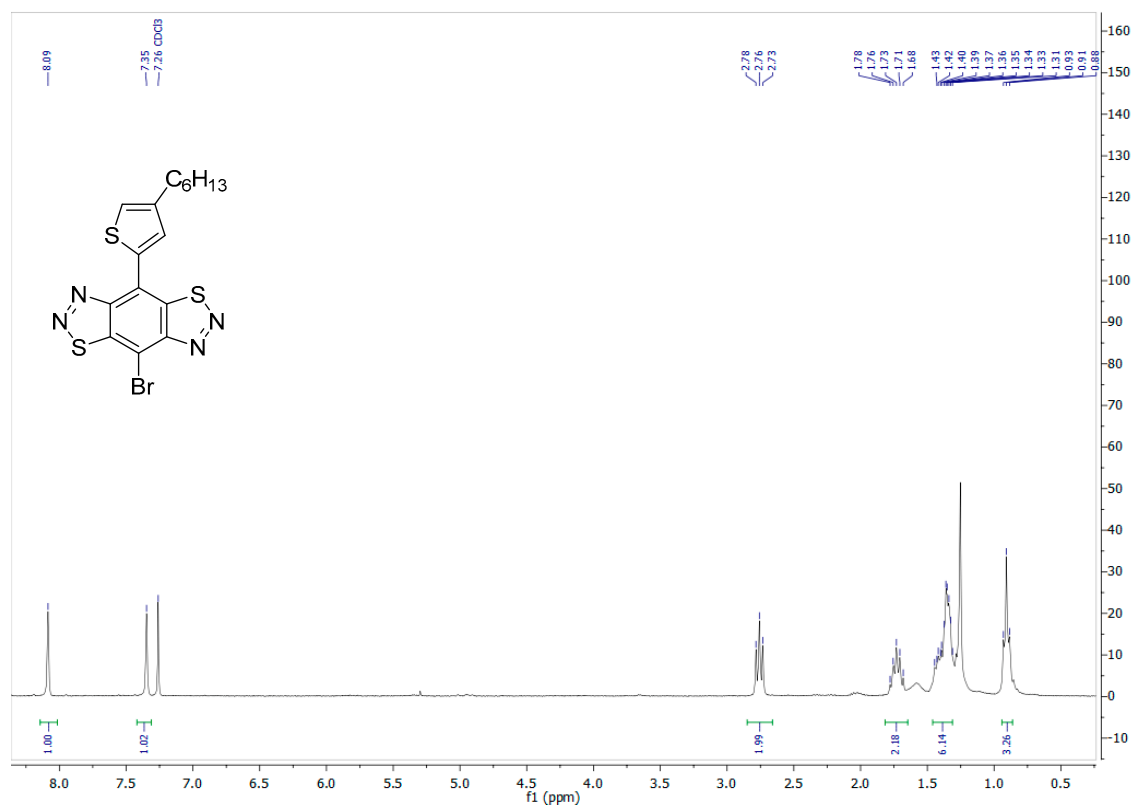

**<sup>13</sup>C NMR(75 MHz)**

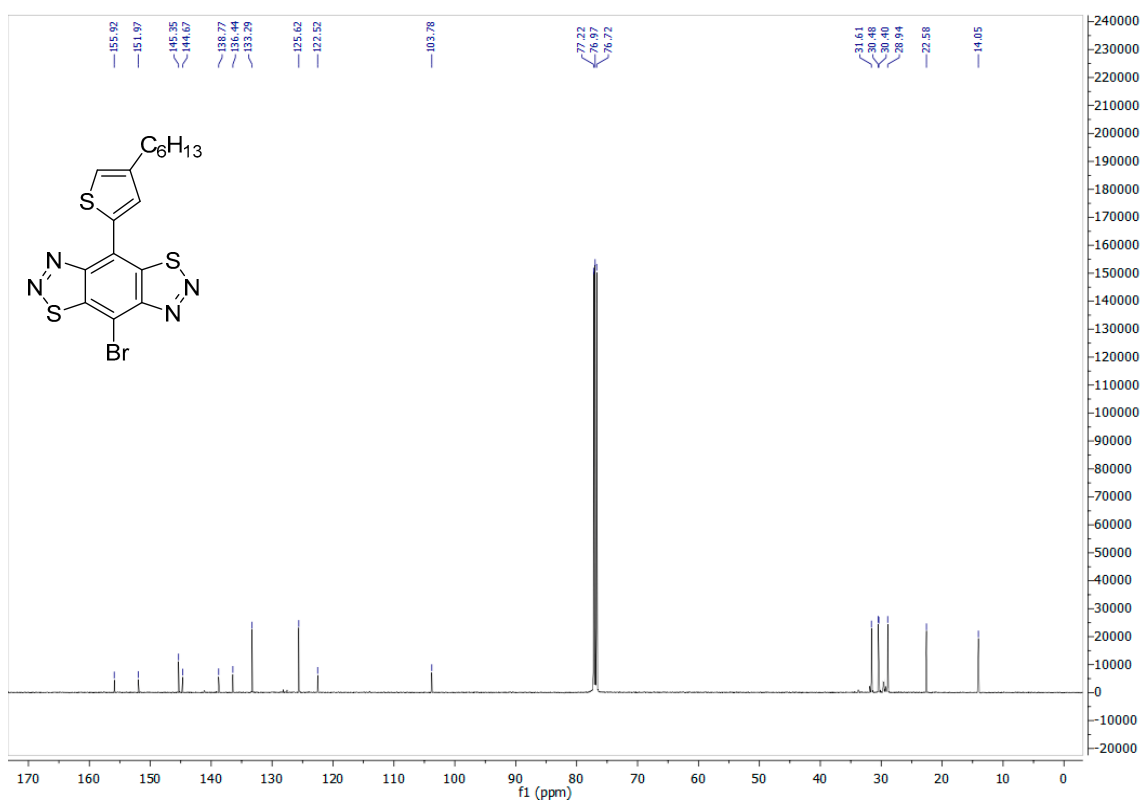

# Display Report

## Analysis Info

Analysis Name D:\Data\Kolotyrkina\2022\Chmovsh\0707035.d  
 Method tune\_50-1600\_pos\_15\_12.m  
 Sample Name /SUSU Tim-537  
 Comment C16H15BrN4S3 mH 438.9714 calibrant added CH3CN

Acquisition Date 07.07.2022 16:59:13

Operator BDAL@DE  
 Instrument / Ser# micrOTOF 10248

## Acquisition Parameter

|             |            |                      |          |                  |           |
|-------------|------------|----------------------|----------|------------------|-----------|
| Source Type | ESI        | Ion Polarity         | Positive | Set Nebulizer    | 0.4 Bar   |
| Focus       | Not active |                      |          | Set Dry Heater   | 180 °C    |
| Scan Begin  | 50 m/z     | Set Capillary        | 4500 V   | Set Dry Gas      | 4.0 l/min |
| Scan End    | 1600 m/z   | Set End Plate Offset | -500 V   | Set Divert Valve | Waste     |

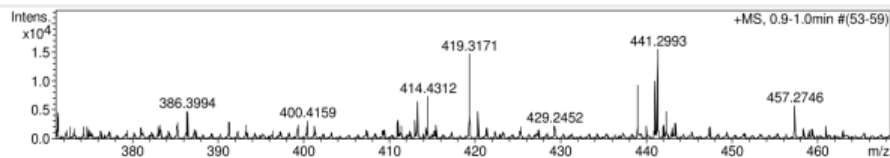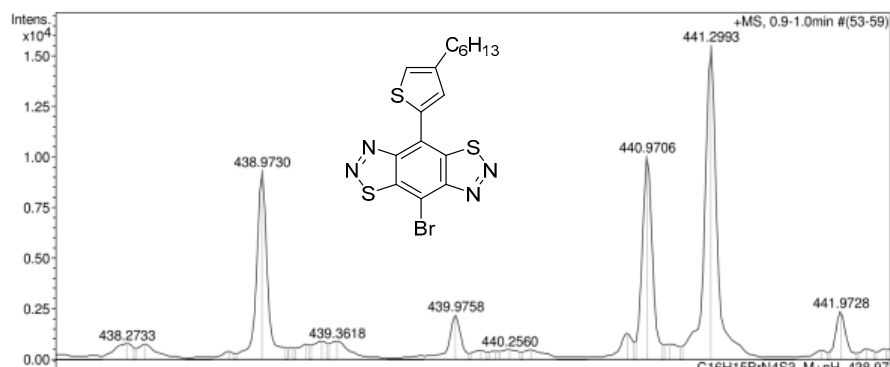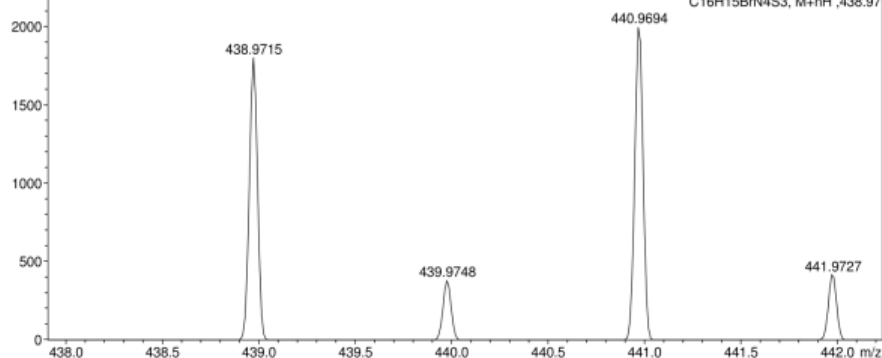



4-([2,2'-Bithiophen]-5-yl)-8-bromobenzo[1,2-d:4,5-d']bis([1,2,3]thiadiazole) (18c)

$^1\text{H}$  NMR (300 MHz)

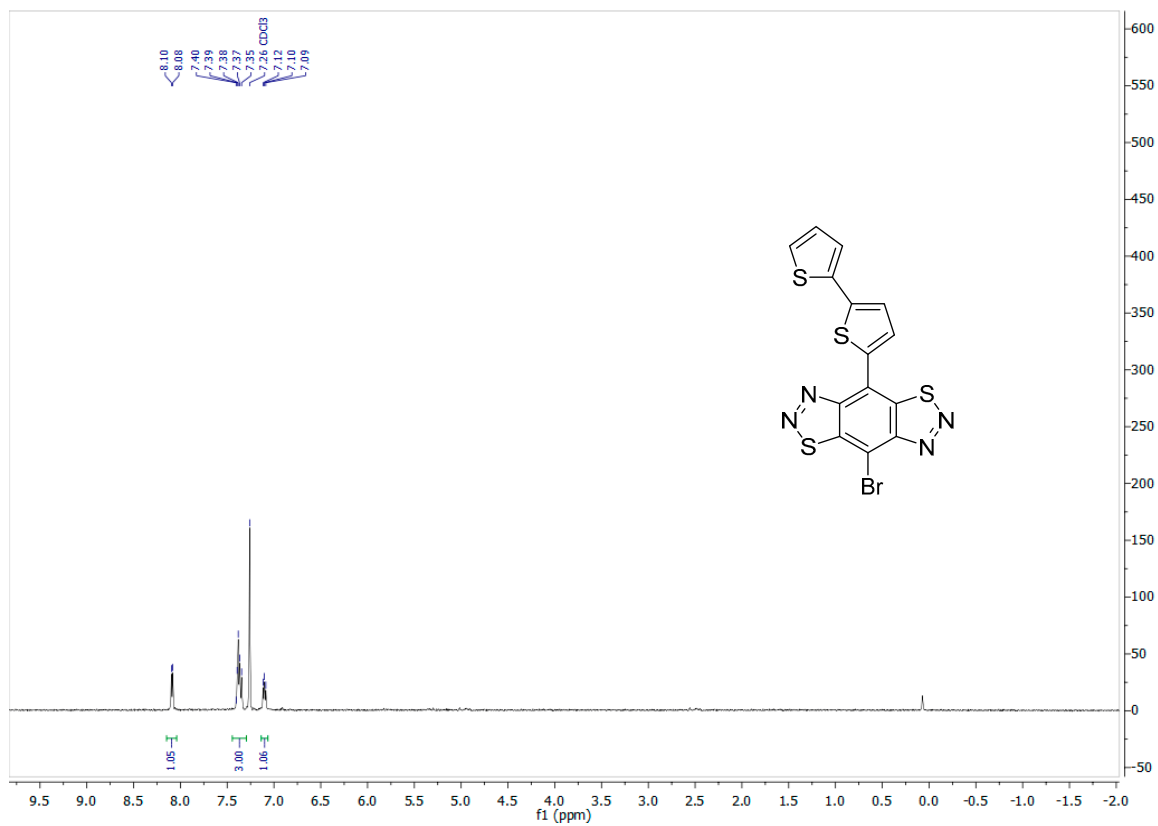

$^{13}\text{C}$  NMR (75 MHz)

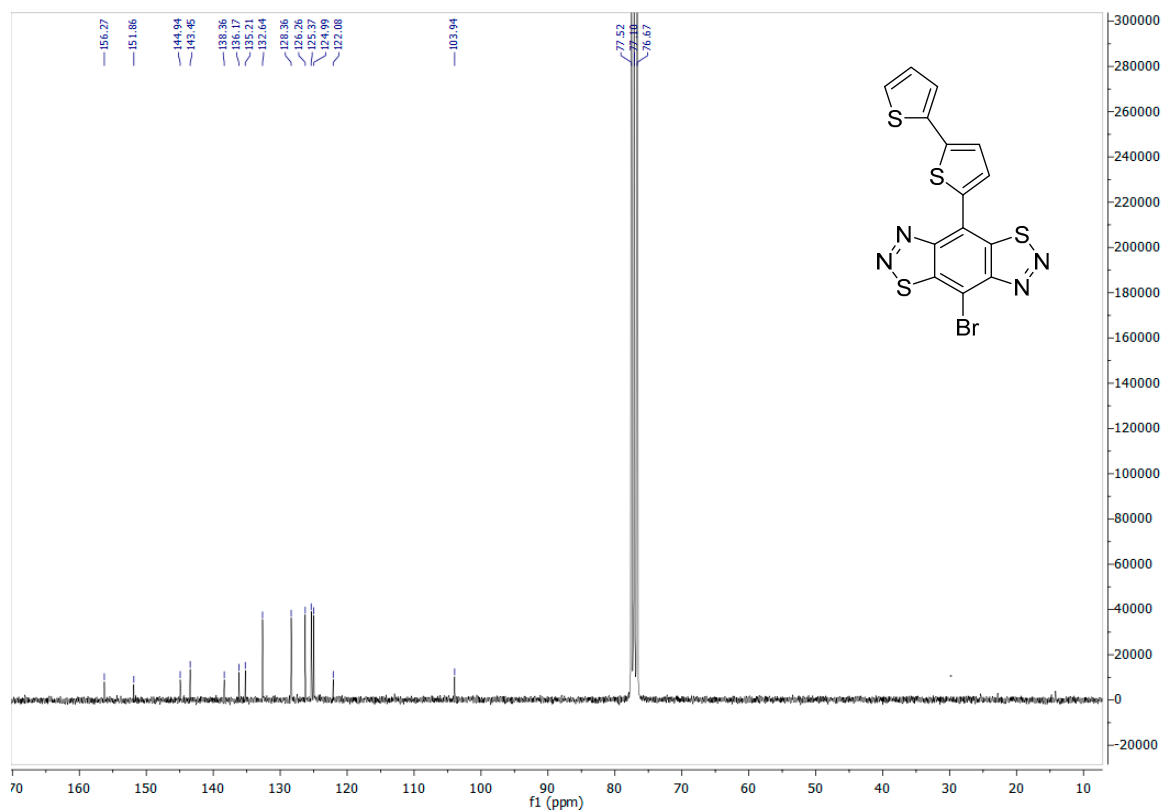

# Display Report

## Analysis Info

Analysis Name D:\Data\Chizhov\Rakitin\Chmovzh\tim-535\_&clb.d  
 Method tune\_wide.m  
 Sample Name /SUSU Tim-535  
 Comment CH3CN 100 %, dil. 20, calibrant added

Acquisition Date 29.06.2022 11:45:24

Operator BDAL@DE  
 Instrument / Ser# micrOTOF 10248

## Acquisition Parameter

|             |            |                      |          |                  |           |
|-------------|------------|----------------------|----------|------------------|-----------|
| Source Type | ESI        | Ion Polarity         | Positive | Set Nebulizer    | 0.4 Bar   |
| Focus       | Not active |                      |          | Set Dry Heater   | 180 °C    |
| Scan Begin  | 50 m/z     | Set Capillary        | 4500 V   | Set Dry Gas      | 4.0 l/min |
| Scan End    | 3000 m/z   | Set End Plate Offset | -500 V   | Set Divert Valve | Waste     |

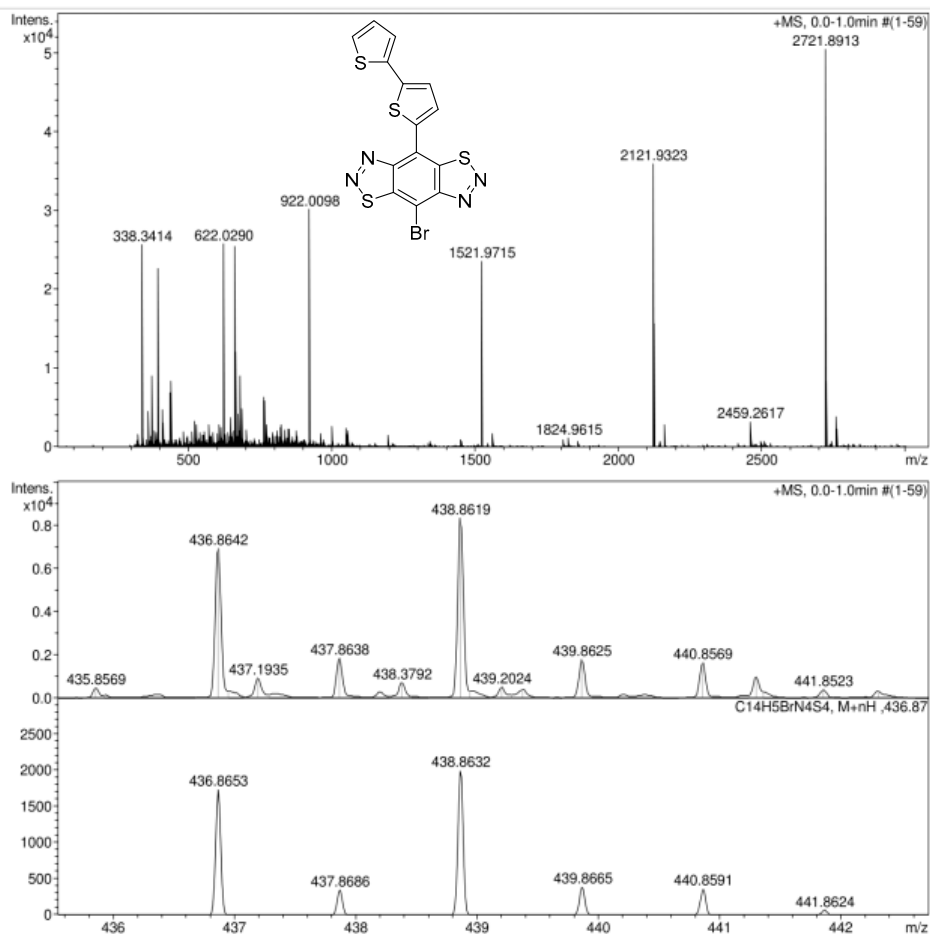

**4-Bromo-8-(5-(2-ethylhexyl)thiophen-2-yl)benzo[1,2-d:4,5-d']bis([1,2,3]thiadiazole)  
(18d)**

**<sup>1</sup>H NMR (300 MHz)**

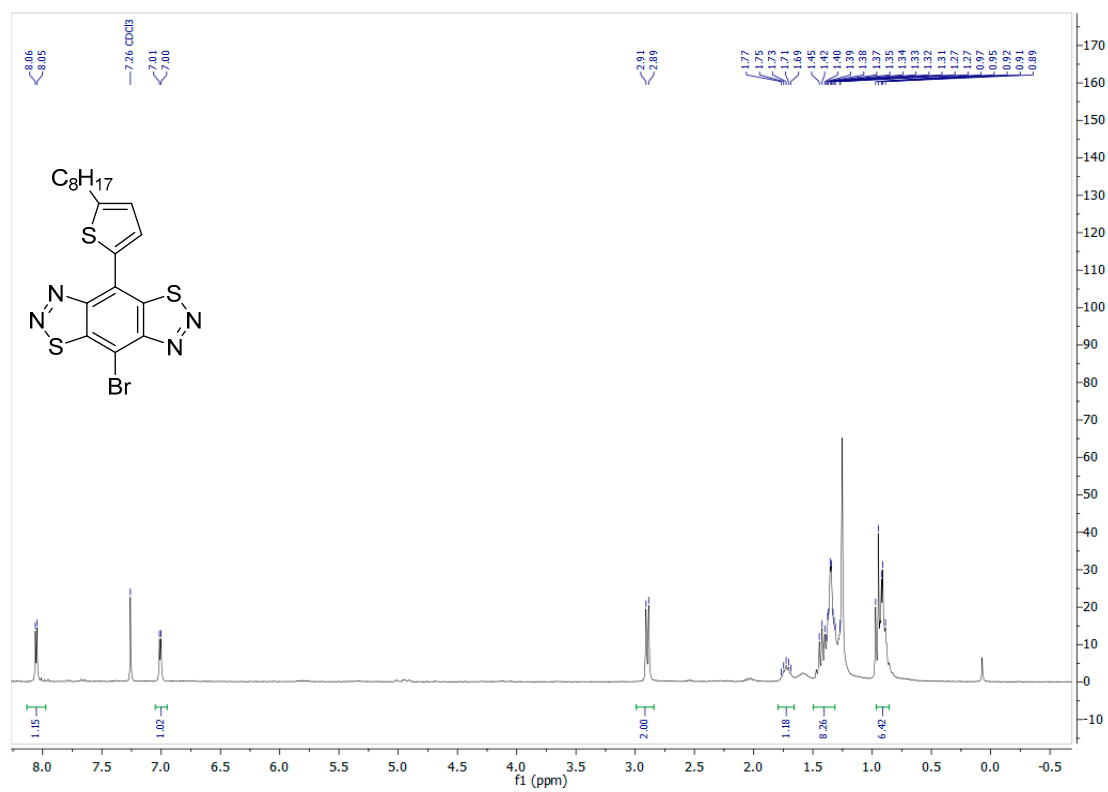

**<sup>13</sup>C NMR(75 MHz)**

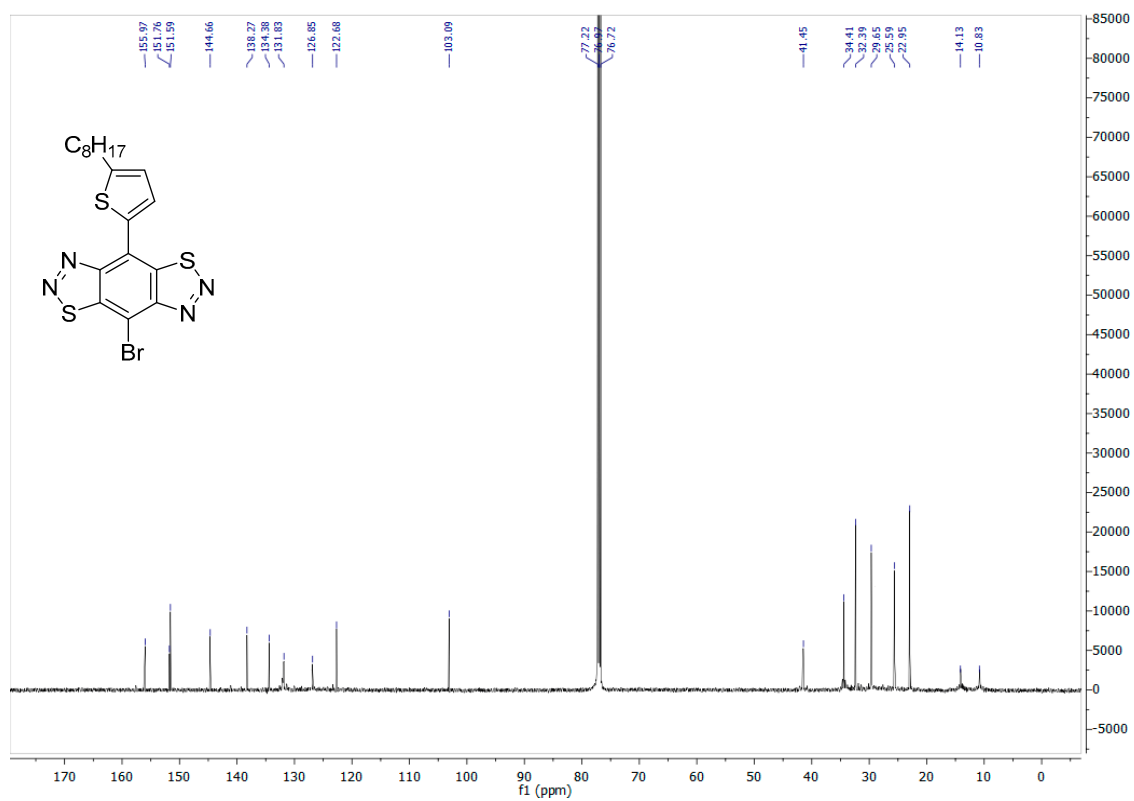

# Display Report

## Analysis Info

Analysis Name D:\Data\Chizhov\Miscellaneous\Rakitin\Chmovzh\tim-549\_&clblow.d  
 Method tune\_low\_1550.m  
 Sample Name /SUSU Tim-549  
 Comment CH3CN 100 %, dil. 20, calibrant added

Acquisition Date 25.08.2022 15:40:33  
 Operator BDAL@DE  
 Instrument / Ser# maXis 43

## Acquisition Parameter

|             |            |                      |          |                  |           |
|-------------|------------|----------------------|----------|------------------|-----------|
| Source Type | ESI        | Ion Polarity         | Positive | Set Nebulizer    | 0.4 Bar   |
| Focus       | Not active |                      |          | Set Dry Heater   | 180 °C    |
| Scan Begin  | 50 m/z     | Set Capillary        | 4500 V   | Set Dry Gas      | 4.0 l/min |
| Scan End    | 1550 m/z   | Set End Plate Offset | -500 V   | Set Divert Valve | Source    |

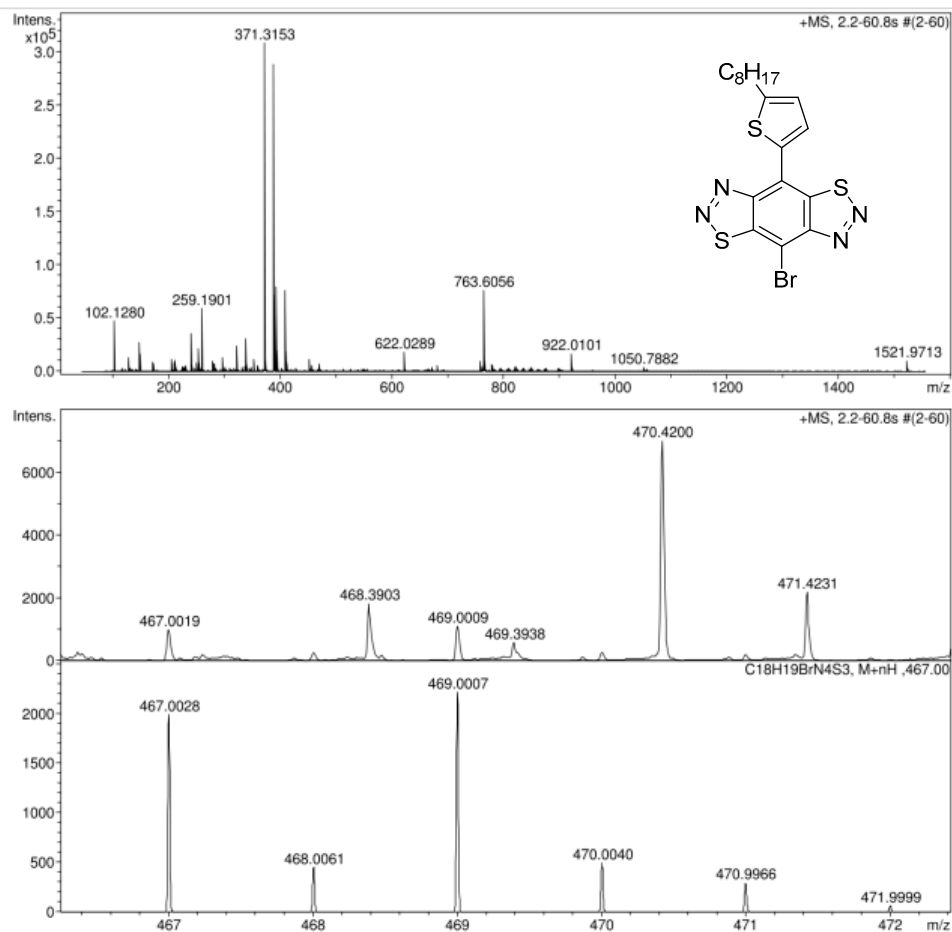

**4-Bromo-8-phenylbenzo[1,2-d:4,5-d']bis([1,2,3]thiadiazole) (18e)**

**$^1\text{H}$  NMR (300 MHz)**

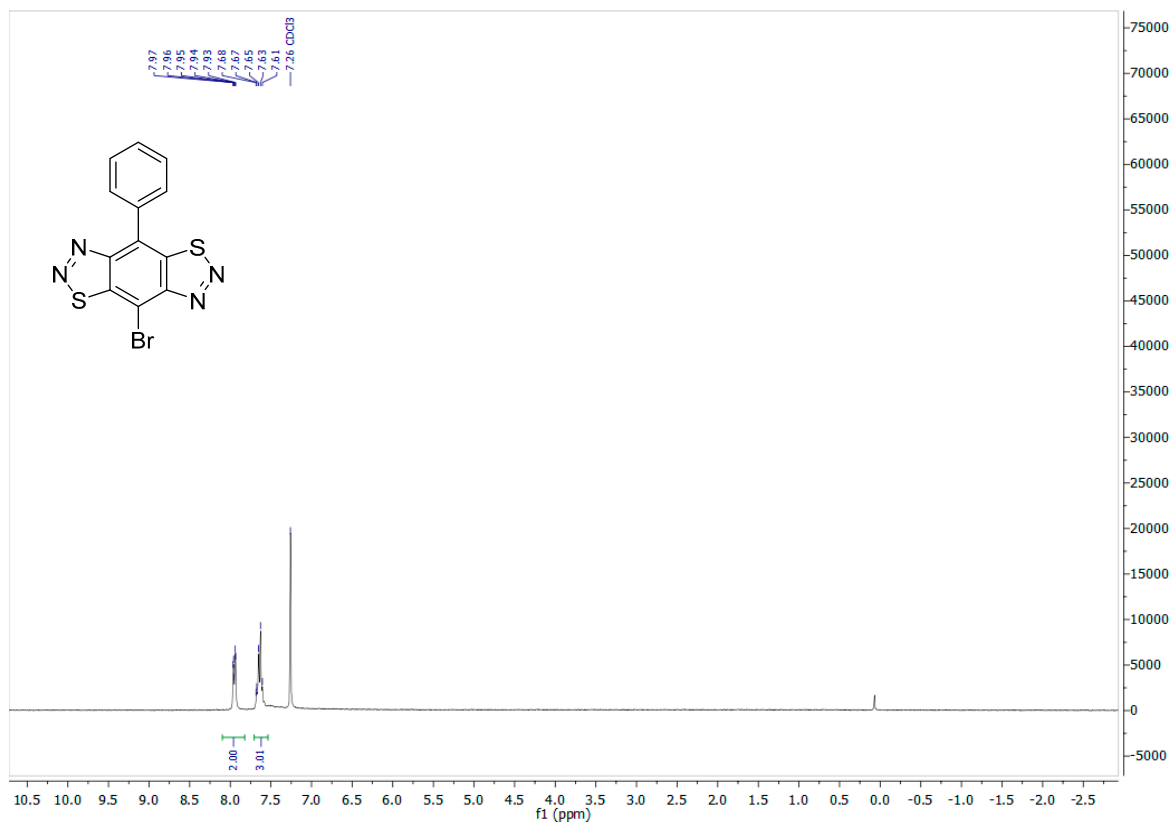

**$^{13}\text{C}$  NMR (75 MHz)**

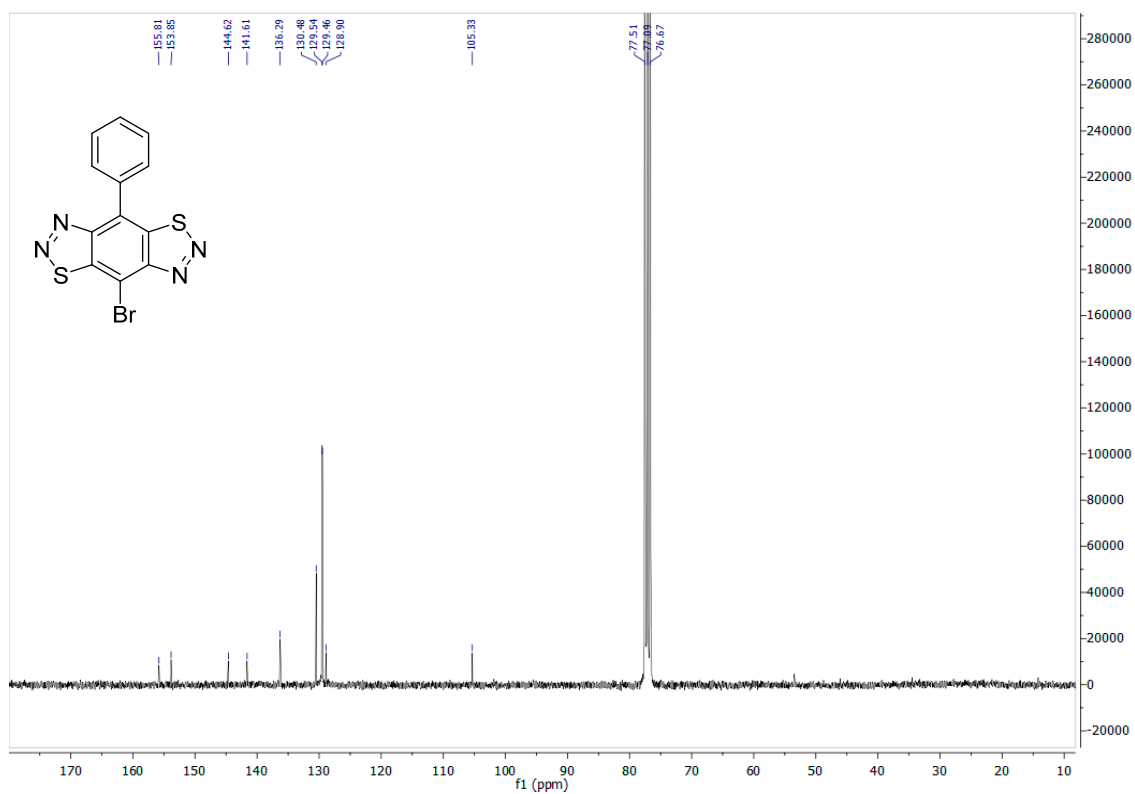

# Display Report

## Analysis Info

Analysis Name D:\Data\Kolotyrykina\2022\Chmovsh\0921004.d  
 Method tune\_50-1600\_pos\_15\_12.m  
 Sample Name /SUSU Tim-556  
 Comment C12H5BrN4S2 mH 348.9211 calibrant added CH3OH

Acquisition Date 21.09.2022 10:25:32

Operator BDAL@DE  
 Instrument / Ser# micrOTOF 10248

## Acquisition Parameter

|             |            |                      |          |                  |           |
|-------------|------------|----------------------|----------|------------------|-----------|
| Source Type | ESI        | Ion Polarity         | Positive | Set Nebulizer    | 0.4 Bar   |
| Focus       | Not active |                      |          | Set Dry Heater   | 180 °C    |
| Scan Begin  | 50 m/z     | Set Capillary        | 4500 V   | Set Dry Gas      | 4.0 l/min |
| Scan End    | 1600 m/z   | Set End Plate Offset | -500 V   | Set Divert Valve | Waste     |

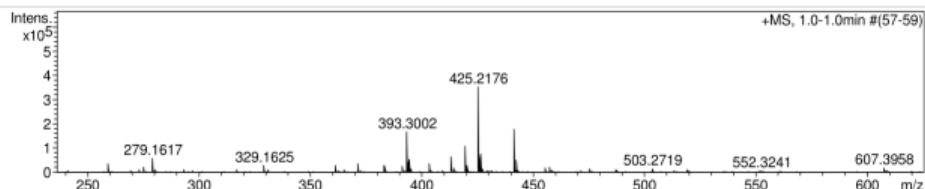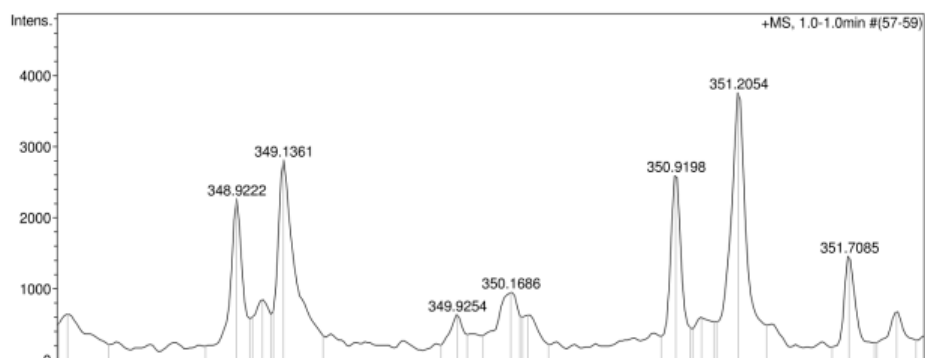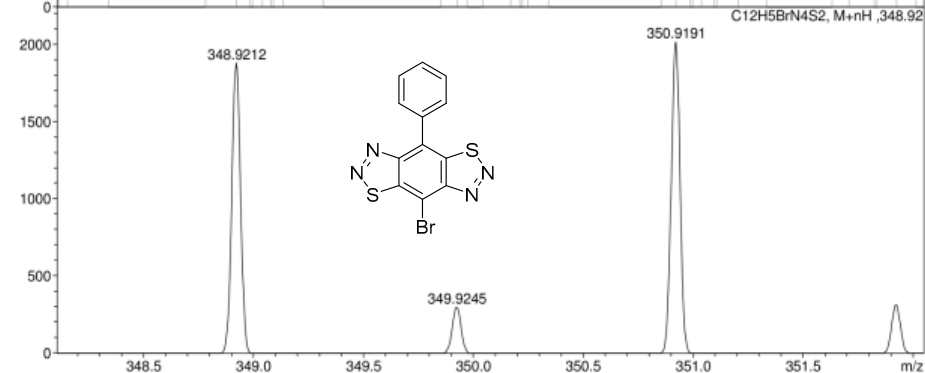



**8-Bromo-4-(p-tolyl)benzo[1,2-d:5,4-d']bis([1,2,3]thiadiazole) (18f)**

**$^1\text{H}$  NMR (300 MHz)**

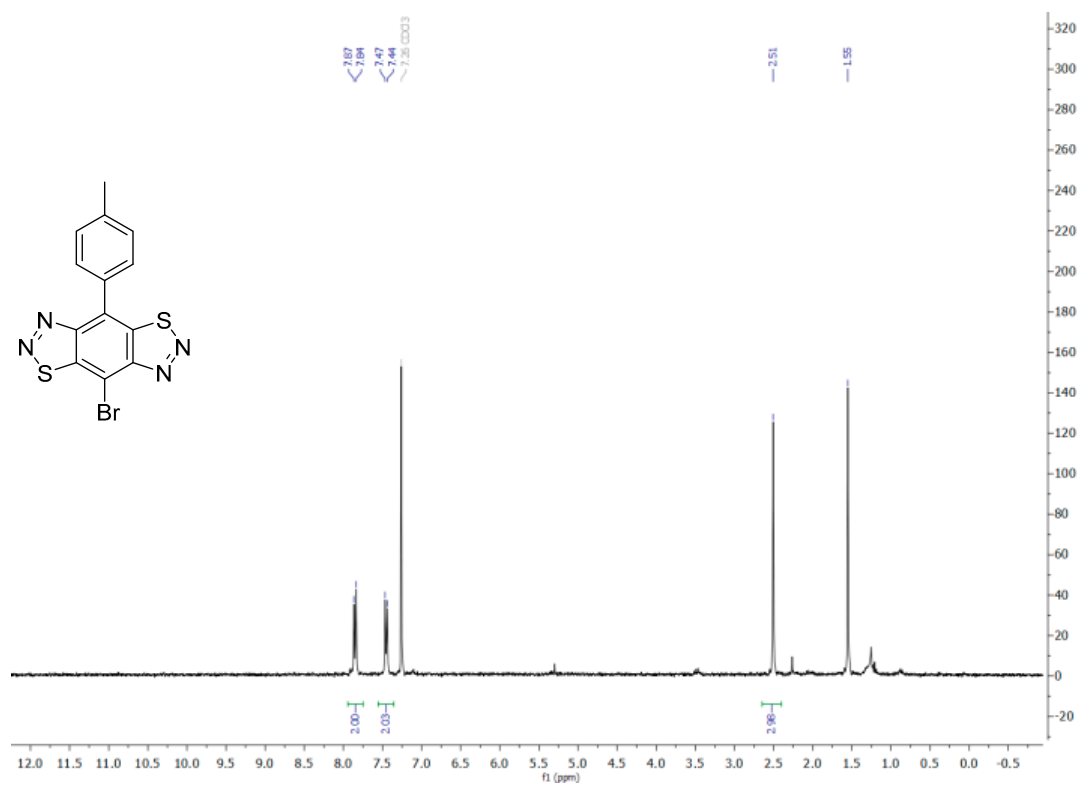

**$^{13}\text{C}$  NMR (75 MHz)**

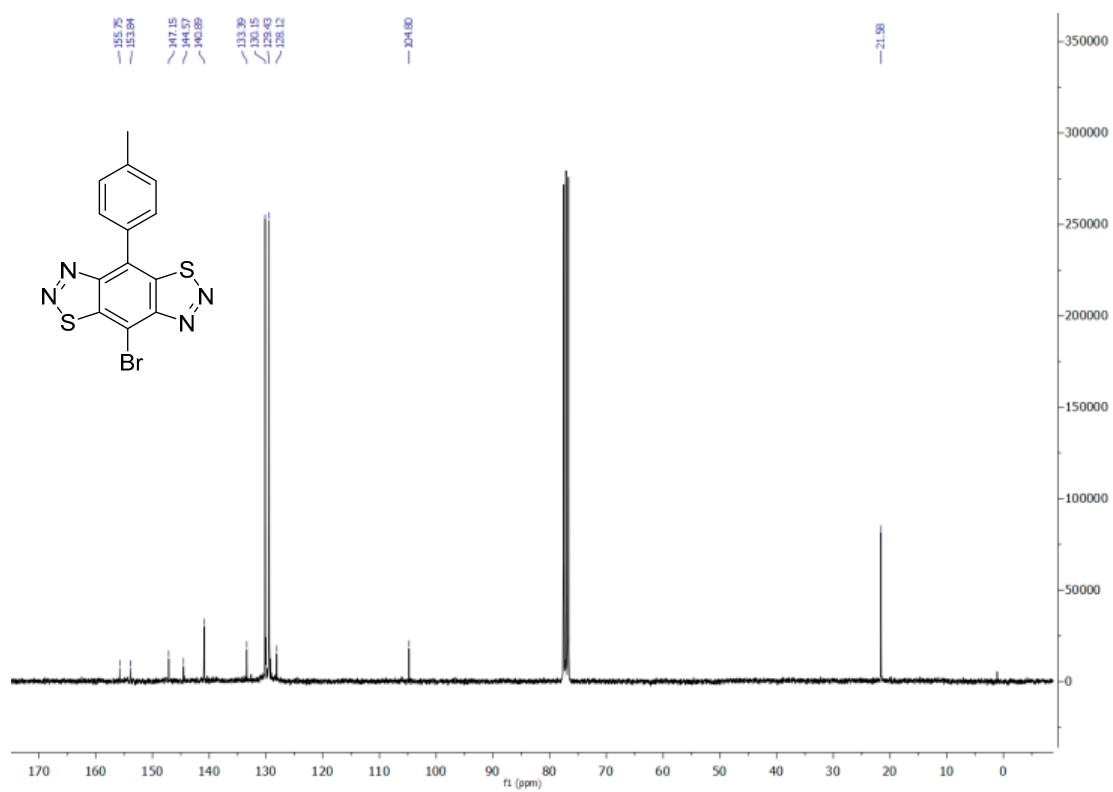

## Display Report

### Analysis Info

Analysis Name D:\Data\Kolotyrkina\2022\Chmovsh\0915007.d  
Method tune\_50-1600\_pos\_15\_12.m  
Sample Name /SUSU Tim-553  
Comment C13H7BrN4S2 mH 362.9368 calibrant added CH3CN

Acquisition Date 15.09.2022 13:26:12

Operator BDAL@DE  
Instrument / Ser# micrOTOF 10248

### Acquisition Parameter

|             |            |                      |          |                  |           |
|-------------|------------|----------------------|----------|------------------|-----------|
| Source Type | ESI        | Ion Polarity         | Positive | Set Nebulizer    | 0.4 Bar   |
| Focus       | Not active |                      |          | Set Dry Heater   | 180 °C    |
| Scan Begin  | 50 m/z     | Set Capillary        | 4500 V   | Set Dry Gas      | 4.0 l/min |
| Scan End    | 1600 m/z   | Set End Plate Offset | -500 V   | Set Divert Valve | Waste     |

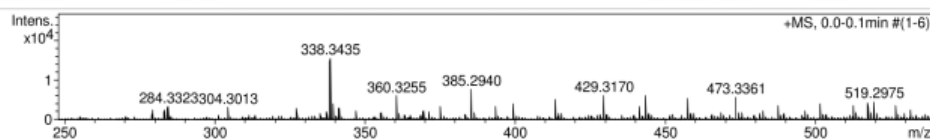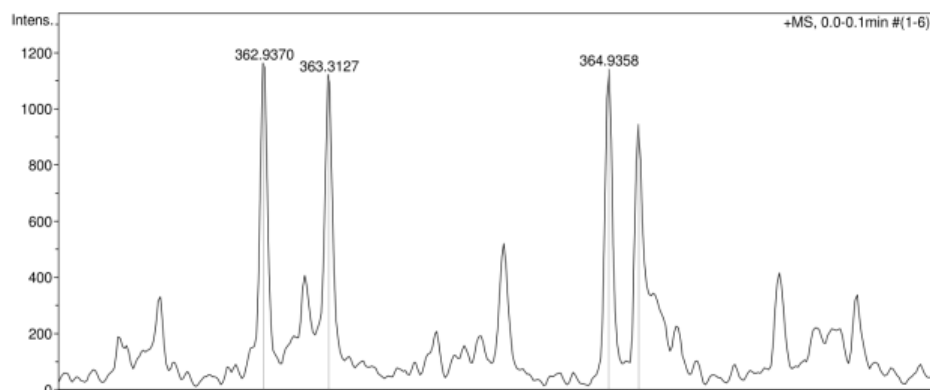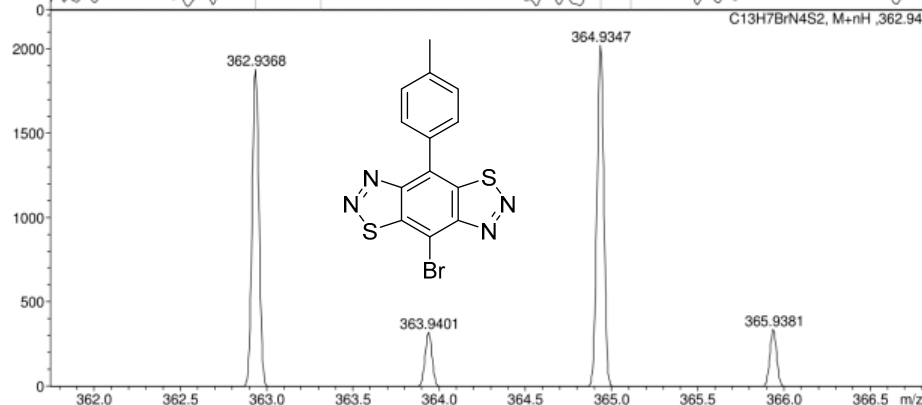

# 4-Bromo-8-(4-methoxyphenyl)benzo[1,2-d:4,5-d']bis([1,2,3]thiadiazole) (18g)

$^1\text{H}$  NMR (300 MHz)

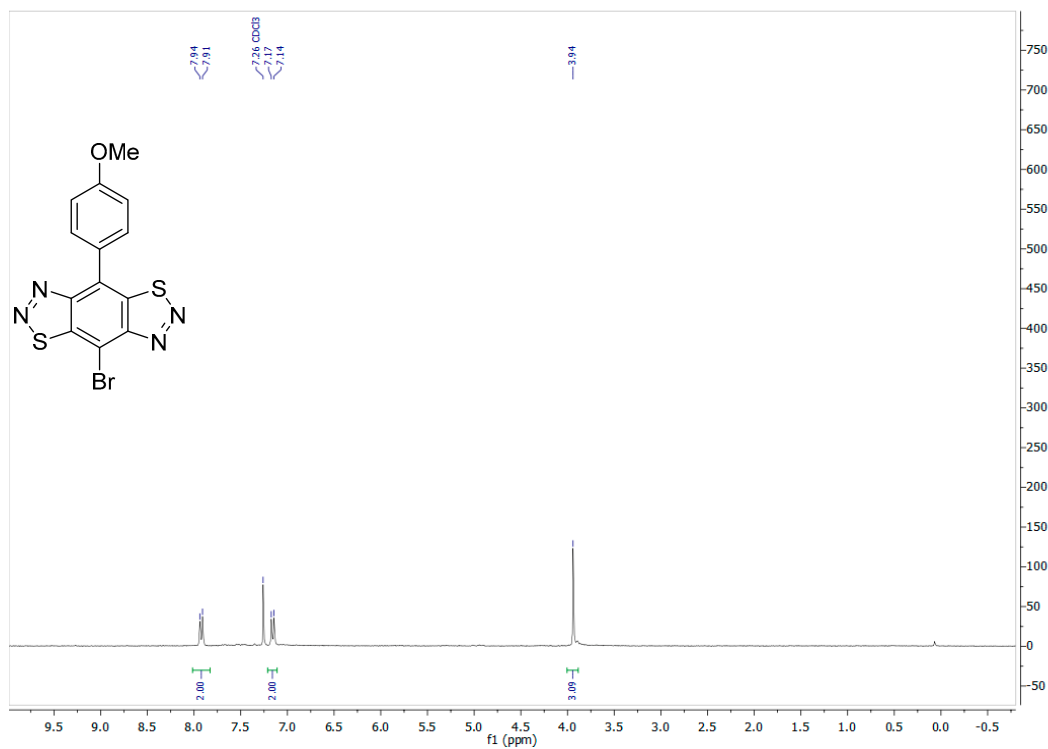

$^{13}\text{C}$  NMR (75 MHz)

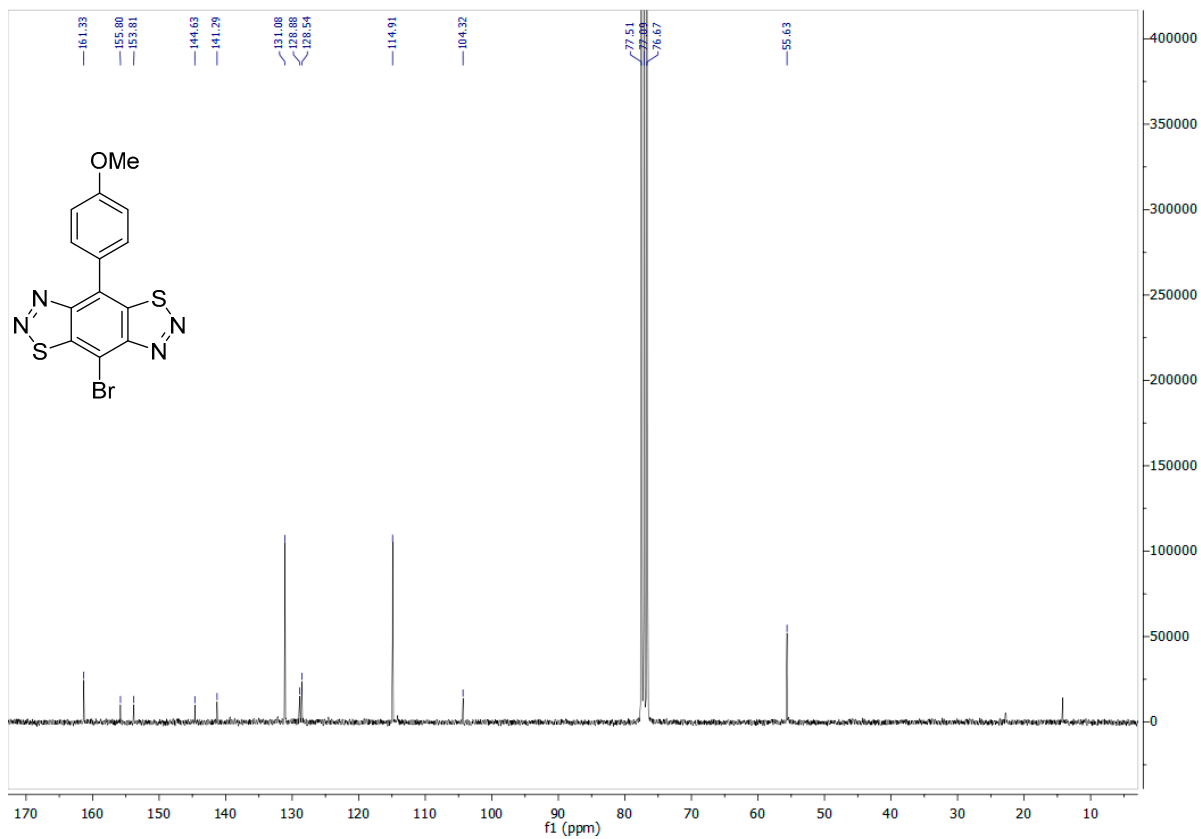

## Display Report

### Analysis Info

Analysis Name D:\Data\Kolotyrkina\2022\Chmovsh\1004026.d  
Method tune\_50-1600\_pos\_15\_12.m  
Sample Name /SUSU Tim-558  
Comment C13H7BrN4OS2 mH 378.9317 clb added CH3CN

Acquisition Date 04.10.2022 19:31:48

Operator BDAL@DE  
Instrument / Ser# micrOTOF 10248

### Acquisition Parameter

|             |            |                      |          |                  |           |
|-------------|------------|----------------------|----------|------------------|-----------|
| Source Type | ESI        | Ion Polarity         | Positive | Set Nebulizer    | 0.4 Bar   |
| Focus       | Not active |                      |          | Set Dry Heater   | 180 °C    |
| Scan Begin  | 50 m/z     | Set Capillary        | 4500 V   | Set Dry Gas      | 4.0 l/min |
| Scan End    | 1600 m/z   | Set End Plate Offset | -500 V   | Set Divert Valve | Waste     |

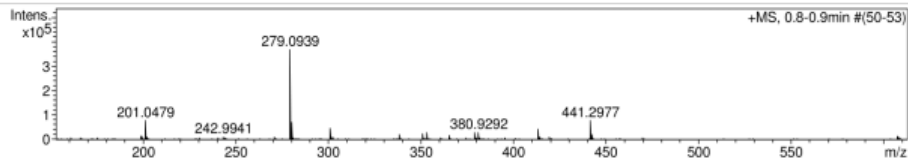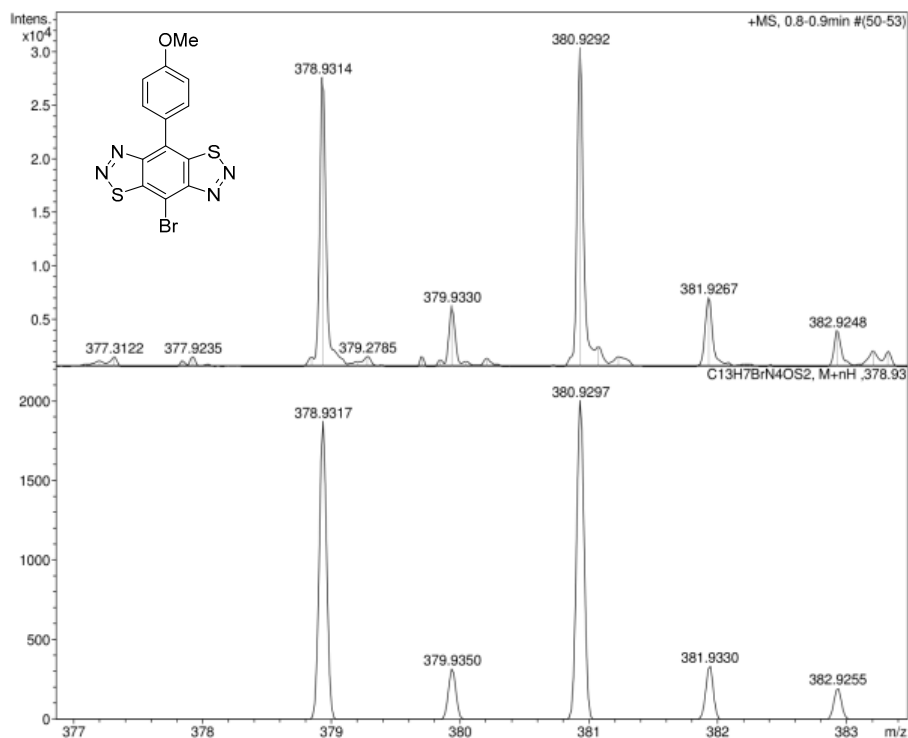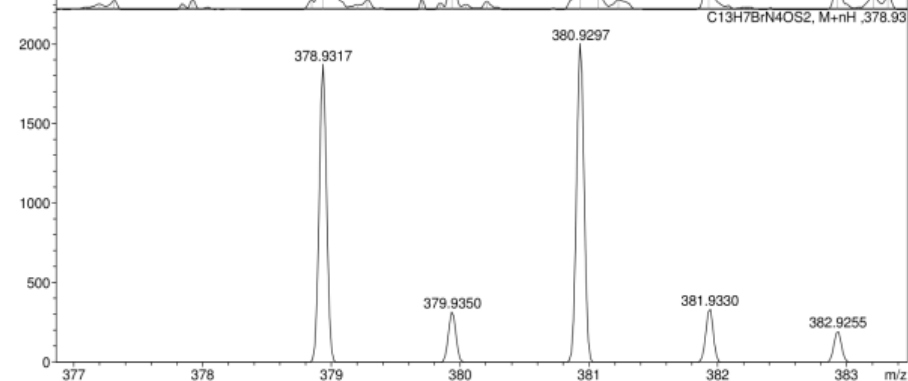

# 4-(8-Bromobenzo[1,2-d:4,5-d']bis([1,2,3]thiadiazole)-4-yl)-N,N-diphenylaniline (18h)

<sup>1</sup>H NMR (300 MHz)

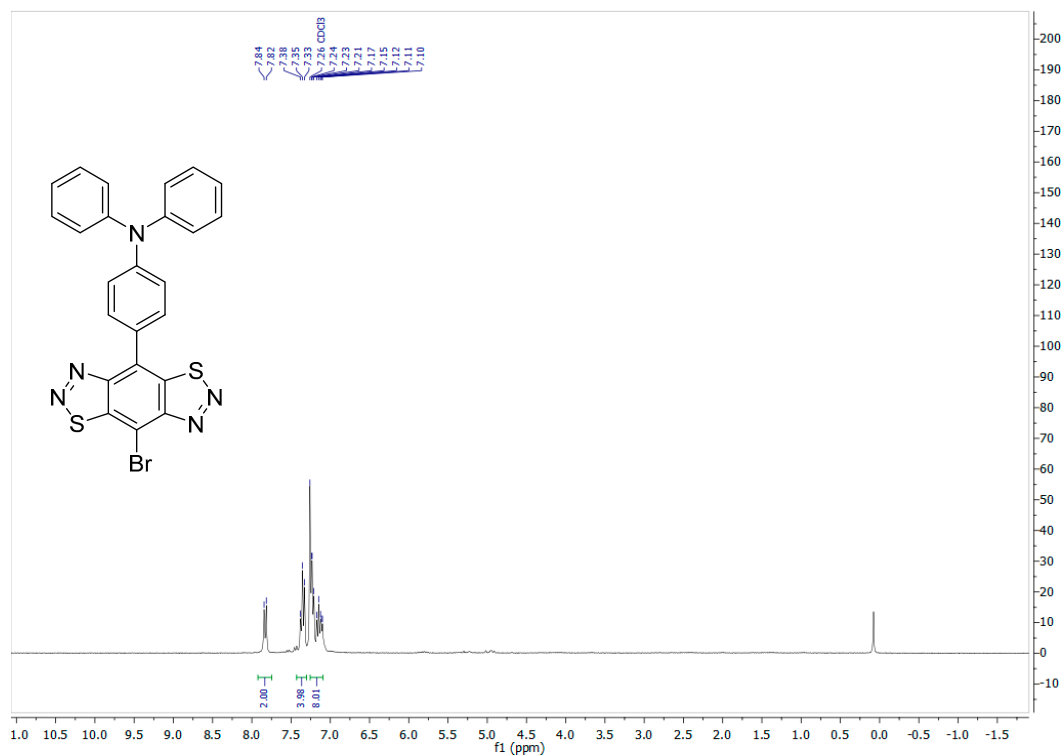

<sup>13</sup>C NMR (75 MHz)

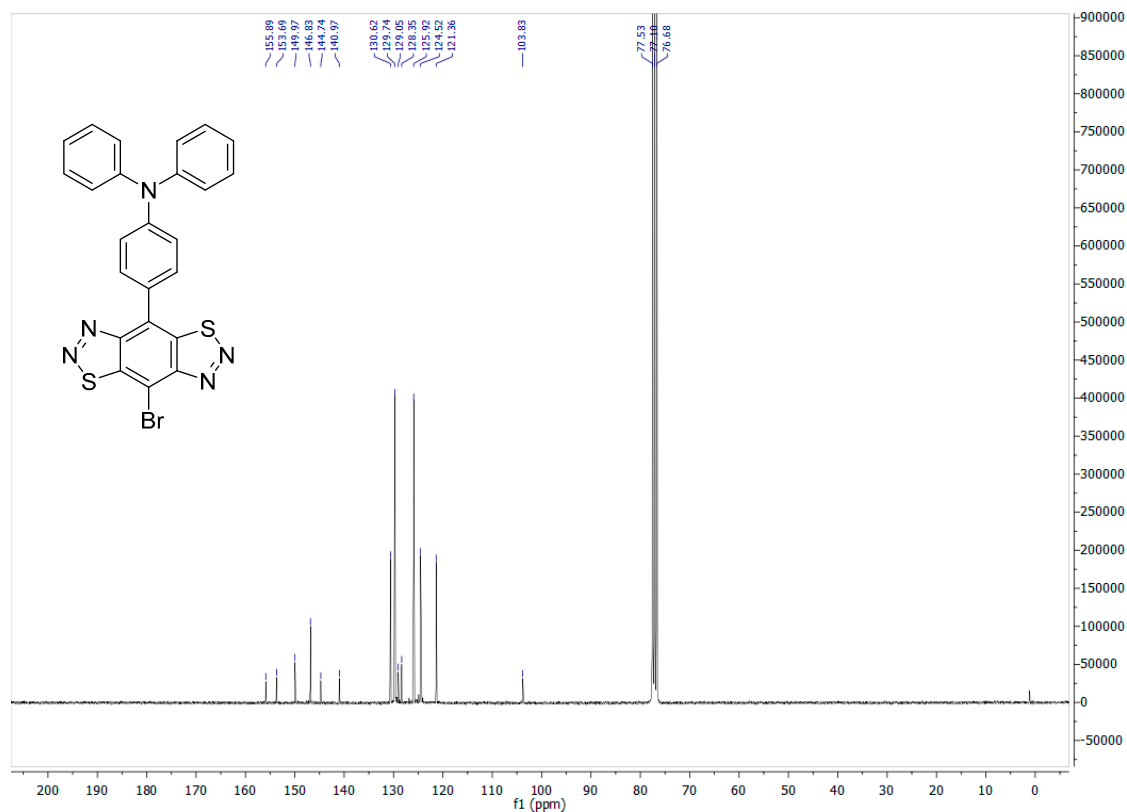

## Display Report

### Analysis Info

Analysis Name D:\Data\Kolotyorkina\2022\Chmovsh\0728022.d  
 Method tune\_wide.m  
 Sample Name /SUSU Tim-546  
 Comment C24H14BrN5S2 mH 515.9946 clb added CH3CN

Acquisition Date 28.07.2022 15:44:25

Operator BDAL@DE  
 Instrument / Ser# maXis 43

### Acquisition Parameter

|             |          |                      |          |                  |           |
|-------------|----------|----------------------|----------|------------------|-----------|
| Source Type | ESI      | Ion Polarity         | Positive | Set Nebulizer    | 0.5 Bar   |
| Focus       | Active   |                      |          | Set Dry Heater   | 180 °C    |
| Scan Begin  | 50 m/z   | Set Capillary        | 4500 V   | Set Dry Gas      | 4.0 l/min |
| Scan End    | 3000 m/z | Set End Plate Offset | -500 V   | Set Divert Valve | Waste     |

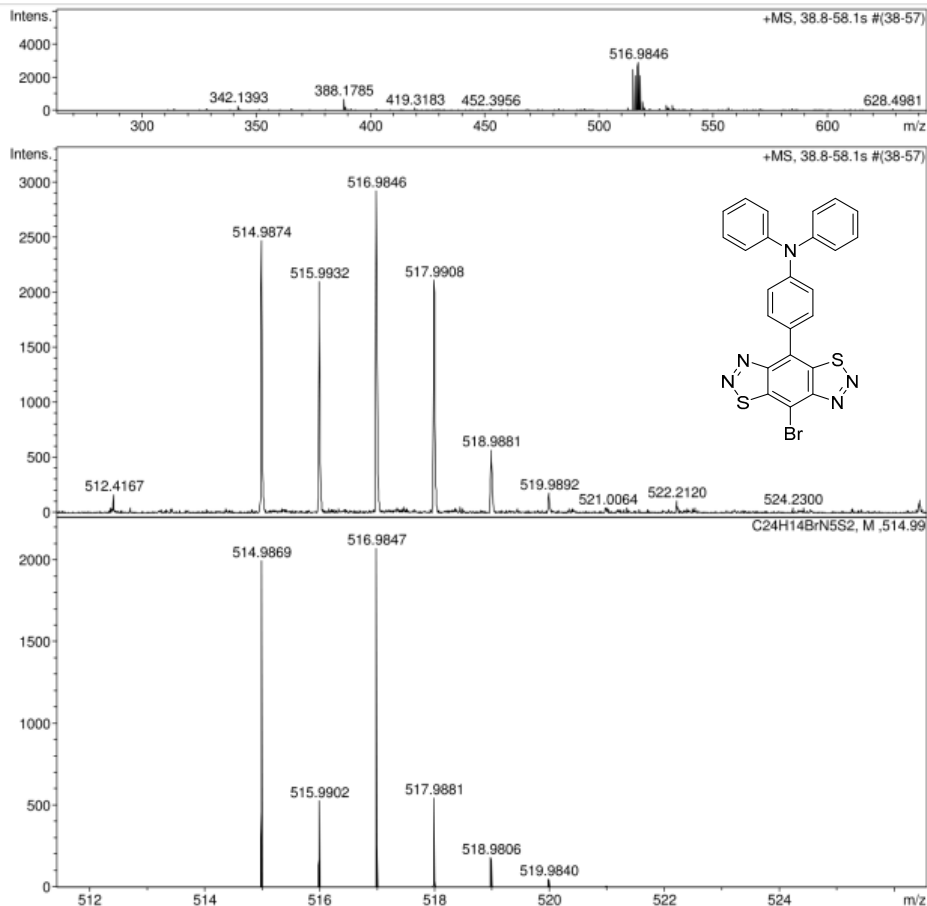

**4,8-Di(thiophen-2-yl)benzo[1,2-d:4,5-d']bis([1,2,3]thiadiazole) (19a)**

**$^1\text{H}$  NMR (300 MHz)**

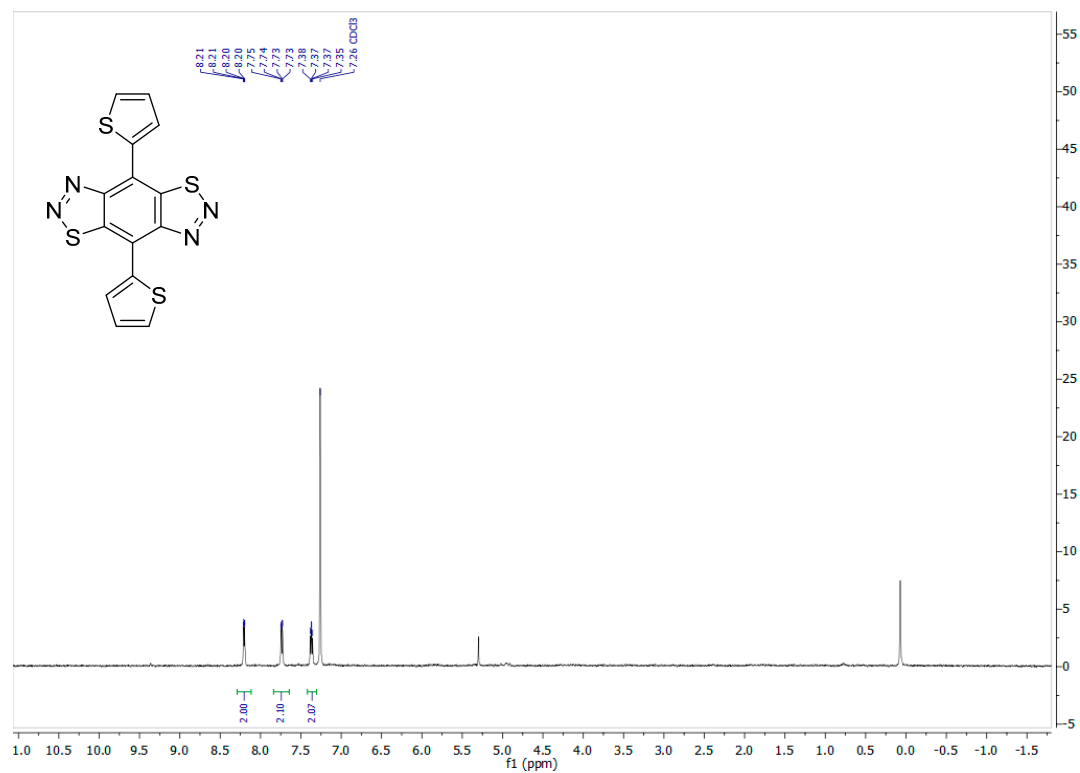

**$^{13}\text{C}$  NMR(75 MHz)**



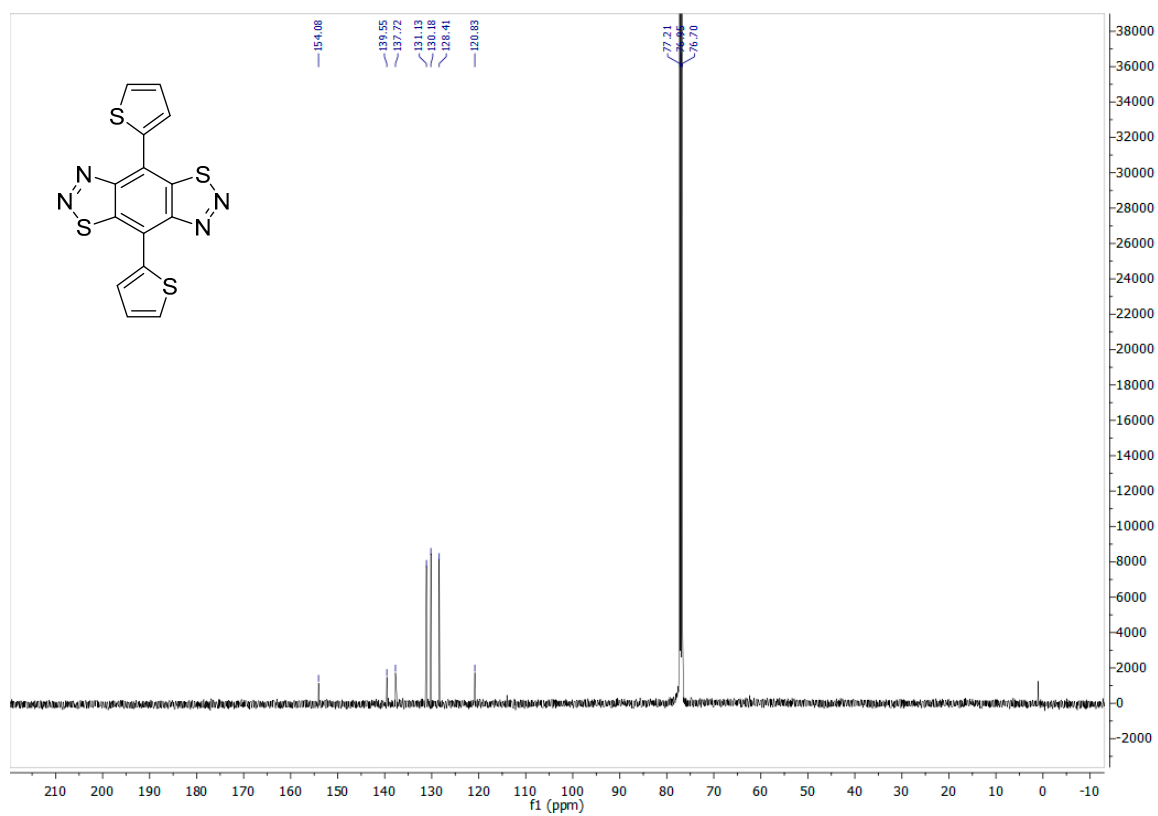

## Display Report

### Analysis Info

Analysis Name D:\Data\Kolotyrkina\2022\Chmovsh\0413003.d  
Method tune\_50-1600\_pos\_15\_12.m  
Sample Name /SUSU Tim-519  
Comment C14H6N4S4 mH 358.9548 clb added CH3CN

Acquisition Date 13.04.2022 10:32:53

Operator BDAL@DE  
Instrument / Ser# micrOTOF 10248

### Acquisition Parameter

|             |            |                      |          |                  |           |
|-------------|------------|----------------------|----------|------------------|-----------|
| Source Type | ESI        | Ion Polarity         | Positive | Set Nebulizer    | 0.4 Bar   |
| Focus       | Not active |                      |          | Set Dry Heater   | 180 °C    |
| Scan Begin  | 50 m/z     | Set Capillary        | 4500 V   | Set Dry Gas      | 4.0 l/min |
| Scan End    | 1600 m/z   | Set End Plate Offset | -500 V   | Set Divert Valve | Waste     |

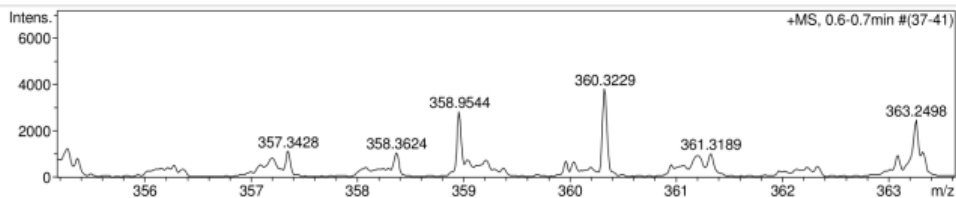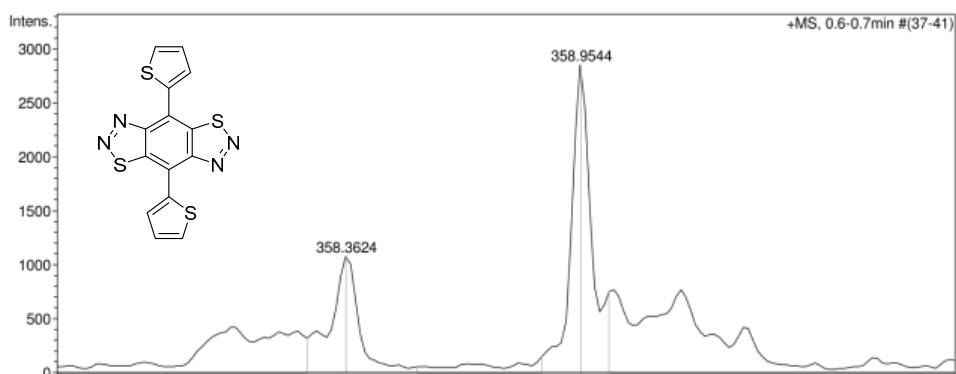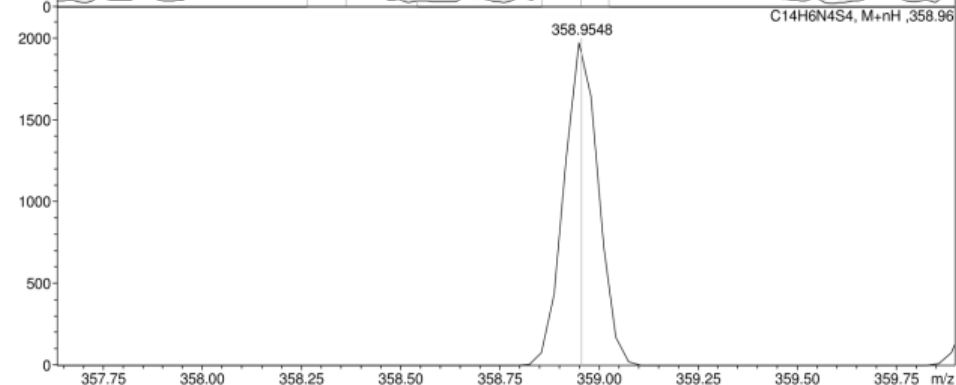

**4,8-Bis(4-hexylthiophen-2-yl)benzo[1,2-d:4,5-d']bis([1,2,3]thiadiazole) (19b)**

**<sup>1</sup>H NMR (300 MHz)**

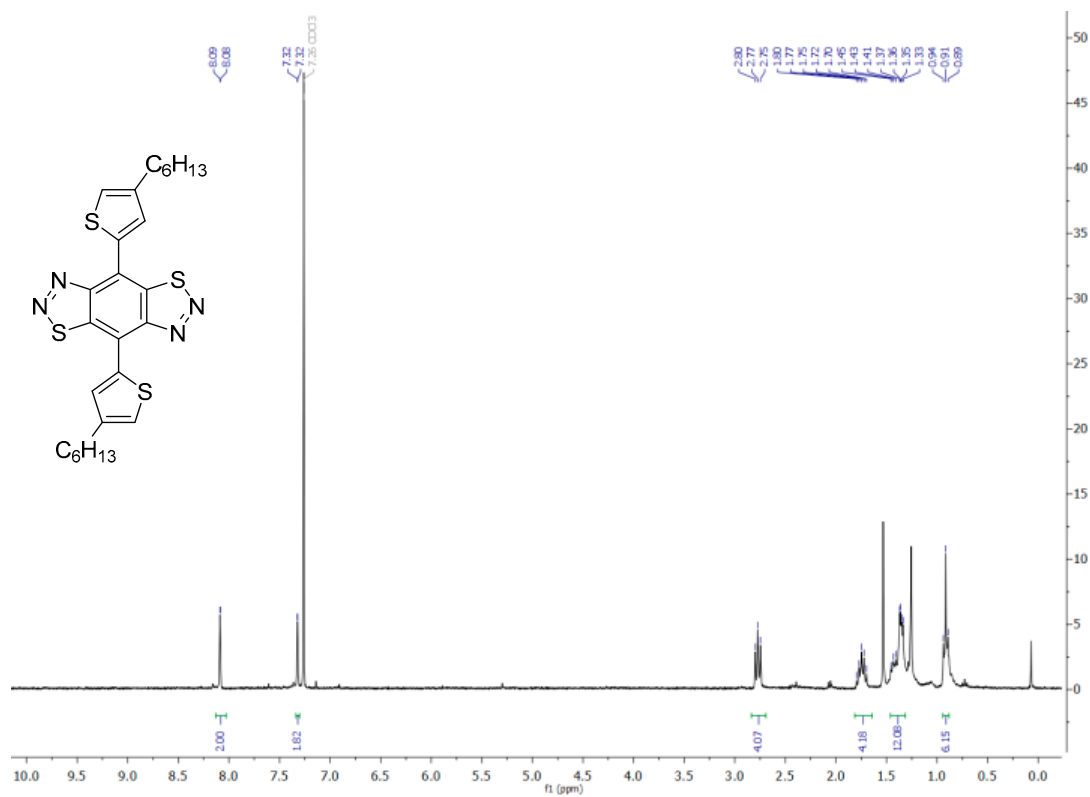

**<sup>13</sup>C NMR (75 MHz)**

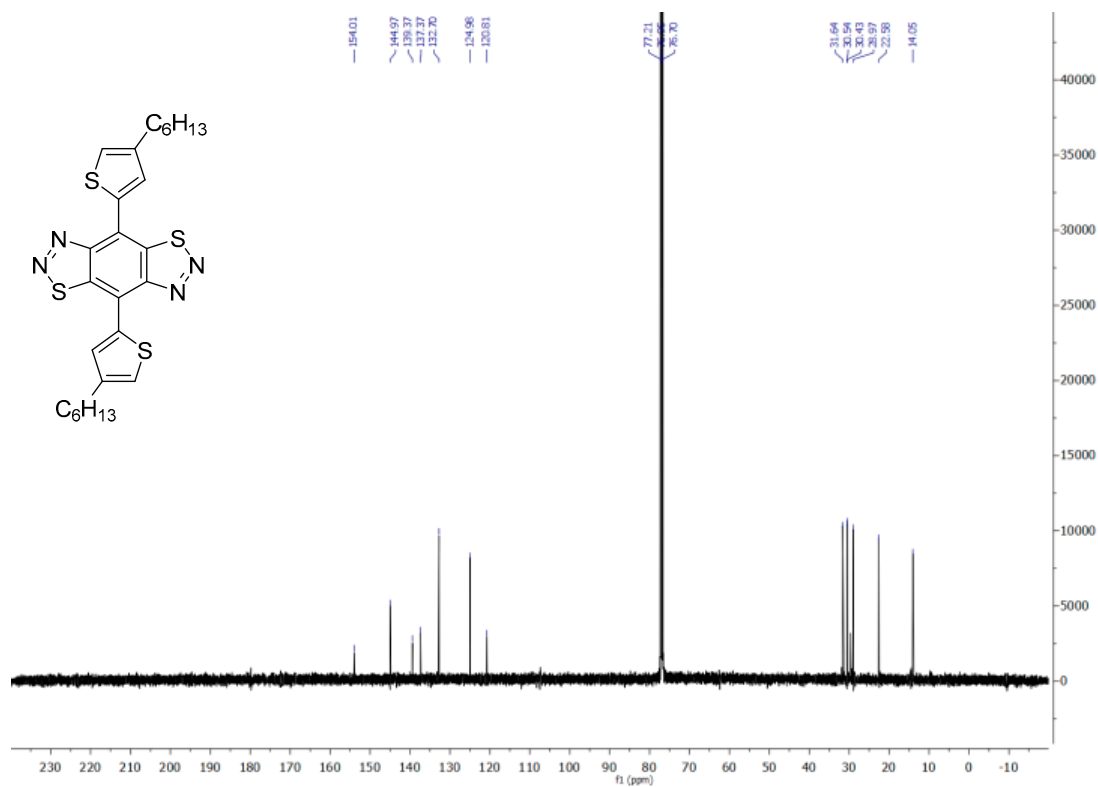

# Display Report

## Analysis Info

Analysis Name D:\Data\Kolotyrkina\2022\Chmovsh\0324040.d  
 Method tune\_50-1600\_pos\_15\_12.m  
 Sample Name /SUSU Tim-517  
 Comment C26H30N4S4 mH 527.1426 calibrant added CN3CN

Acquisition Date 24.03.2022 19:08:23

Operator BDAL@DE  
 Instrument / Ser# microTOF 10248

## Acquisition Parameter

|             |            |                      |          |                  |           |
|-------------|------------|----------------------|----------|------------------|-----------|
| Source Type | ESI        | Ion Polarity         | Positive | Set Nebulizer    | 0.4 Bar   |
| Focus       | Not active |                      |          | Set Dry Heater   | 180 °C    |
| Scan Begin  | 50 m/z     | Set Capillary        | 4500 V   | Set Dry Gas      | 4.0 l/min |
| Scan End    | 1600 m/z   | Set End Plate Offset | -500 V   | Set Divert Valve | Waste     |

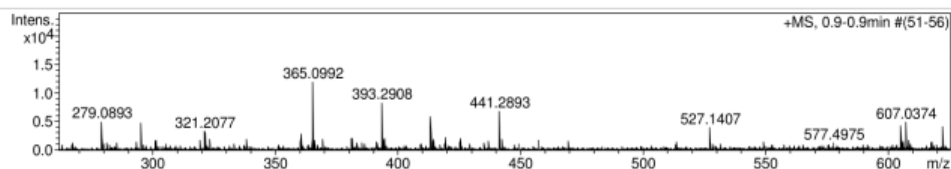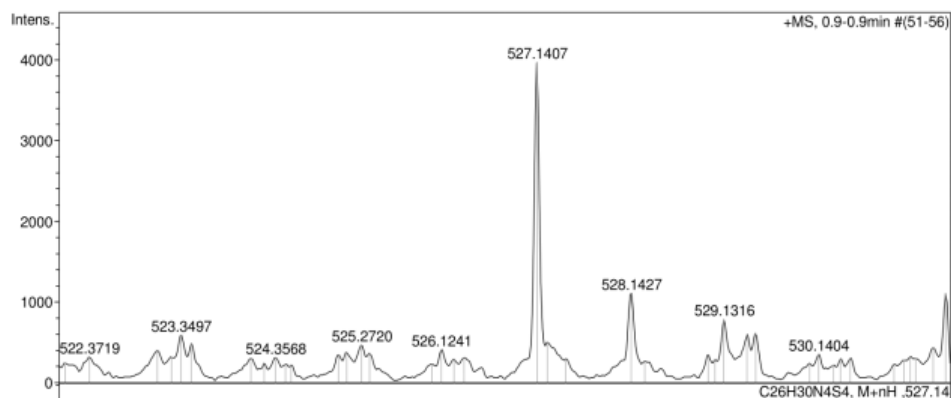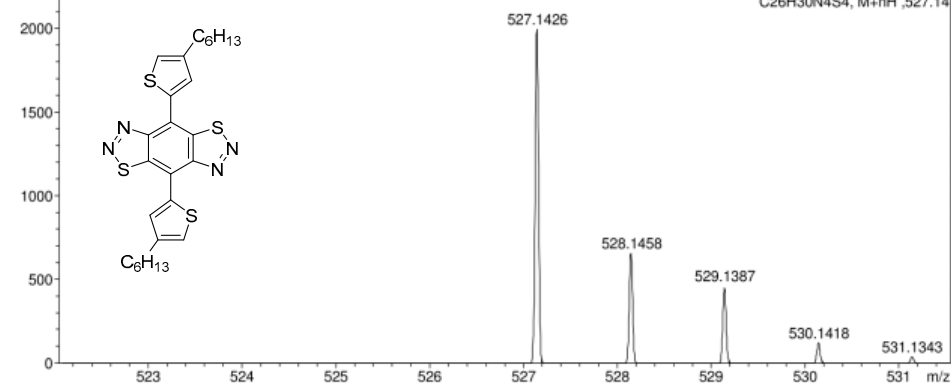

# 4,8-Di([2,2'-bithiophen]-5-yl)benzo[1,2-d:4,5-d']bis([1,2,3]thiadiazole) (19c)

<sup>1</sup>H NMR (300 MHz)

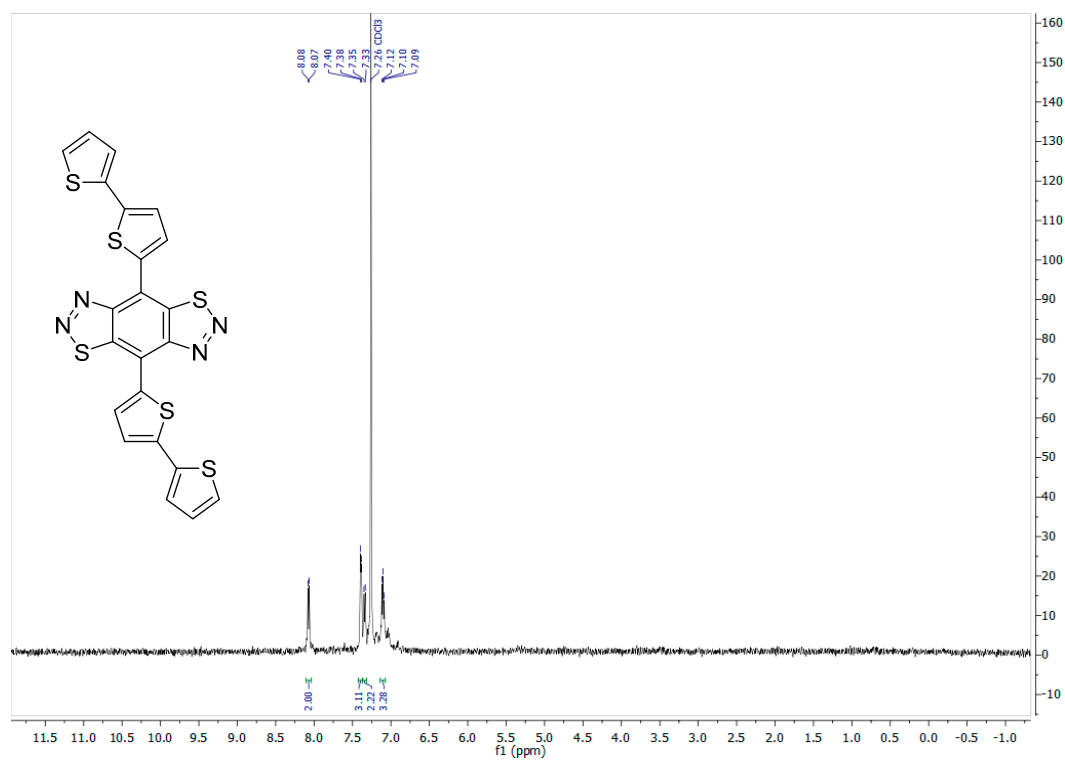

<sup>13</sup>C NMR (75 MHz)

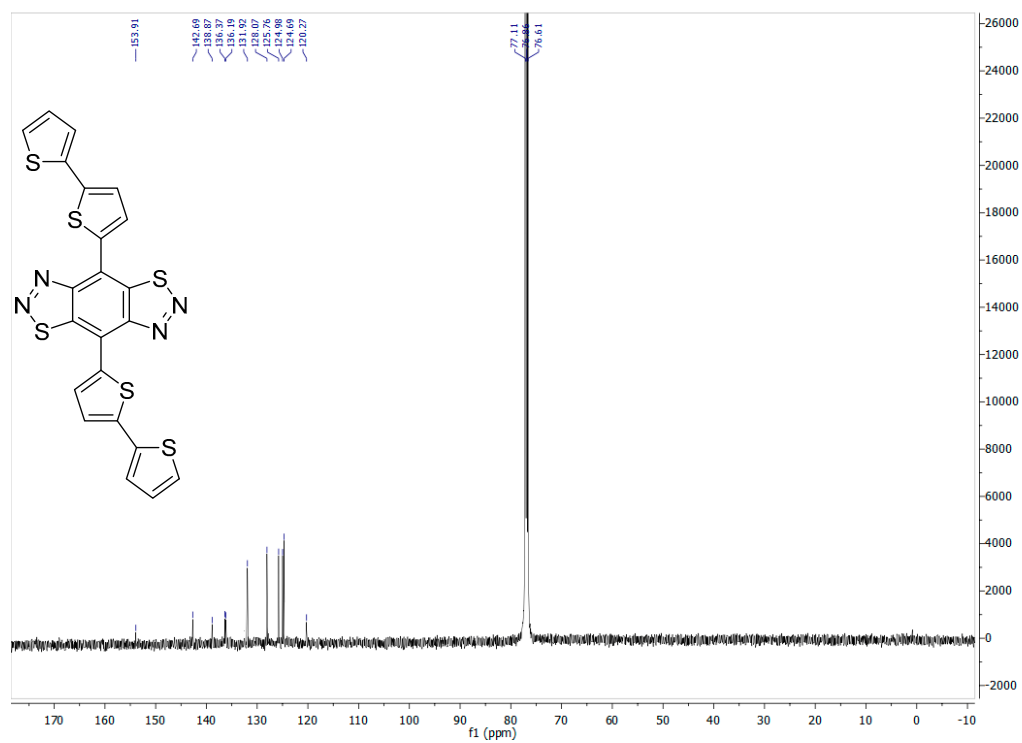

## Display Report

### Analysis Info

Analysis Name D:\Data\Kolotyrkina\2022\Chmovsh\0920003.d  
Method tune\_50-1600\_pos\_15\_12.m  
Sample Name /SUSU Tim-555  
Comment C22H10N4S6 mH 522.9302 calibrant added CH3CN

Acquisition Date 20.09.2022 11:35:18  
Operator BDAL@DE  
Instrument / Ser# micrOTOF 10248

### Acquisition Parameter

|             |            |                      |          |                  |           |
|-------------|------------|----------------------|----------|------------------|-----------|
| Source Type | ESI        | Ion Polarity         | Positive | Set Nebulizer    | 0.4 Bar   |
| Focus       | Not active |                      |          | Set Dry Heater   | 180 °C    |
| Scan Begin  | 50 m/z     | Set Capillary        | 4500 V   | Set Dry Gas      | 4.0 l/min |
| Scan End    | 1600 m/z   | Set End Plate Offset | -500 V   | Set Divert Valve | Waste     |

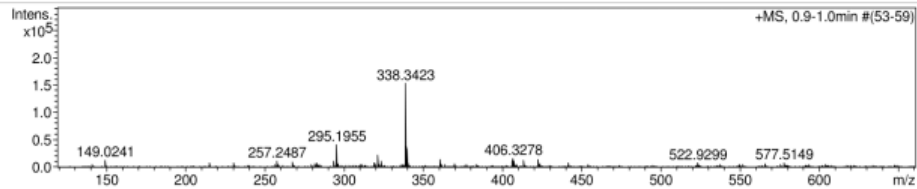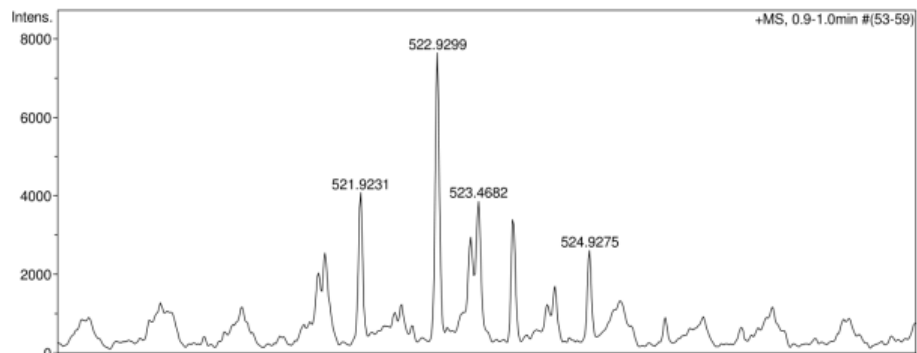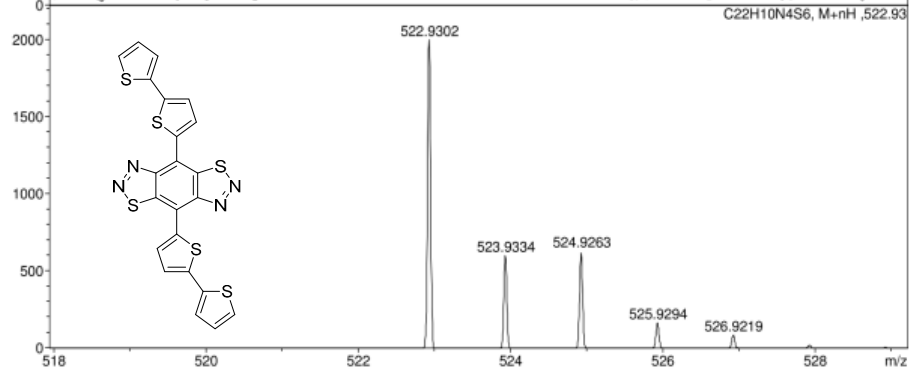

4,8-Bis(5-(2-ethylhexyl)thiophen-2-yl)benzo[1,2-d:4,5-d']bis([1,2,3]thiadiazole) (19d)

$^1\text{H}$  NMR (300 MHz)

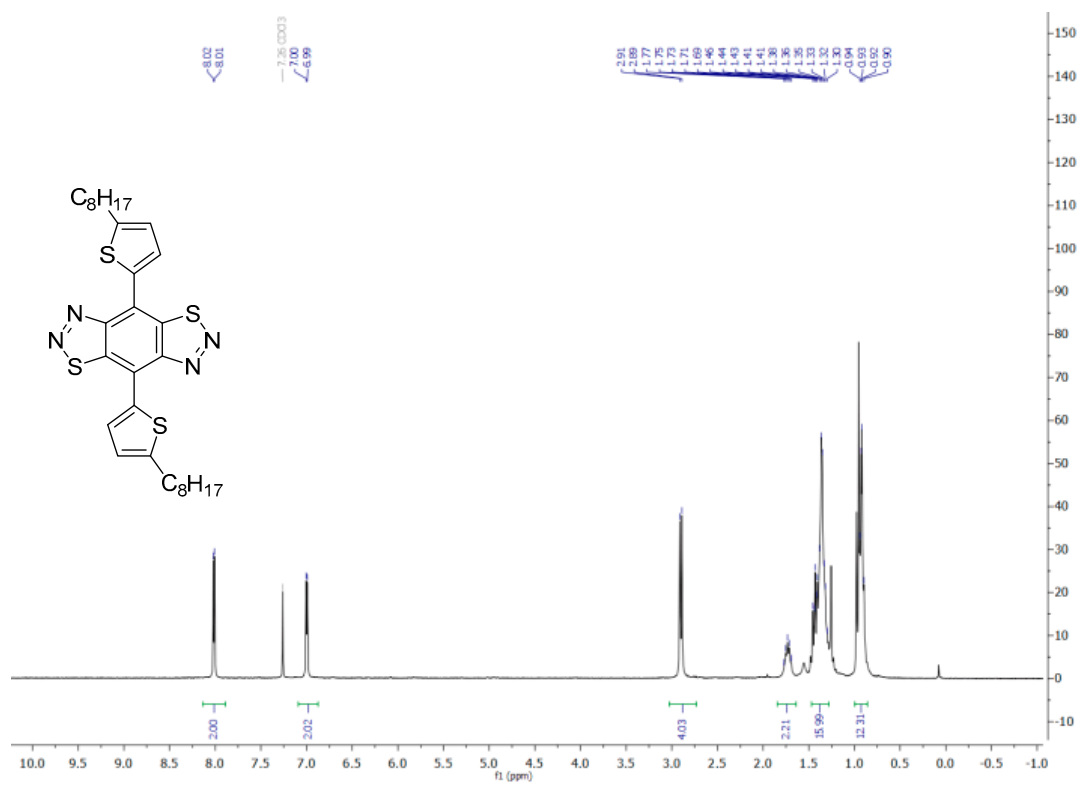

$^{13}\text{C}$  NMR (75 MHz)

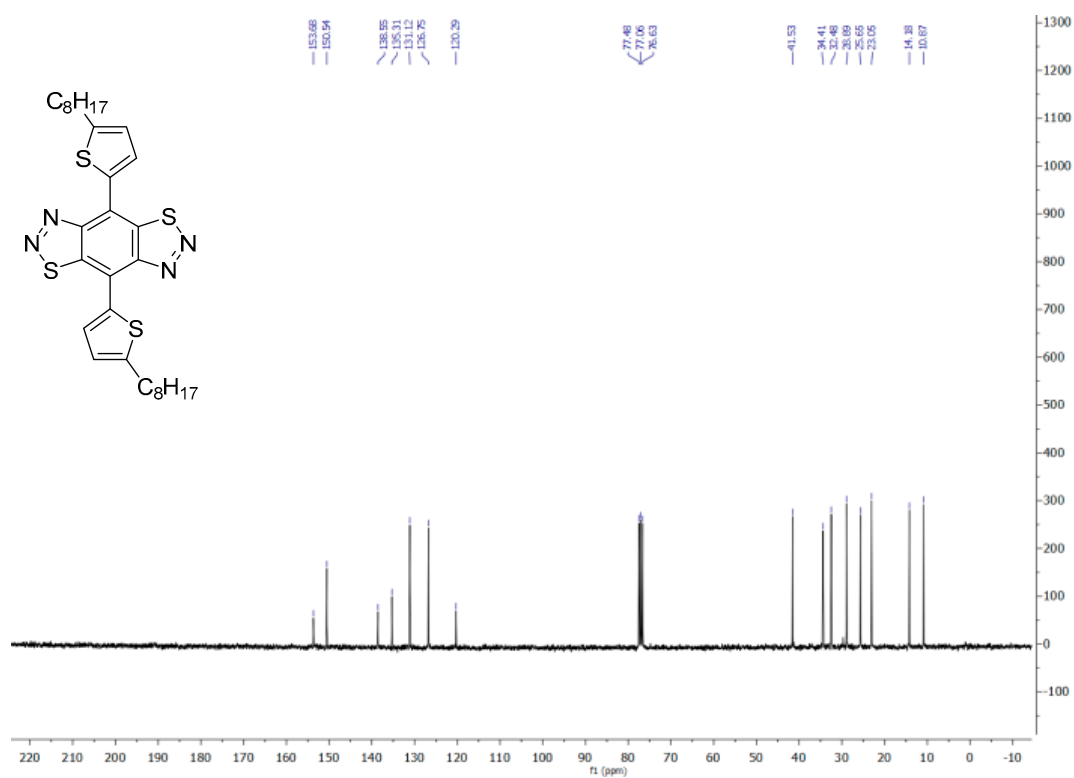



# Display Report

## Analysis Info

Analysis Name D:\Data\Chizhov\Rakitin\Chmovzh\tim-507\_&clb.d  
 Method tune\_wide.m  
 Sample Name /SUSU Tim-507  
 Comment CH3CN 100 %, dil. 200, calibrant added

Acquisition Date 01.02.2022 16:28:52

Operator BDAL@DE  
 Instrument / Ser# micrOTOF 10248

## Acquisition Parameter

|             |            |                      |          |                  |           |
|-------------|------------|----------------------|----------|------------------|-----------|
| Source Type | ESI        | Ion Polarity         | Positive | Set Nebulizer    | 0.4 Bar   |
| Focus       | Not active |                      |          | Set Dry Heater   | 180 °C    |
| Scan Begin  | 50 m/z     | Set Capillary        | 4500 V   | Set Dry Gas      | 4.0 l/min |
| Scan End    | 3000 m/z   | Set End Plate Offset | -500 V   | Set Divert Valve | Waste     |

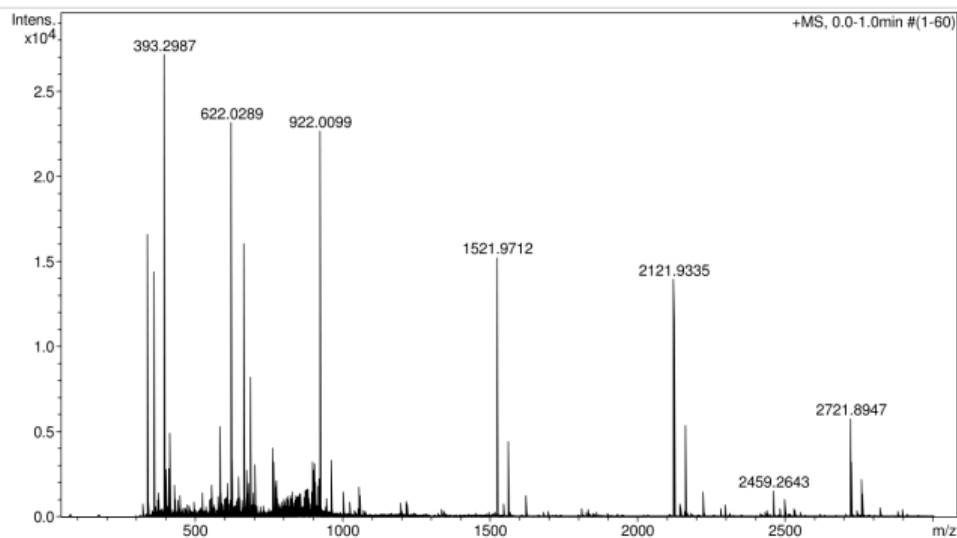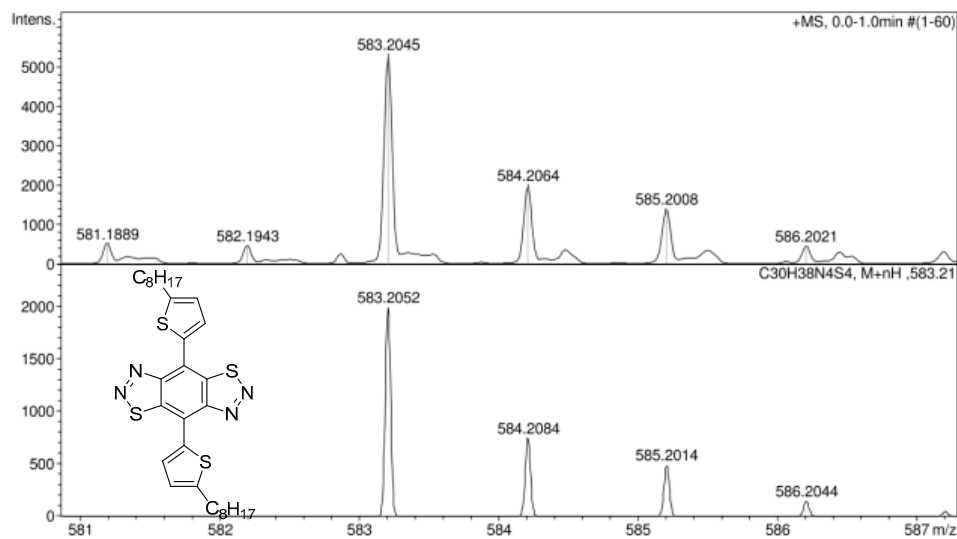

# 4,8-Diphenylbenzo[1,2-d:4,5-d']bis([1,2,3]thiadiazole) (19e)

<sup>1</sup>H NMR (300 MHz)

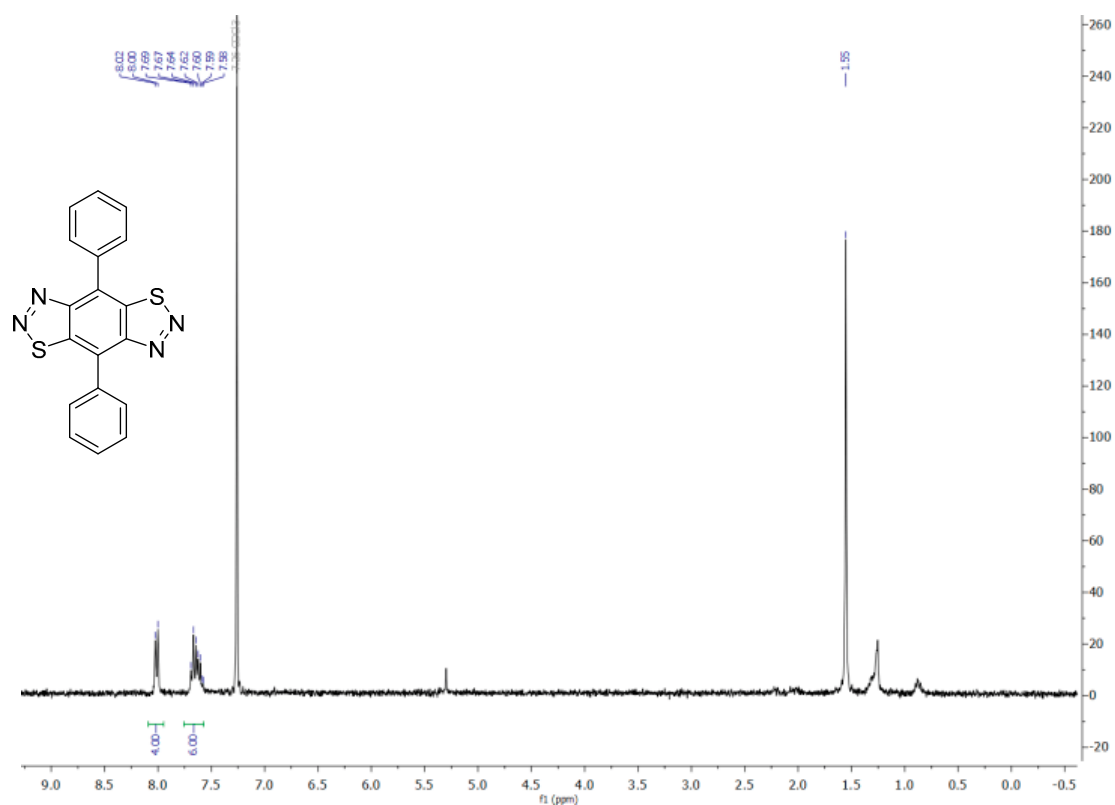

<sup>13</sup>C NMR(75 MHz)

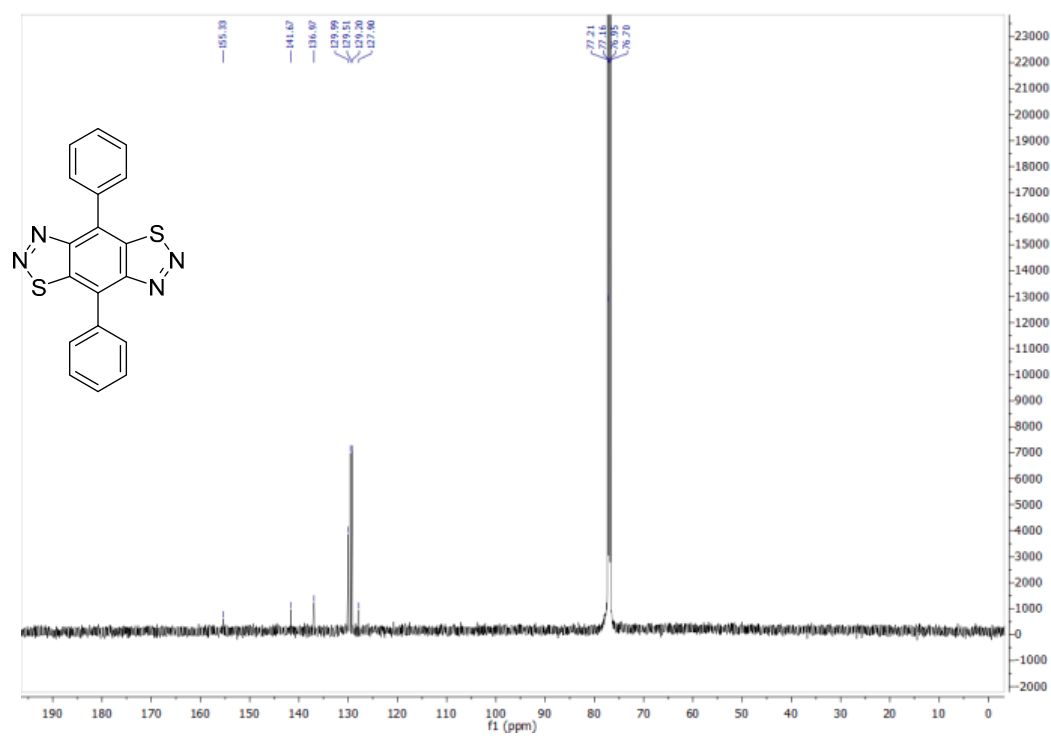

# Display Report

## Analysis Info

Analysis Name D:\Data\Kolotyrkina\2022\Chmovsh\0608028.d  
 Method tune\_50-1600\_pos\_15\_12.m  
 Sample Name /SUSU Tim-533  
 Comment C18H10N4S2 mH 347.0419 clb added CH3CN

Acquisition Date 08.06.2022 16:45:25

Operator BDAL@DE  
 Instrument / Ser# micrOTOF 10248

## Acquisition Parameter

|             |            |                      |          |                  |           |
|-------------|------------|----------------------|----------|------------------|-----------|
| Source Type | ESI        | Ion Polarity         | Positive | Set Nebulizer    | 0.4 Bar   |
| Focus       | Not active |                      |          | Set Dry Heater   | 180 °C    |
| Scan Begin  | 50 m/z     | Set Capillary        | 4500 V   | Set Dry Gas      | 4.0 l/min |
| Scan End    | 1600 m/z   | Set End Plate Offset | -500 V   | Set Divert Valve | Waste     |

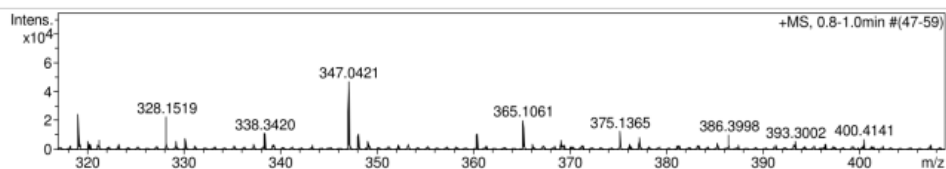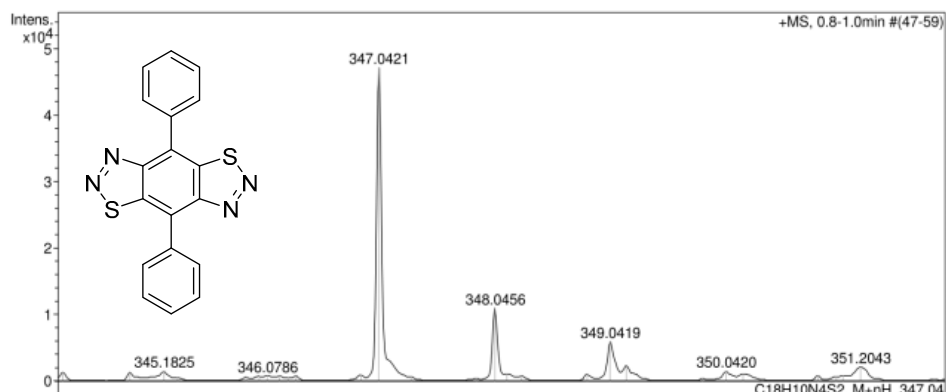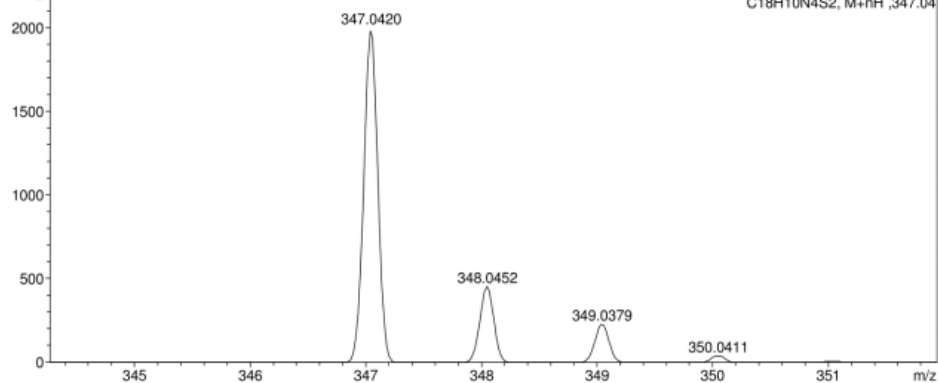

**4,8-Di-p-tolylbenzo[1,2-d:4,5-d']bis([1,2,3]thiadiazole) (19f)**

**$^1\text{H}$  NMR (300 MHz)**

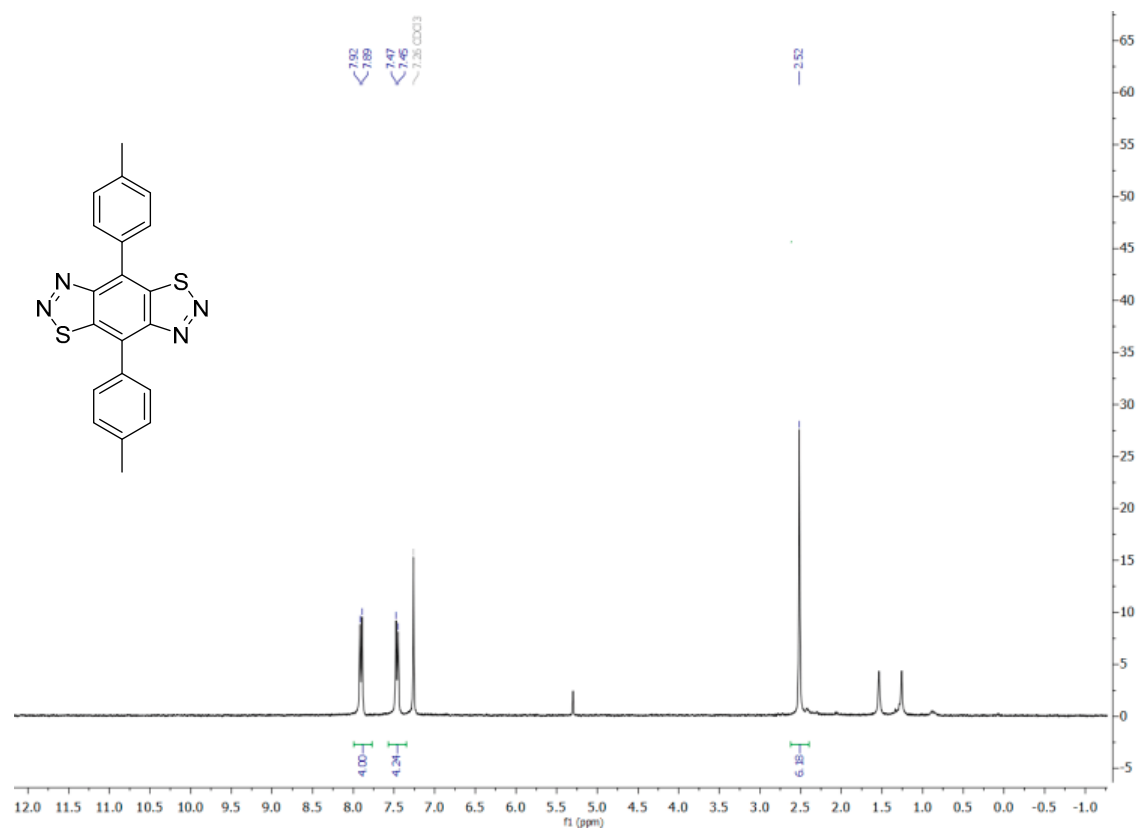

**$^{13}\text{C}$  NMR (75 MHz)**

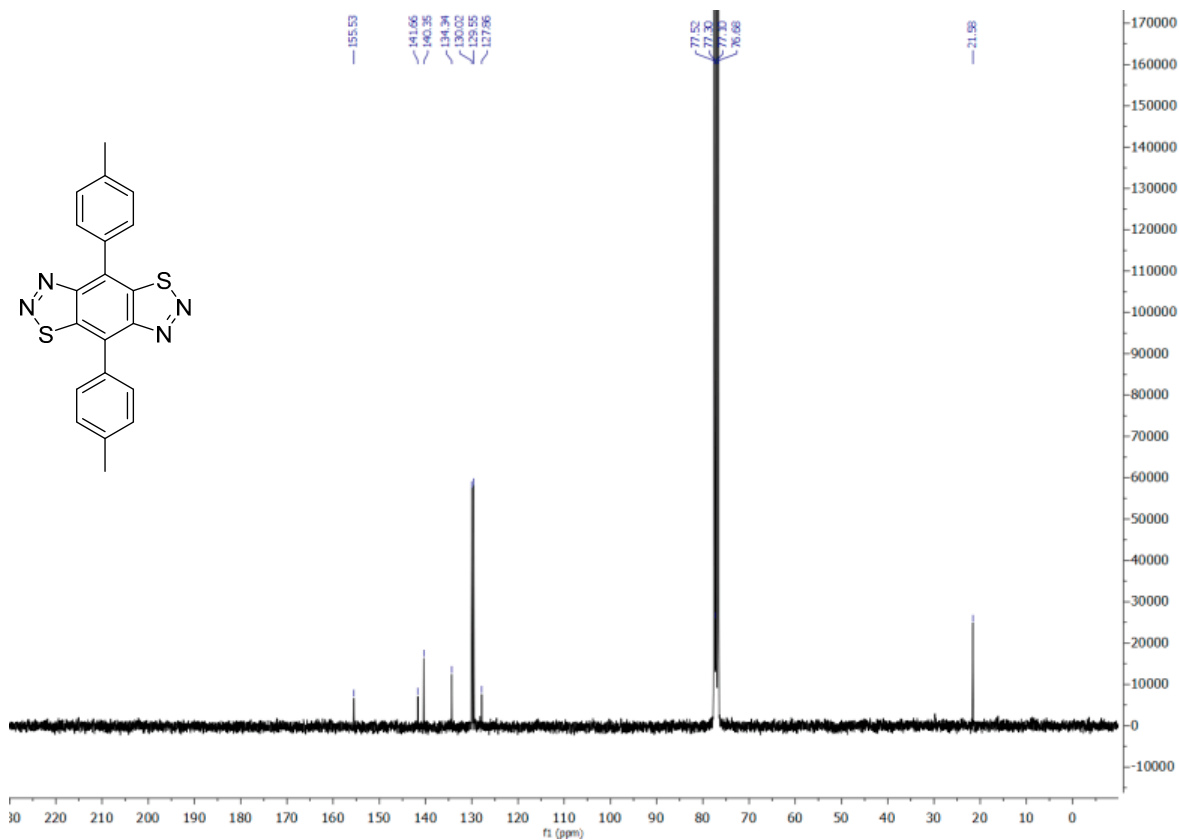

## Display Report

|                      |                                              |                   |                     |
|----------------------|----------------------------------------------|-------------------|---------------------|
| <b>Analysis Info</b> |                                              | Acquisition Date  | 30.03.2022 10:00:29 |
| Analysis Name        | D:\Data\Kolotyarkina\2022\Chmovsh\0330001.d  | Operator          | BDAL@DE             |
| Method               | tune_50-1600_pos_15_12.m                     | Instrument / Ser# | micrOTOF 10248      |
| Sample Name          | /SUSU Tim-518                                |                   |                     |
| Comment              | C20H14N4S2 mH 375.0732 calibrant added CH3CN |                   |                     |

|                              |            |                      |          |                  |           |
|------------------------------|------------|----------------------|----------|------------------|-----------|
| <b>Acquisition Parameter</b> |            |                      |          |                  |           |
| Source Type                  | ESI        | Ion Polarity         | Positive | Set Nebulizer    | 0.4 Bar   |
| Focus                        | Not active |                      |          | Set Dry Heater   | 180 °C    |
| Scan Begin                   | 50 m/z     | Set Capillary        | 4500 V   | Set Dry Gas      | 4.0 l/min |
| Scan End                     | 1600 m/z   | Set End Plate Offset | -500 V   | Set Divert Valve | Waste     |

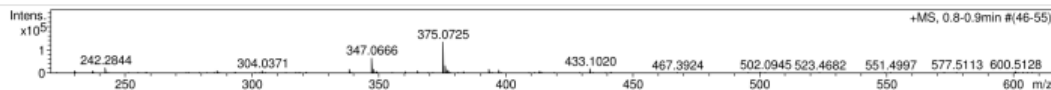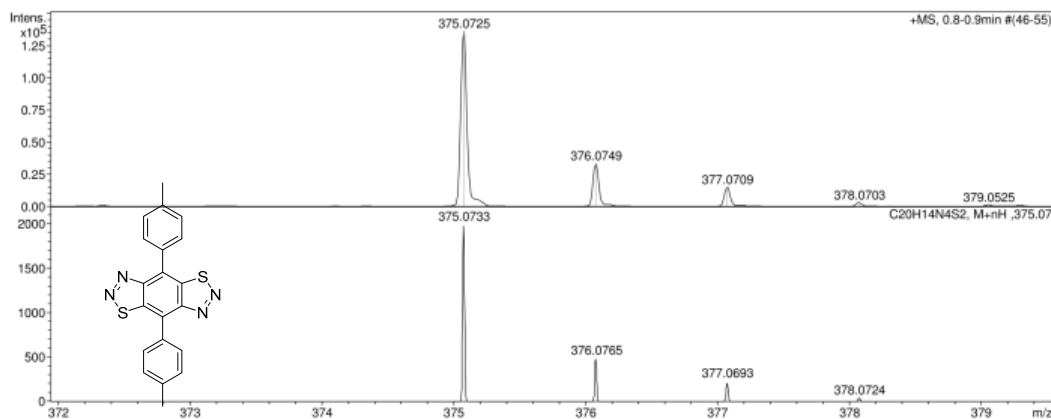

**4,8-Bis(4-methoxyphenyl)benzo[1,2-d:4,5-d']bis([1,2,3]thiadiazole) (19g)**

**<sup>1</sup>H NMR (300 MHz)**

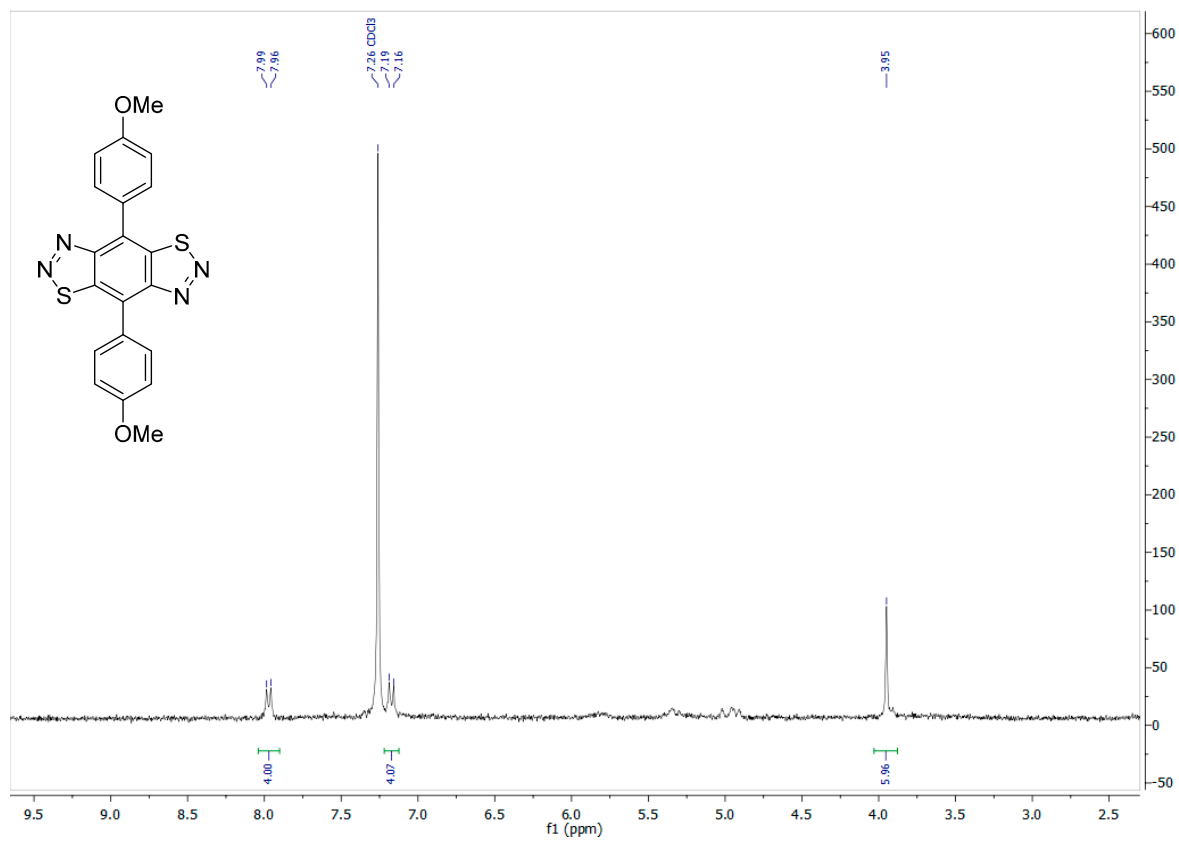

# Display Report

## Analysis Info

Analysis Name D:\Data\Chizhov\Rakitin\Chmovzh\tim-534\_&clb.d  
 Method tune\_wide.m  
 Sample Name /SUSU Tim-534  
 Comment CH3CN 100 %, dil. 20, calibrant added

Acquisition Date 28.06.2022 17:07:17

Operator BDAL@DE  
 Instrument / Ser# microTOF 10248

## Acquisition Parameter

|             |            |                      |          |                  |           |
|-------------|------------|----------------------|----------|------------------|-----------|
| Source Type | ESI        | Ion Polarity         | Positive | Set Nebulizer    | 0.4 Bar   |
| Focus       | Not active |                      |          | Set Dry Heater   | 180 °C    |
| Scan Begin  | 50 m/z     | Set Capillary        | 4500 V   | Set Dry Gas      | 4.0 l/min |
| Scan End    | 3000 m/z   | Set End Plate Offset | -500 V   | Set Divert Valve | Waste     |

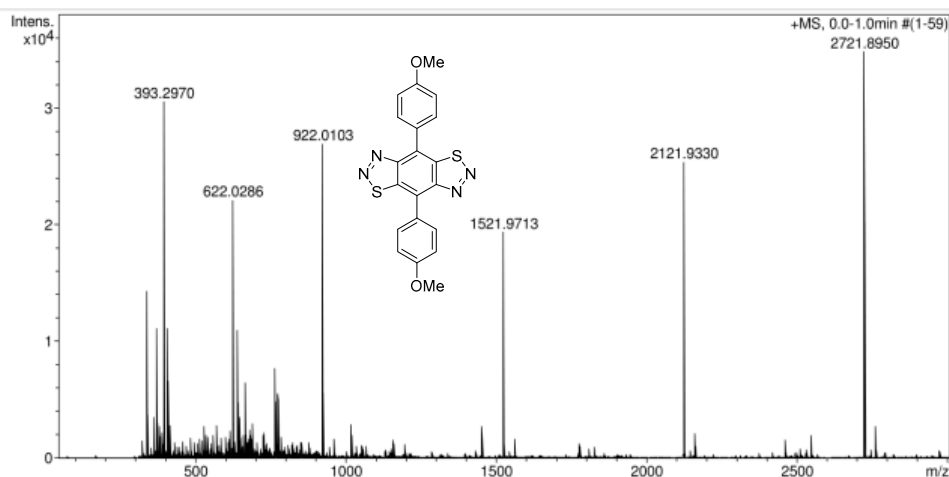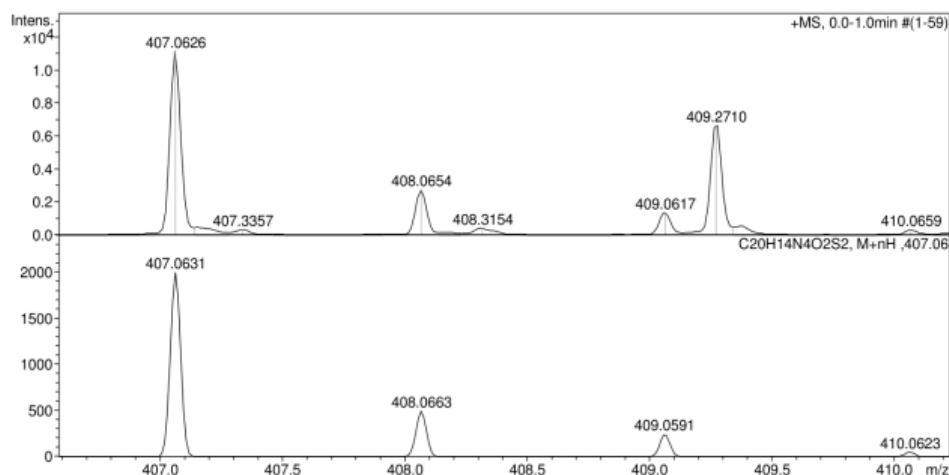

**4,4'-(Benzo[1,2-d:4,5-d']bis([1,2,3]thiadiazole)-4,8-diyl)bis(N,N-diphenylaniline) (19h)**

**<sup>1</sup>H NMR (300 MHz)**

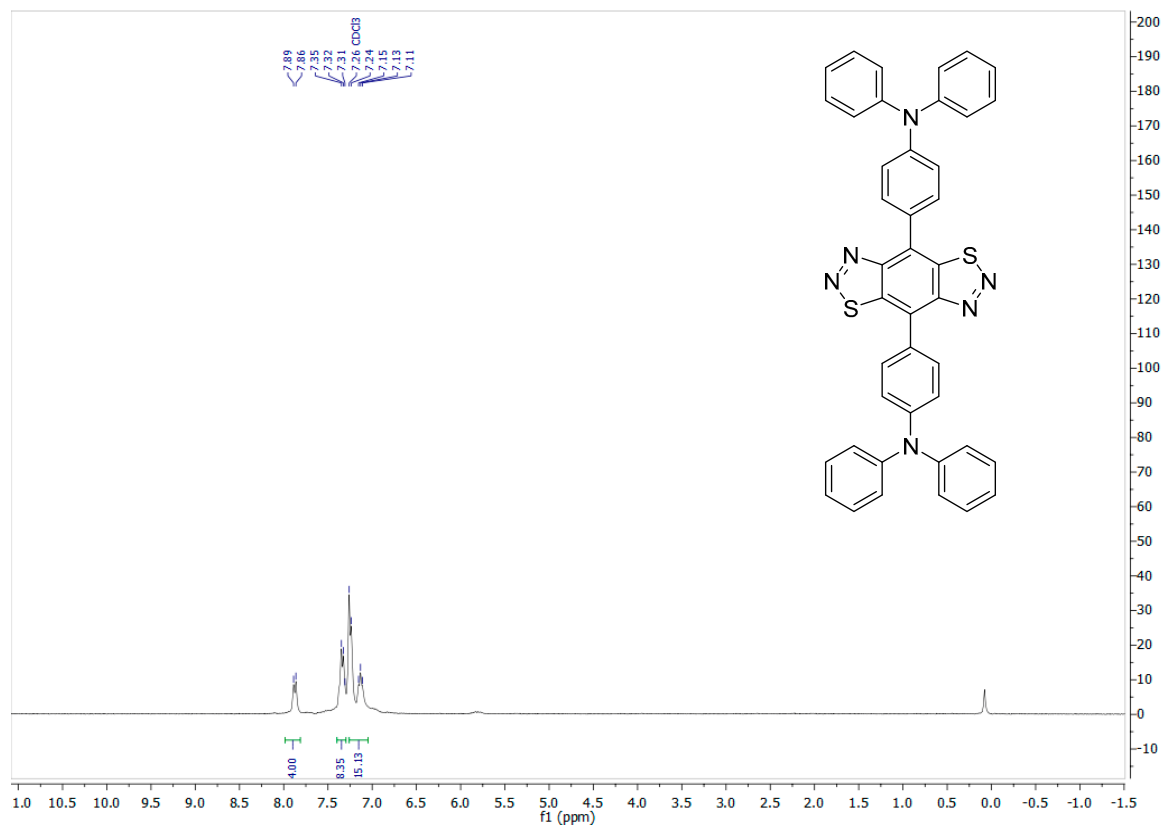

**<sup>13</sup>C NMR(75 MHz)**



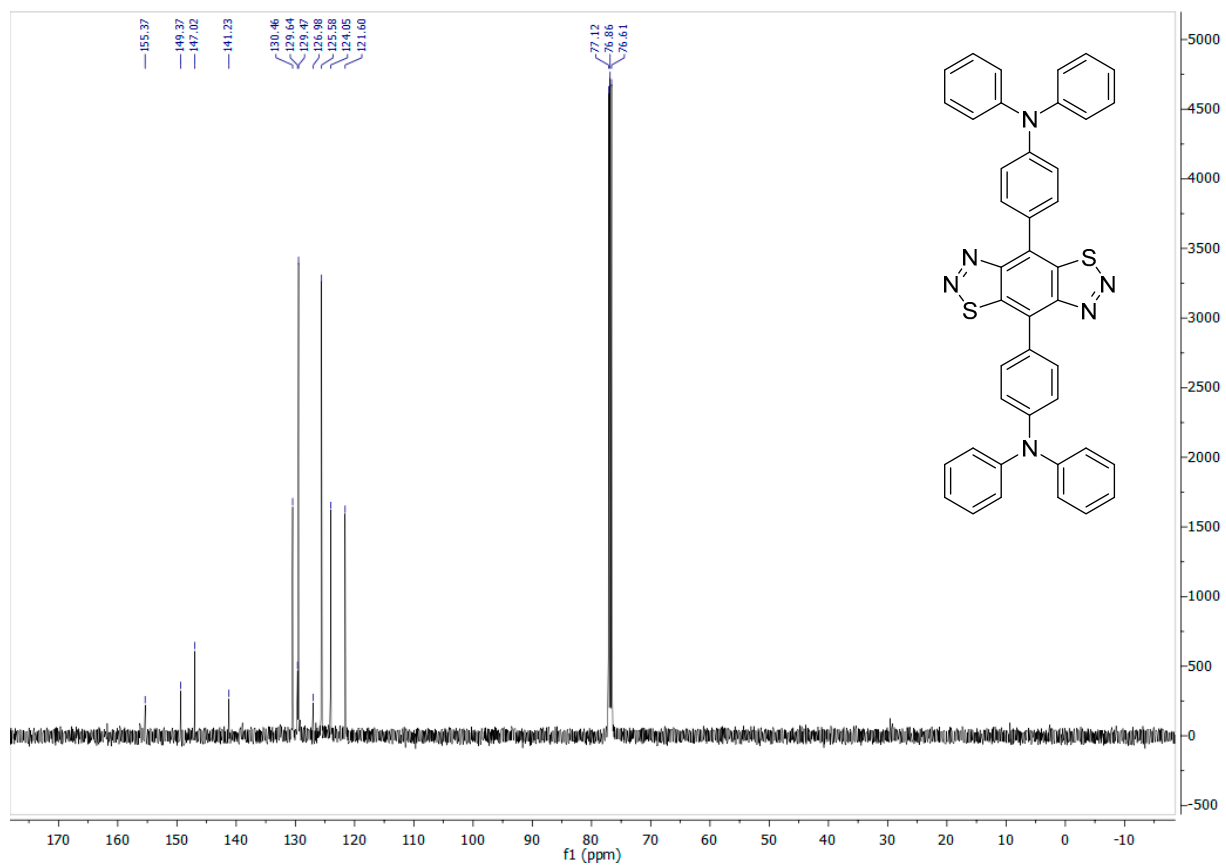

# Display Report

## Analysis Info

Analysis Name D:\Data\Kolotyrkina\2022\Chmovsh\0713009.d  
 Method tune\_low.m  
 Sample Name /SUSU Tim-539  
 Comment C42H28N6S2 mH 681.1890clb added CH3CN

Acquisition Date 13.07.2022 14:03:45

Operator BDAL@DE  
 Instrument / Ser# maXis 43

## Acquisition Parameter

|             |            |                      |          |                  |           |
|-------------|------------|----------------------|----------|------------------|-----------|
| Source Type | ESI        | Ion Polarity         | Positive | Set Nebulizer    | 0.4 Bar   |
| Focus       | Not active |                      |          | Set Dry Heater   | 180 °C    |
| Scan Begin  | 50 m/z     | Set Capillary        | 4500 V   | Set Dry Gas      | 4.0 l/min |
| Scan End    | 1500 m/z   | Set End Plate Offset | -500 V   | Set Divert Valve | Source    |

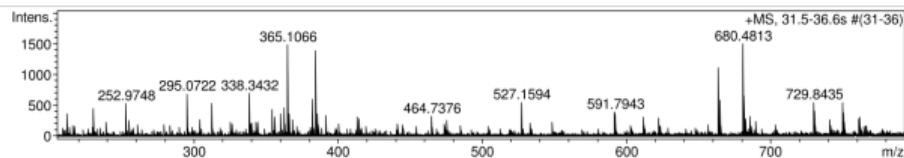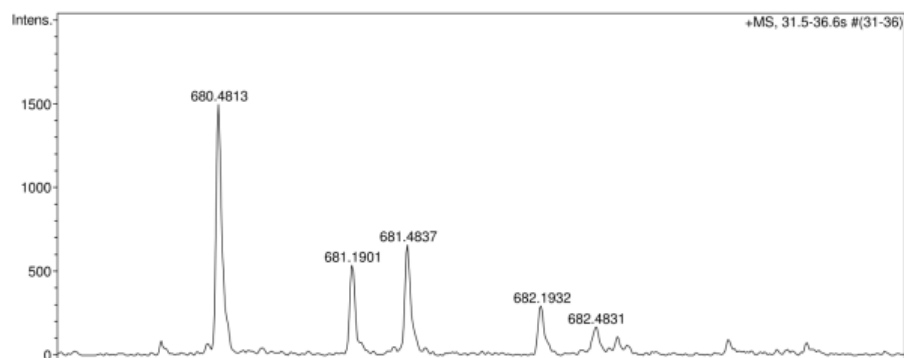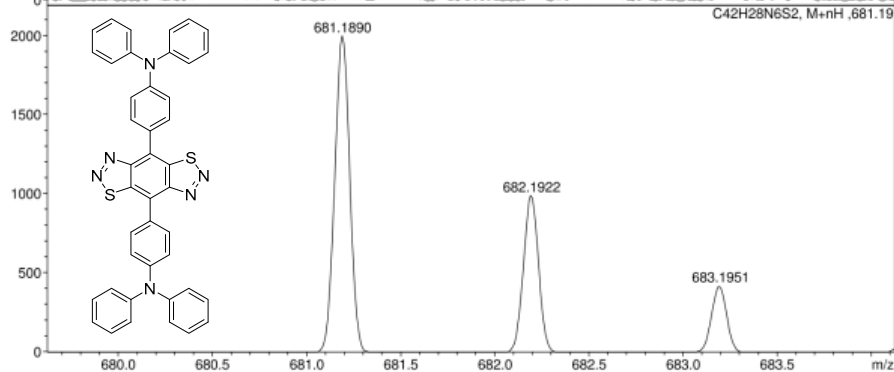

### Quantum-chemical calculations

DFT calculations were performed with the Gaussian 16 Rev C.01.<sup>1</sup> DFT calculations were performed with the Gaussian 16 Rev C.01. M11 DFT functional with 6-31+g(d) basis set was used for all calculations. Calculations were performed in dichloromethane (PCM model). Data from X-ray diffraction experiments were used as starting points for geometry optimization. Cartesian coordinates are given in angstroms; absolute energies for all substances are given in hartrees. Analysis of vibrational frequencies was performed for the optimized structure. The compound was characterized by only real vibrational frequencies. Wavefunction stability, using *stable* keyword, was also checked for the molecule.

For calculations of optimized geometries, frequencies, thermodynamics, HOMO and LUMO energies following keywords were used:

*# opt freq 6-31+g(d) scrf=(solvent=dichloromethane) nosymm m11 test*

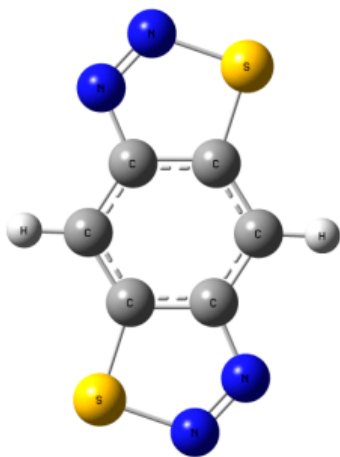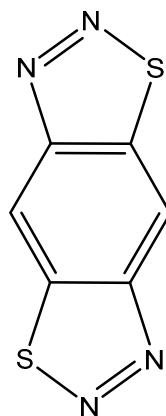

Charge 0; multiplicity 1

---

|   |            |            |             |
|---|------------|------------|-------------|
| S | 6.50031800 | 2.71554400 | 5.46659000  |
| N | 4.44929700 | 3.60408300 | 4.33387400  |
| N | 5.56231600 | 3.07917600 | 4.07791200  |
| C | 2.98324600 | 4.44144200 | 7.59676800  |
| C | 3.04398300 | 4.34416300 | 6.21269500  |
| C | 4.20732800 | 3.78281500 | 5.69345300  |
| S | 1.75621700 | 5.05904400 | 8.64216800  |
| N | 3.80724800 | 4.17051900 | 9.77488200  |
| N | 2.69423600 | 4.69543800 | 10.03084600 |
| C | 5.27329500 | 3.33315800 | 6.51198800  |
| C | 5.21255800 | 3.43043700 | 7.89606200  |
| C | 4.04921600 | 3.99178500 | 8.41530400  |
| H | 6.01272100 | 3.09520200 | 8.55422700  |
| H | 2.24382100 | 4.67939500 | 5.55453000  |

|                                                        |              |                                    |
|--------------------------------------------------------|--------------|------------------------------------|
| DFT M11 / 6-31+g(d) solvent dichloromethane, PCM model |              |                                    |
| Total electronic energy=                               | -1244.877827 | E <sub>0</sub>                     |
| Sum of electronic and zero-point Energies=             | -1244.797330 | E <sub>0</sub> + E <sub>ZPE</sub>  |
| Sum of electronic and thermal Energies=                | -1244.789137 | E <sub>0</sub> + E <sub>tot</sub>  |
| Sum of electronic and thermal Enthalpies=              | -1244.788193 | E <sub>0</sub> + H <sub>corr</sub> |
| Sum of electronic and thermal Free Energies=           | -1244.831394 | E <sub>0</sub> + G <sub>corr</sub> |
| Zero-point correction ( <i>unscaled</i> ) =            | 0.080497     |                                    |
| Number of imaginary vibrational frequencies = 0        |              |                                    |
| E HOMO = -9.23 eV                                      |              |                                    |
| E LUMO = -1.04 eV                                      |              |                                    |
| E gap = 8.19 eV                                        |              |                                    |

HOMO:

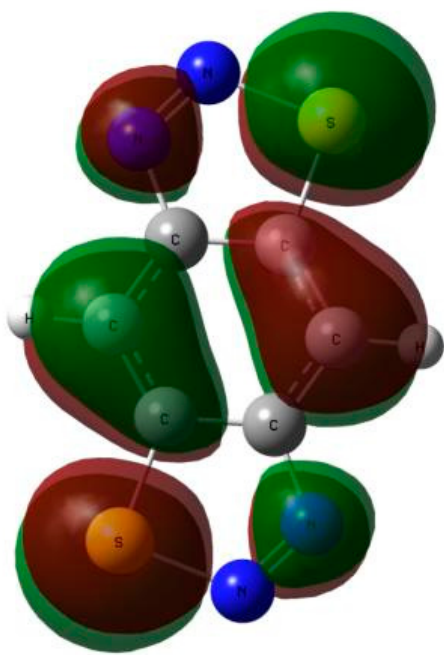

LUMO:

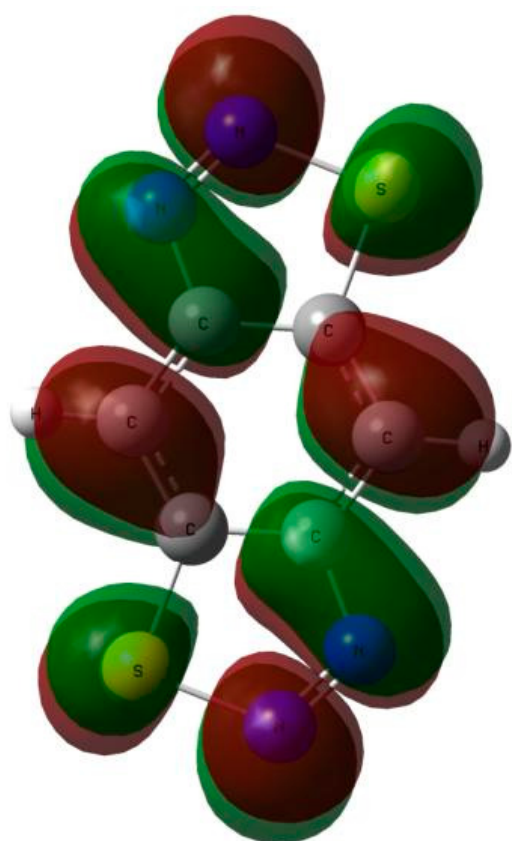

Supplement: s1 [file s1]
